# Supplementary material for: Asymmetric synthesis of cyclopentanones through dual Lewis acid-catalysed [3+2]-cycloaddition of donor–acceptor cyclopropanes with ketenes
Source: Royal Society of Chemistry journal article supplement (doi:10.1039/c9cc07477e), 2019-01-01

# Asymmetric Synthesis of Cyclopentanones through Dual Lewis Acid-Catalysed [3 + 2]-Cycloaddition of Donor-Acceptor Cyclopropanes with Ketenes

Mukulesh Mondal,<sup>a</sup> Manashi Panda,<sup>a</sup> Nicholas W. Davis,<sup>a</sup> Vickie McKee,<sup>b,c</sup> and Nessian J. Kerrigan<sup>b,\*</sup>

<sup>a</sup> Department of Chemistry, Oakland University, 2200 N. Squirrel Road, Rochester, MI 48309-4477, USA.

<sup>b</sup> School of Chemical Sciences, Dublin City University, Glasnevin, Dublin 9, Ireland.

<sup>c</sup> Department of Physics, Chemistry and Pharmacy, University of Southern Denmark, Campusvej 55, 5230 Odense M, Denmark.

## NMR and GC/HPLC spectra

### Table of Contents:

|                                                        |     |
|--------------------------------------------------------|-----|
| GC of (±)- <b>1a</b>                                   | S4  |
| GC of <b>1a</b>                                        | S5  |
| GC of (±)- <b>1b</b>                                   | S6  |
| GC of ( <i>S</i> )- <b>1b</b>                          | S7  |
| GC of ( <i>R</i> )- <b>1b</b>                          | S8  |
| GC of (±)- <b>1c</b>                                   | S9  |
| GC of ( <i>S</i> )- <b>1c</b>                          | S10 |
| GC of ( <i>R</i> )- <b>1c</b>                          | S11 |
| GC of (±)- <b>1e</b>                                   | S12 |
| GC of ( <i>S</i> )- <b>1e</b>                          | S13 |
| GC of ( <i>R</i> )- <b>1e</b>                          | S14 |
| HPLC of (±)- <b>4a</b>                                 | S15 |
| HPLC of (–)- <b>4a</b>                                 | S16 |
| <sup>1</sup> H & <sup>13</sup> C NMR of (–)- <b>4a</b> | S17 |
| HPLC of (±)- <b>4b</b>                                 | S18 |
| HPLC of (+)- <b>4b</b>                                 | S19 |
| <sup>1</sup> H & <sup>13</sup> C NMR of (+)- <b>4b</b> | S20 |
| HPLC of (±)- <b>4c</b>                                 | S21 |
| HPLC of (–)- <b>4c</b>                                 | S22 |
| HPLC of (+)- <b>4d</b>                                 | S23 |
| <sup>1</sup> H & <sup>13</sup> C NMR of (–)- <b>4c</b> | S24 |
| <sup>1</sup> H & <sup>13</sup> C NMR of (+)- <b>4d</b> | S25 |

|                                                            |     |
|------------------------------------------------------------|-----|
| $^1\text{H}$ & $^{13}\text{C}$ NMR of ( $\pm$ )- <b>4e</b> | S26 |
| HPLC of ( $\pm$ )- <b>4f</b>                               | S27 |
| HPLC of (-)- <b>4f</b>                                     | S28 |
| HPLC of (+)- <b>4g</b>                                     | S29 |
| $^1\text{H}$ & $^{13}\text{C}$ NMR of (-)- <b>4f</b>       | S30 |
| $^1\text{H}$ & $^{13}\text{C}$ NMR of (+)- <b>4g</b>       | S31 |
| HPLC of ( $\pm$ )- <b>4h</b>                               | S32 |
| HPLC of (-)- <b>4h</b>                                     | S33 |
| HPLC of (+)- <b>4i</b>                                     | S34 |
| $^1\text{H}$ & $^{13}\text{C}$ NMR of (-)- <b>4h</b>       | S35 |
| $^1\text{H}$ & $^{13}\text{C}$ NMR of (+)- <b>4i</b>       | S36 |
| HPLC of ( $\pm$ )- <b>4j</b>                               | S37 |
| HPLC of (-)- <b>4j</b>                                     | S38 |
| HPLC of (+)- <b>4k</b>                                     | S39 |
| $^1\text{H}$ & $^{13}\text{C}$ NMR of (-)- <b>4j</b>       | S40 |
| $^1\text{H}$ & $^{13}\text{C}$ NMR of (+)- <b>4k</b>       | S41 |
| HPLC of ( $\pm$ )- <b>4l</b>                               | S42 |
| HPLC of (-)- <b>4l</b>                                     | S43 |
| HPLC of (+)- <b>4m</b>                                     | S44 |
| $^1\text{H}$ & $^{13}\text{C}$ NMR of (-)- <b>4l</b>       | S45 |
| $^1\text{H}$ & $^{13}\text{C}$ NMR of (+)- <b>4m</b>       | S46 |
| $^1\text{H}$ & $^{13}\text{C}$ NMR of (-)- <b>4n</b>       | S47 |
| $^1\text{H}$ & $^{13}\text{C}$ NMR of (+)- <b>4o</b>       | S48 |
| HPLC of ( $\pm$ )- <b>4p</b>                               | S49 |
| HPLC of (-)- <b>4p</b>                                     | S50 |
| HPLC of (+)- <b>4q</b>                                     | S51 |
| $^1\text{H}$ & $^{13}\text{C}$ NMR of (-)- <b>4p</b>       | S52 |
| $^1\text{H}$ & $^{13}\text{C}$ NMR of (+)- <b>4q</b>       | S53 |
| HPLC of ( $\pm$ )- <b>4r</b>                               | S54 |
| HPLC of (-)- <b>4r</b>                                     | S55 |
| HPLC of (+)- <b>4s</b>                                     | S56 |
| $^1\text{H}$ & $^{13}\text{C}$ NMR of (-)- <b>4r</b>       | S57 |
| $^1\text{H}$ & $^{13}\text{C}$ NMR of (+)- <b>4s</b>       | S58 |
| HPLC of ( $\pm$ )- <b>4t</b>                               | S59 |

|                                                        |     |
|--------------------------------------------------------|-----|
| HPLC of (-)- <b>4t</b>                                 | S60 |
| HPLC of (+)- <b>4v</b>                                 | S61 |
| HPLC of (±)- <b>4u</b>                                 | S62 |
| HPLC of (+)- <b>4u</b>                                 | S63 |
| HPLC of (-)- <b>4w</b>                                 | S64 |
| <sup>1</sup> H & <sup>13</sup> C NMR of (-)- <b>4t</b> | S65 |
| <sup>1</sup> H & <sup>13</sup> C NMR of (+)- <b>4u</b> | S66 |
| <sup>1</sup> H & <sup>13</sup> C NMR of (+)- <b>4v</b> | S67 |
| <sup>1</sup> H & <sup>13</sup> C NMR of (-)- <b>4w</b> | S68 |
| <sup>1</sup> H & <sup>13</sup> C NMR of (+)- <b>5u</b> | S69 |

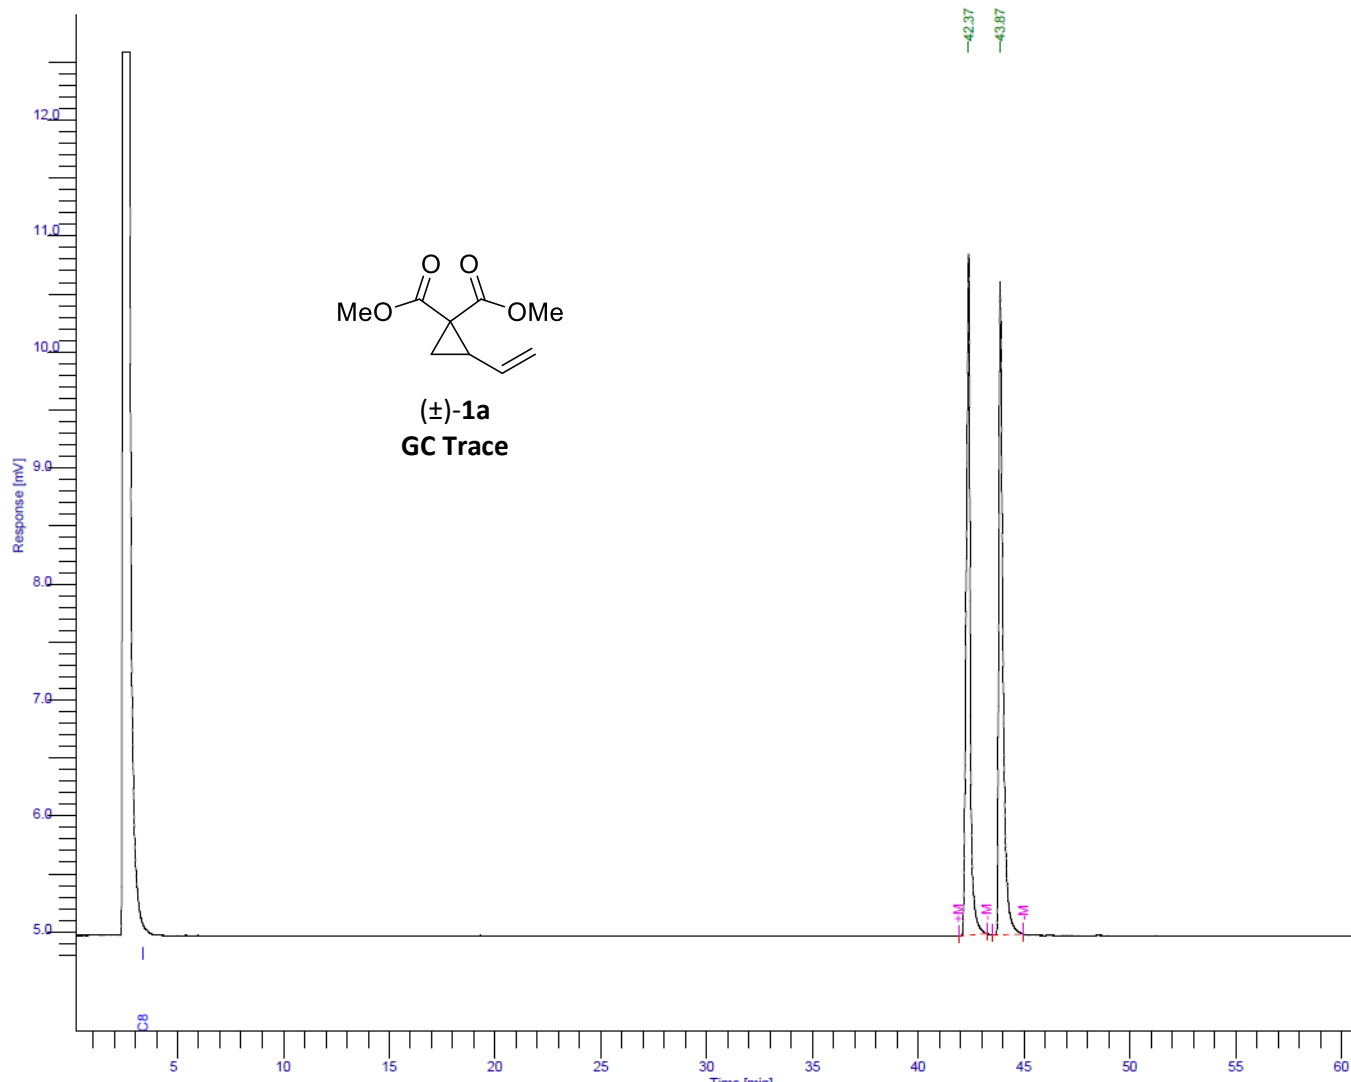

| Peak # | Component Name | Time [min] | Area [uV*sec] | Height [uV] | Area/Amount | Raw Amount |
|--------|----------------|------------|---------------|-------------|-------------|------------|
| 1      |                | 42.373     | 75937.53      | 5871.94     | -----       | -----      |
| 2      |                | 43.866     | 75994.95      | 5618.09     | 1.0000e+06  | 0.0760     |
|        |                |            | 151932.48     | 11490.03    | 1.0000e+06  | 0.0760     |

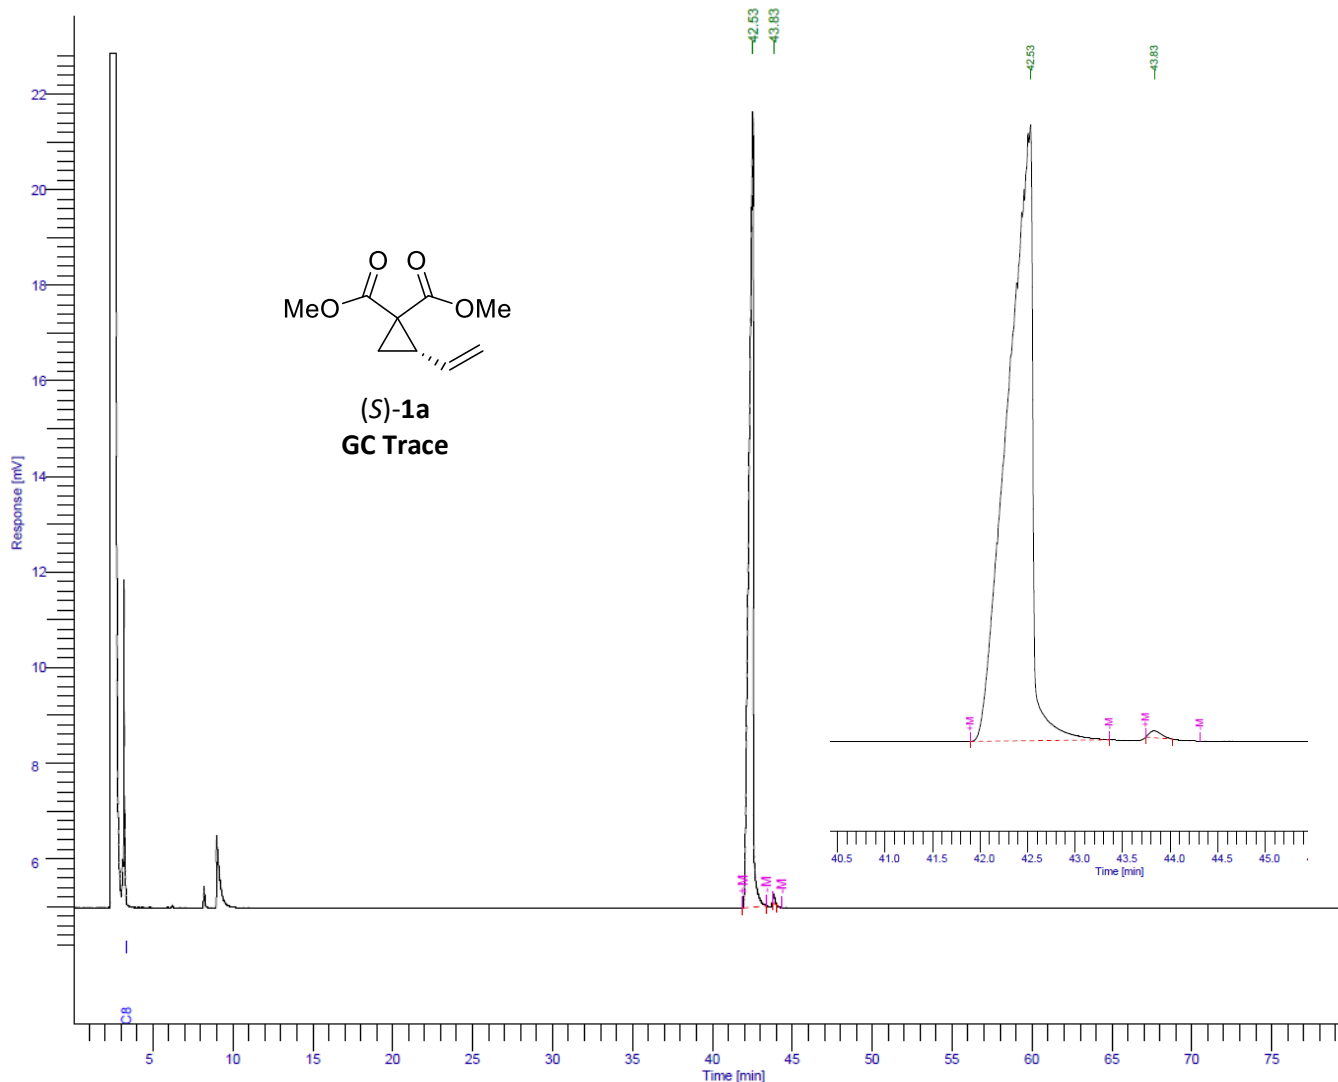

| Peak # | Component Name | Time [min] | Area [uV*sec] | Height [uV] | Area/Amount | Raw Amount |
|--------|----------------|------------|---------------|-------------|-------------|------------|
| 1      |                | 42.533     | 303975.63     | 16636.36    | -----       | -----      |
| 2      |                | 43.832     | 1613.44       | 186.37      | 1.0000e+06  | 0.0016     |
|        |                |            | 305589.07     | 16822.72    | 1.0000e+06  | 0.0016     |

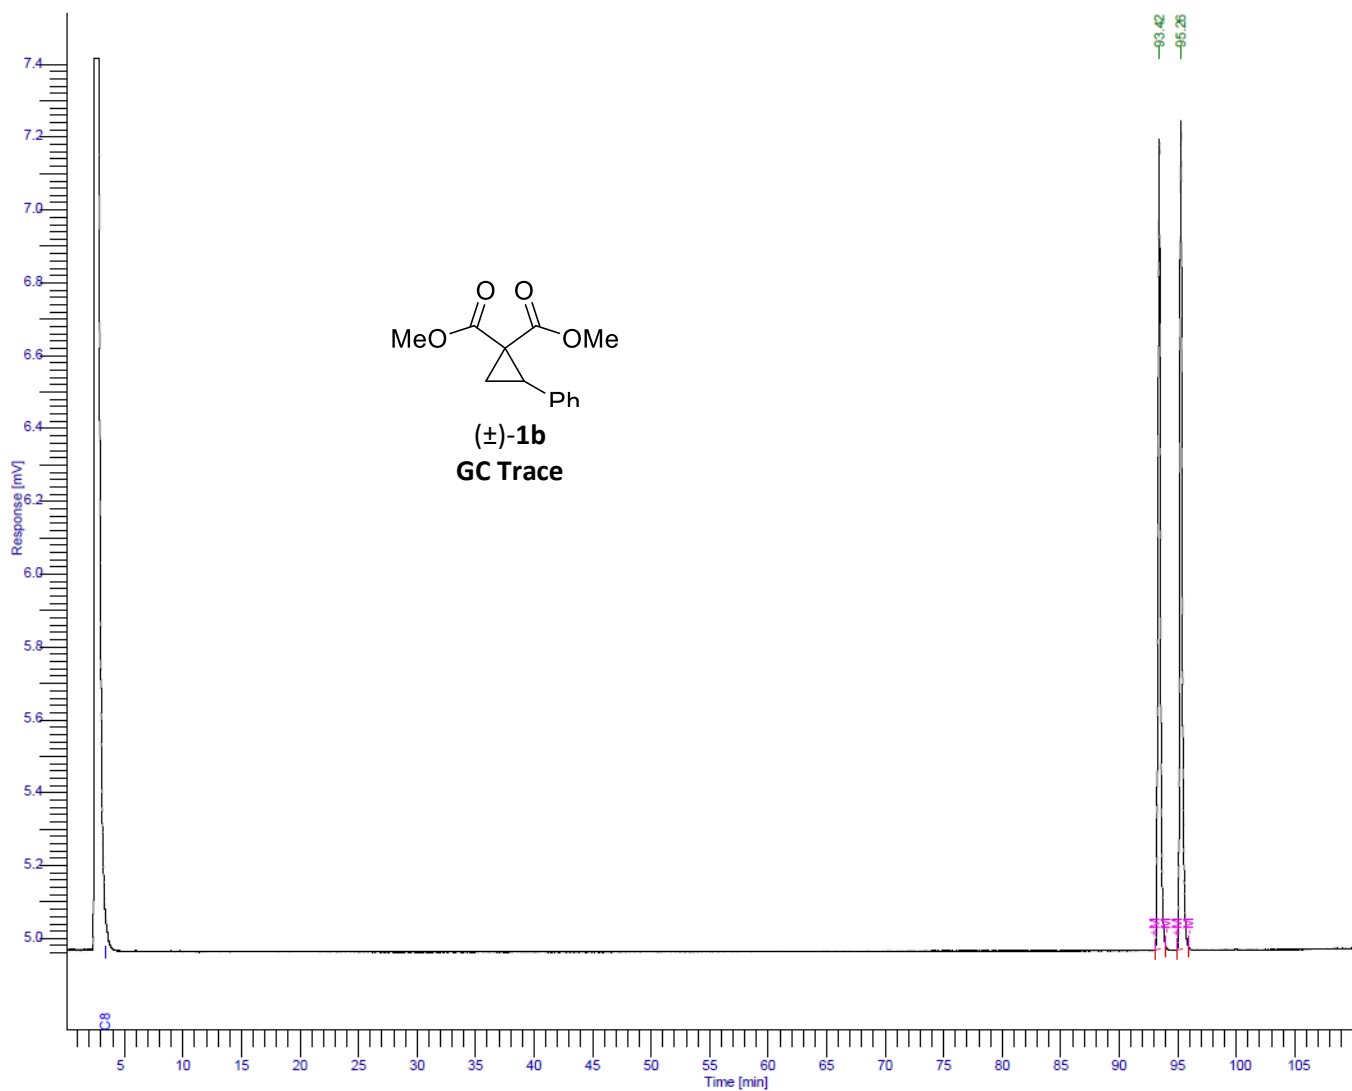

| Peak # | Component Name | Time [min] | Area [uV*sec] | Height [uV] | Area/ Amount | Raw Amount |
|--------|----------------|------------|---------------|-------------|--------------|------------|
| 1      |                | 93.424     | 32665.53      | 2223.41     | -----        | -----      |
| 2      |                | 95.260     | 32816.79      | 2269.33     | 1.0000e+06   | 0.0328     |
|        |                |            | 65482.32      | 4492.73     | 1.0000e+06   | 0.0328     |

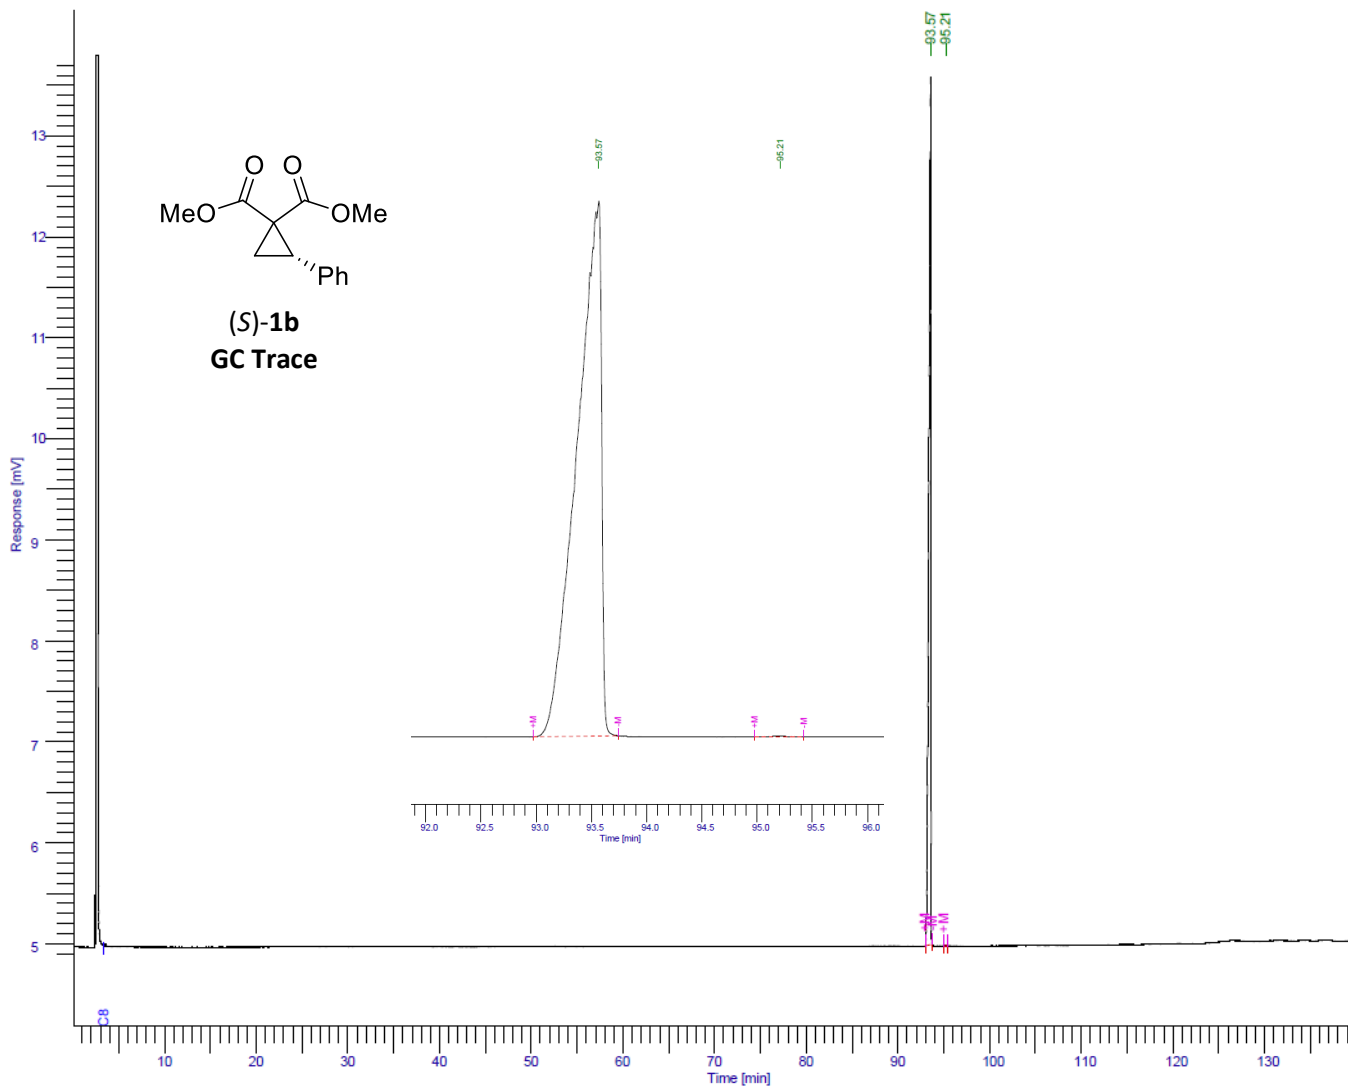

| Peak # | Component Name | Time [min] | Area [ $\mu\text{V}\cdot\text{sec}$ ] | Height [ $\mu\text{V}$ ] | Area/Amount | Raw Amount |
|--------|----------------|------------|---------------------------------------|--------------------------|-------------|------------|
| 1      |                | 93.566     | 130901.92                             | 8618.43                  | 1.0000e+06  | 0.1309     |
| 2      |                | 95.208     | 99.12                                 | 8.53                     | 1.0000e+06  | 0.0001     |
|        |                |            | 131001.05                             | 8626.95                  | 2.0000e+06  | 0.1310     |

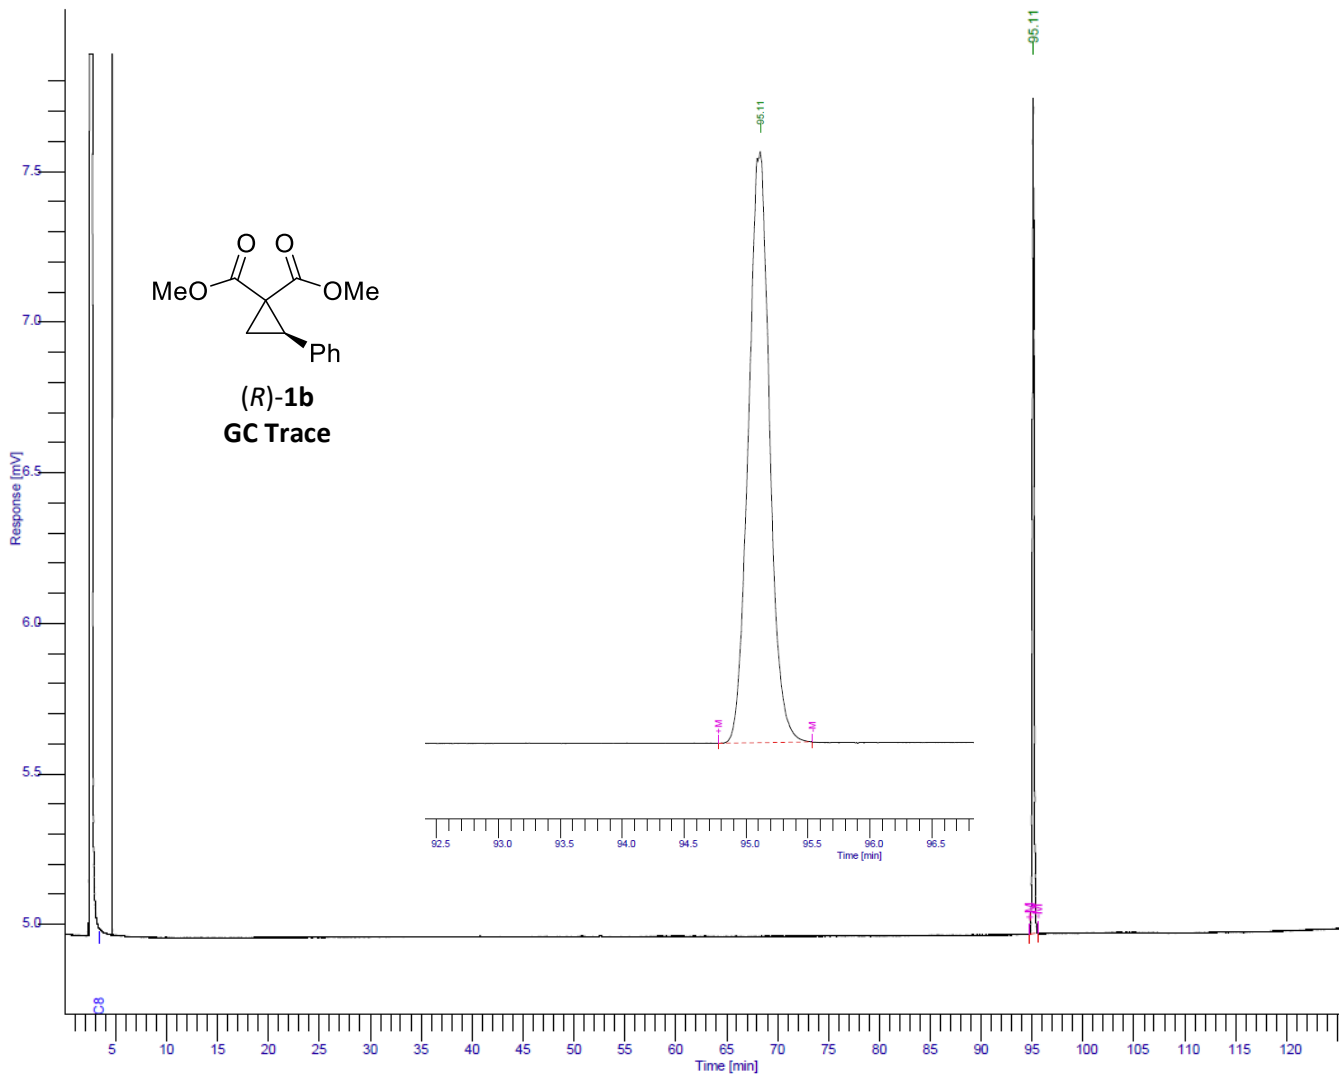

| Peak # | Component Name | Time [min] | Area [uV*sec] | Height [uV] | Area/Amount | Raw Amount |
|--------|----------------|------------|---------------|-------------|-------------|------------|
| 1      |                | 95.115     | 32944.05      | 2772.52     | -----       | -----      |
|        |                |            | 32944.05      | 2772.52     | 0.0000      | 0.0000     |



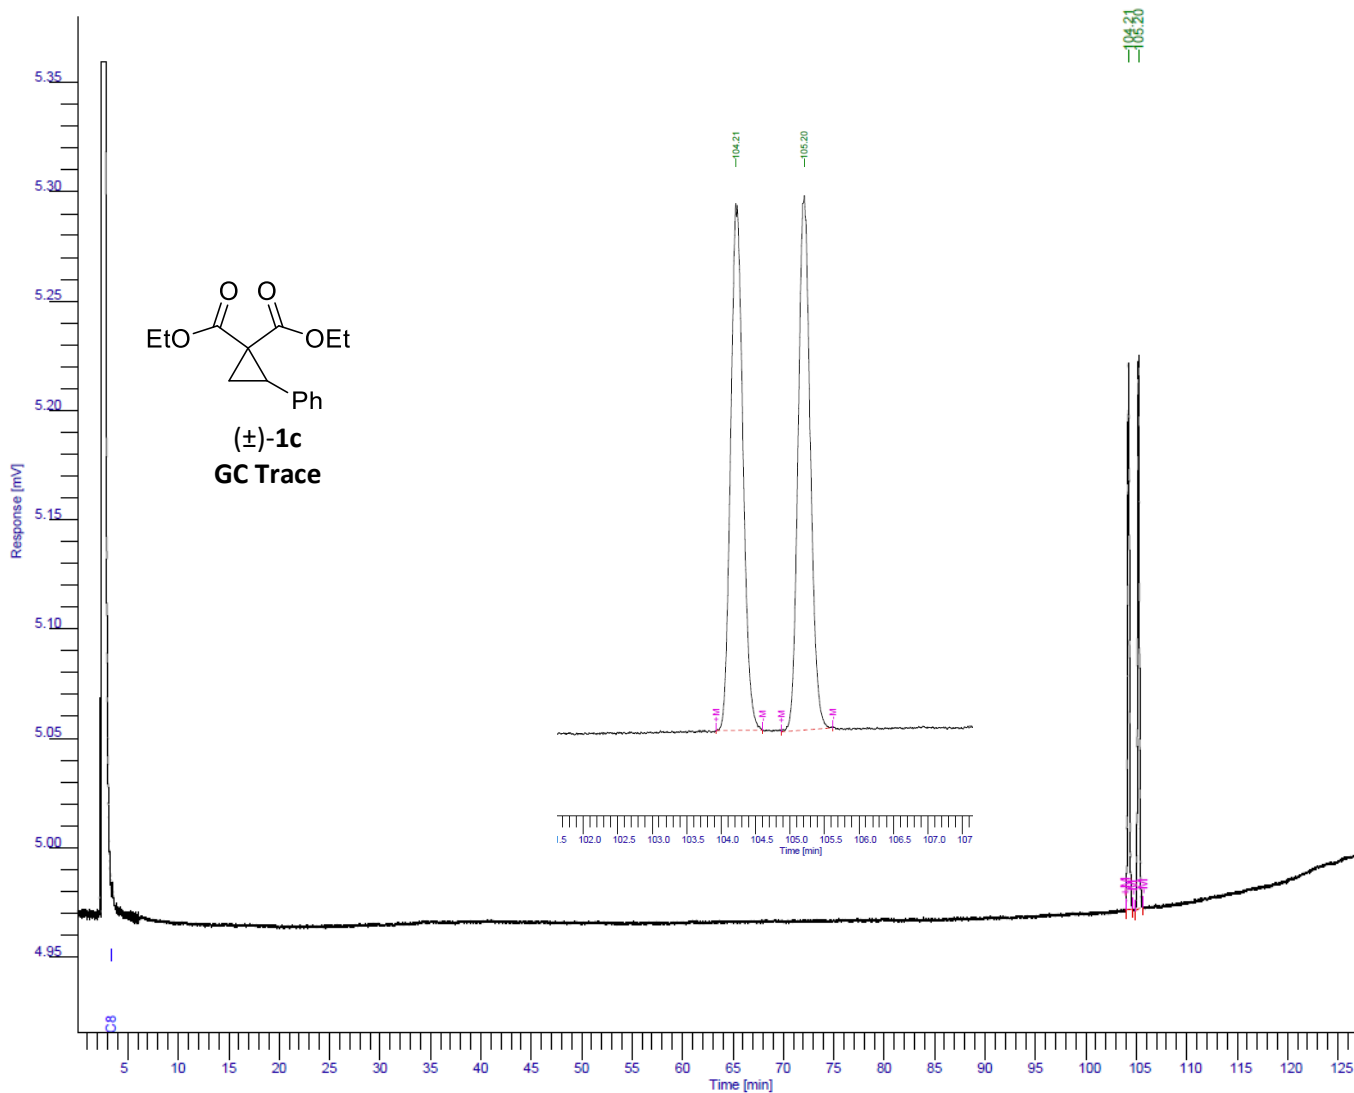

| Peak # | Component Name | Time [min] | Area [ $\mu\text{V}\cdot\text{sec}$ ] | Height [ $\mu\text{V}$ ] | Area/Amount | Raw Amount |
|--------|----------------|------------|---------------------------------------|--------------------------|-------------|------------|
| 1      |                | 104.213    | 3096.40                               | 250.04                   | -----       | -----      |
| 2      |                | 105.205    | 3118.00                               | 253.33                   | 1.0000e+06  | 0.0031     |
|        |                |            | 6214.40                               | 503.37                   | 1.0000e+06  | 0.0031     |

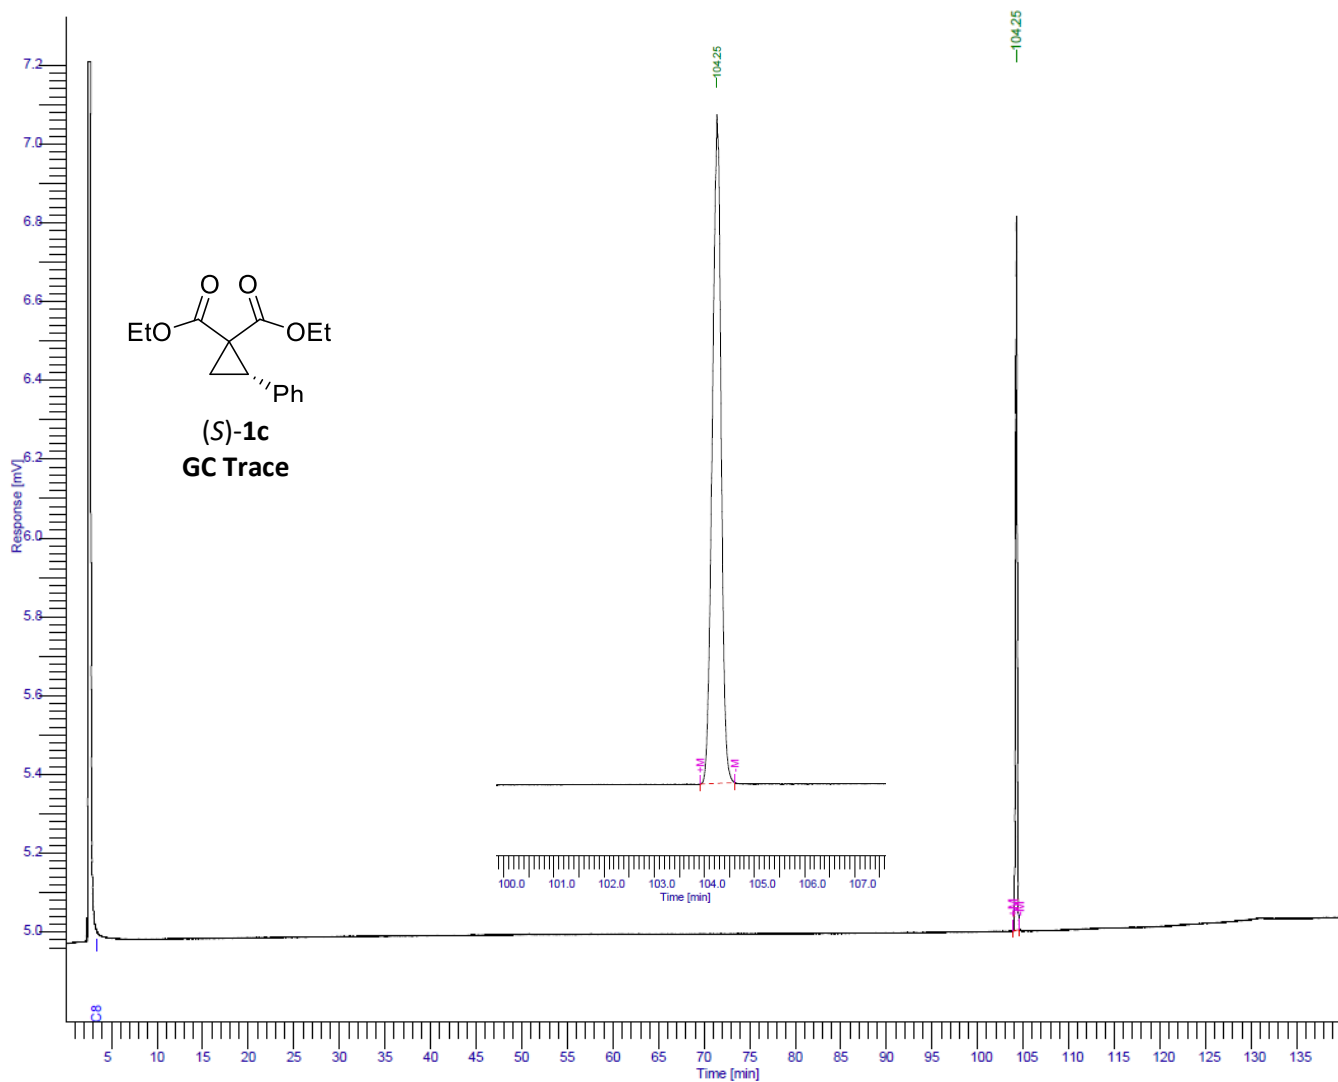

| Peak # | Component Name | Time [min] | Area [ $\mu\text{V}\cdot\text{sec}$ ] | Height [ $\mu\text{V}$ ] | Area/Amount | Raw Amount |
|--------|----------------|------------|---------------------------------------|--------------------------|-------------|------------|
| 1      |                | 104.251    | 21959.00                              | 1810.75                  | -----       | -----      |
|        |                |            | 21959.00                              | 1810.75                  | 0.0000      | 0.0000     |

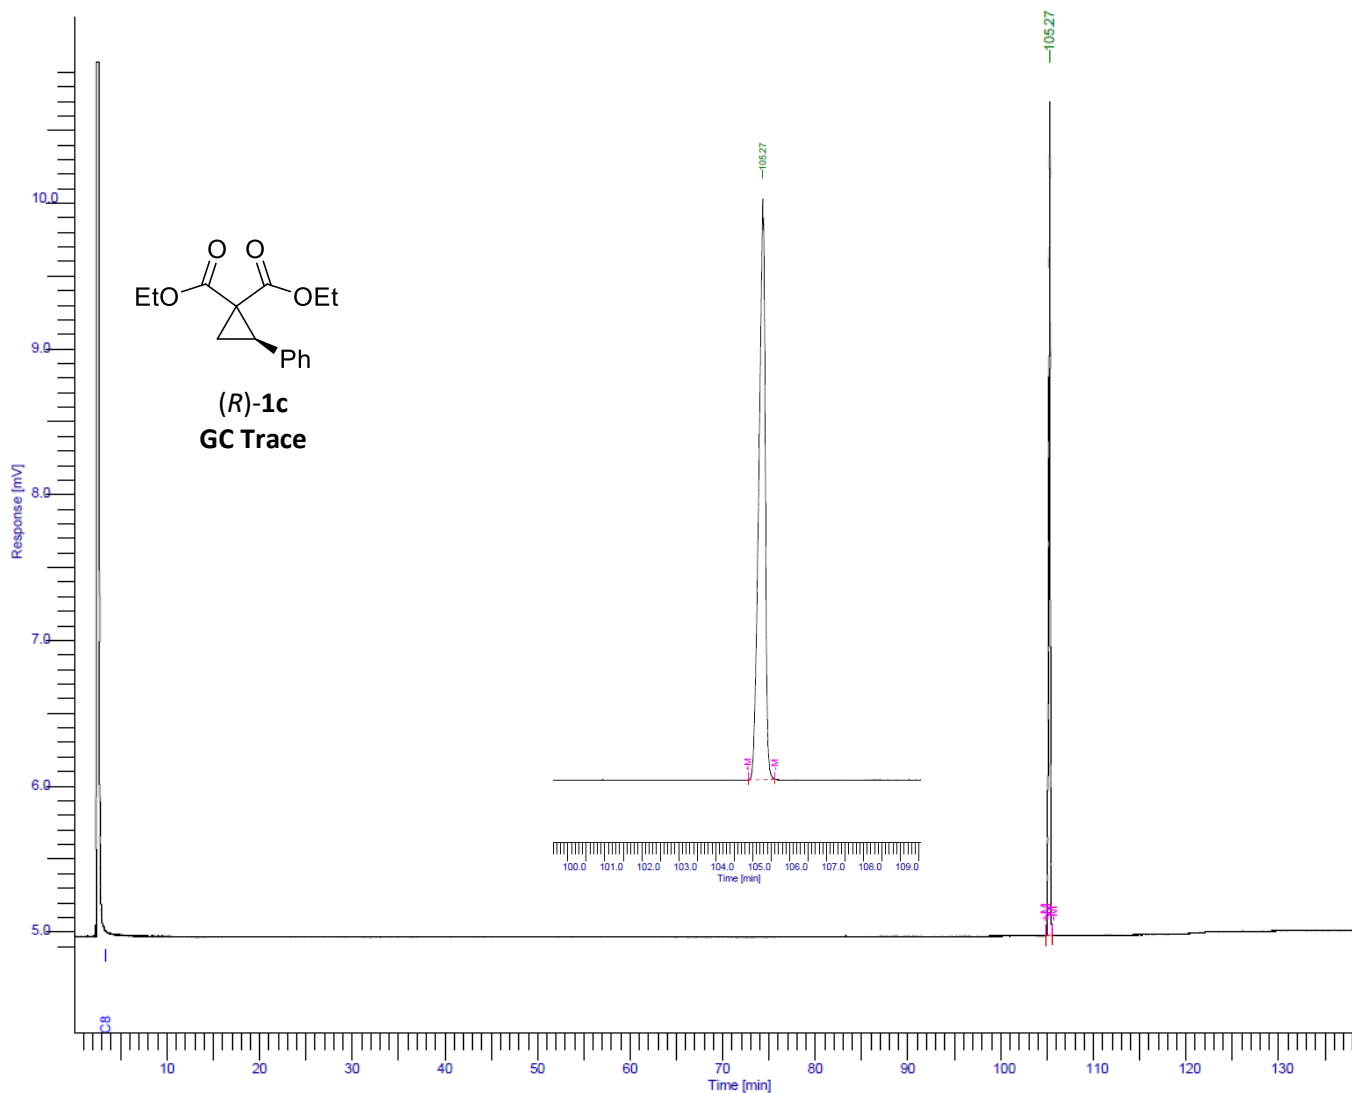

| Peak # | Component Name | Time [min] | Area [uV*sec] | Height [uV] | Area/Amount | Raw Amount |
|--------|----------------|------------|---------------|-------------|-------------|------------|
| 1      |                | 105.275    | 67763.04      | 5715.64     | -----       | -----      |
|        |                |            | 67763.04      | 5715.64     | 0.0000      | 0.0000     |

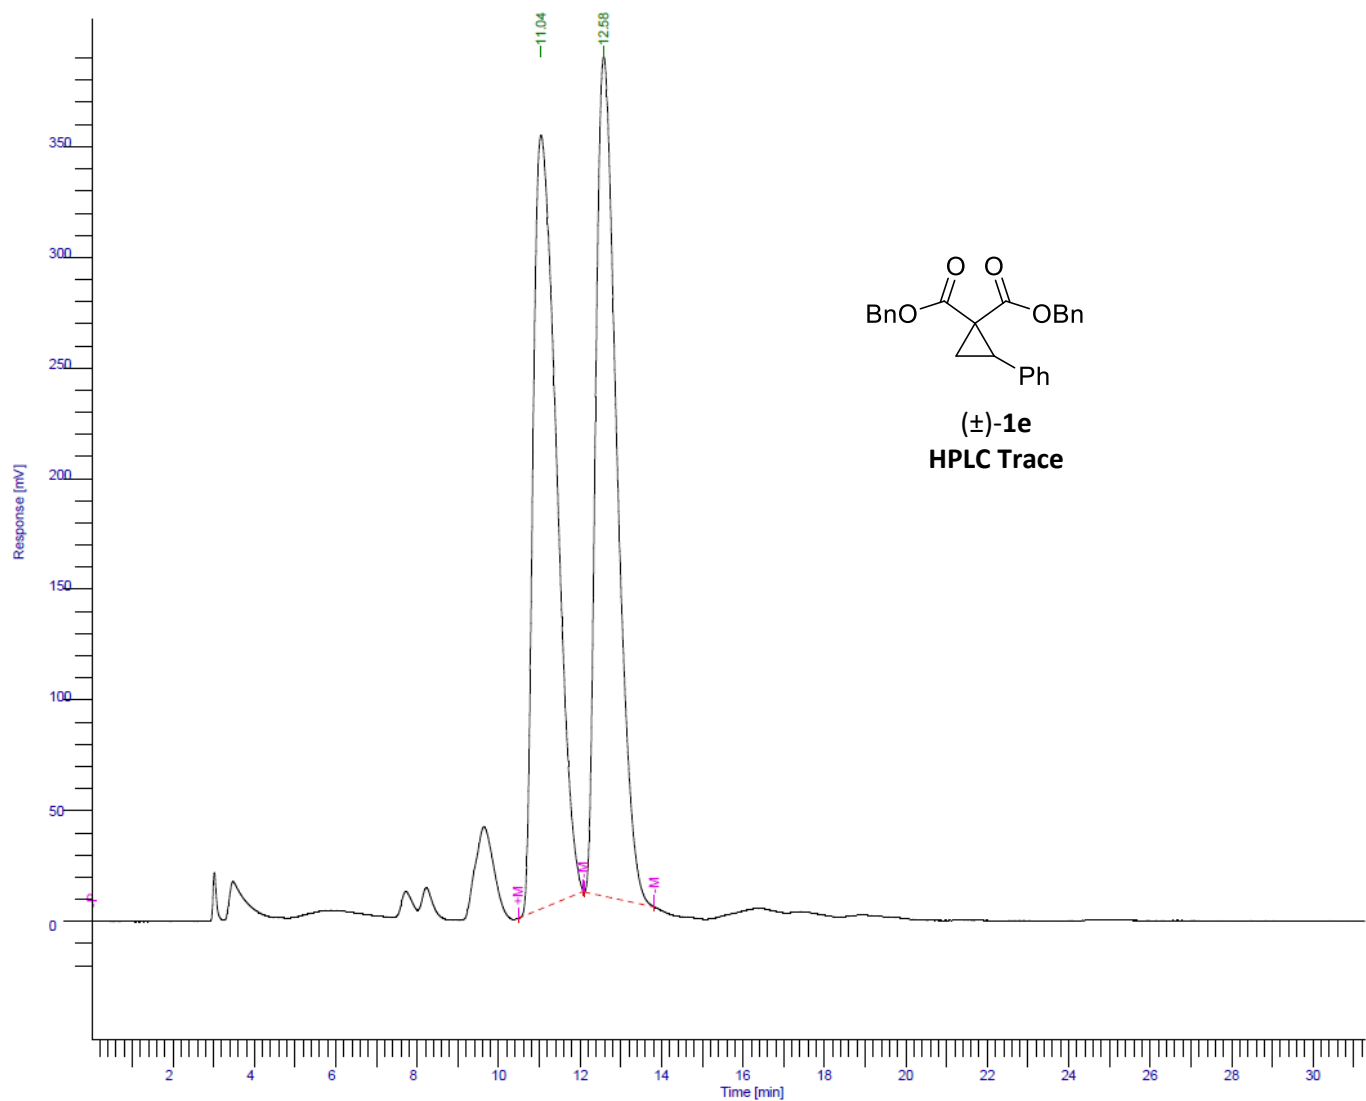

| Peak # | Time [min] | Area [ $\mu\text{V}\cdot\text{s}$ ] | Height [ $\mu\text{V}$ ] | Area [%] | Norm. Area [%] | BL  | Area/Height [s] |
|--------|------------|-------------------------------------|--------------------------|----------|----------------|-----|-----------------|
| 1      | 11.038     | 13922359.21                         | 349547.44                | 50.45    | 50.45          | *BB | 39.8297         |
| 2      | 12.578     | 13673302.72                         | 379202.99                | 49.55    | 49.55          | *BB | 36.0580         |
|        |            | 27595661.93                         | 728750.43                | 100.00   | 100.00         |     |                 |

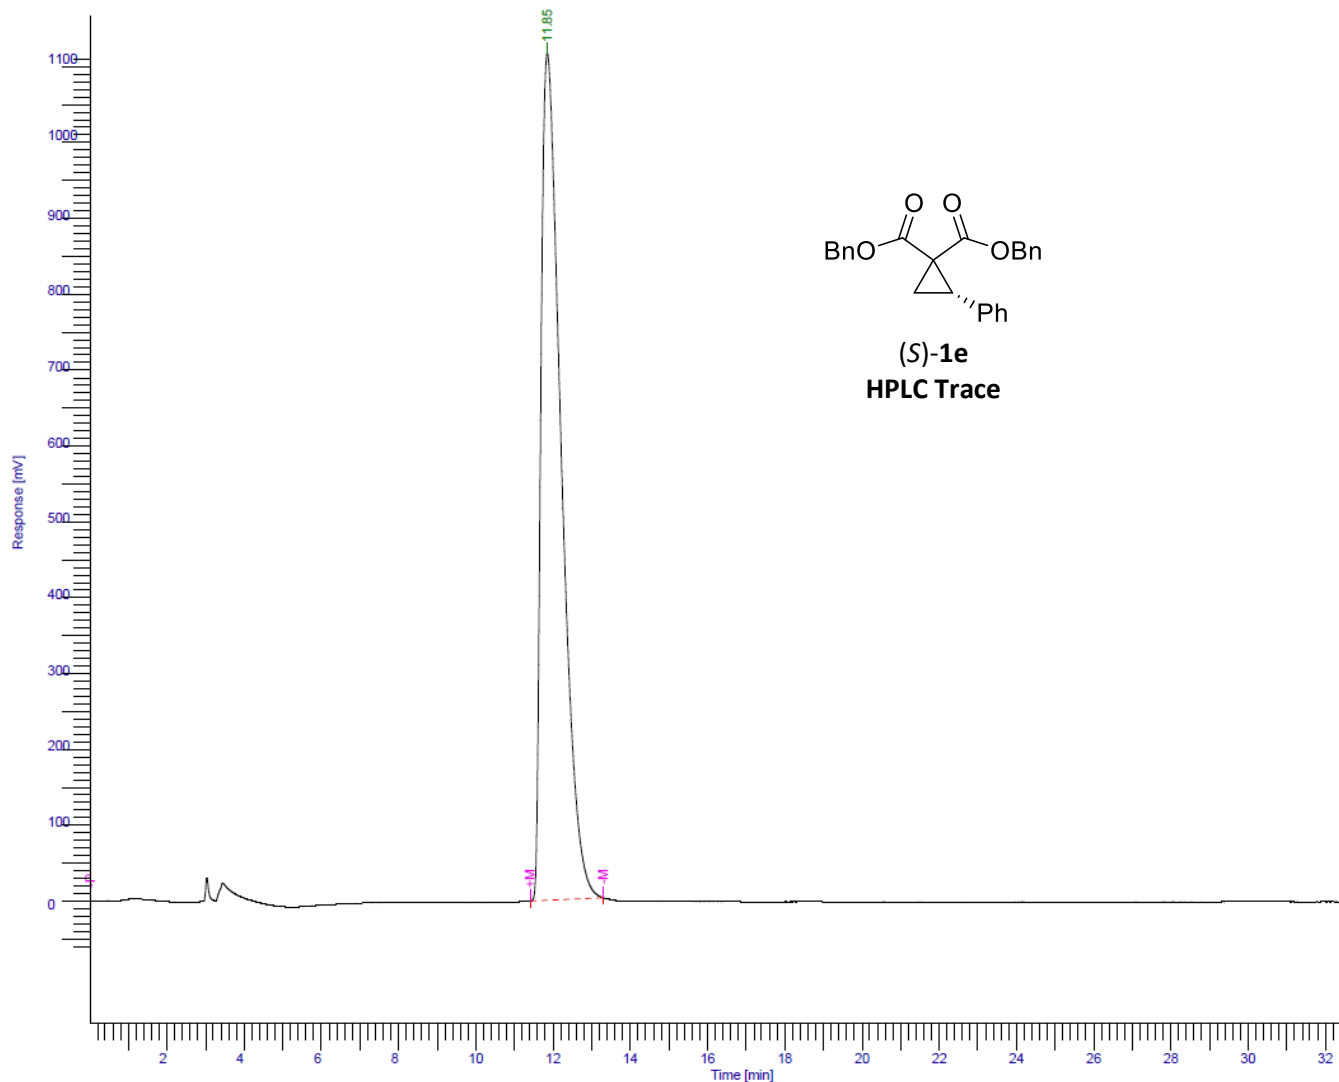

| Peak # | Time [min] | Area [ $\mu\text{V}\cdot\text{s}$ ] | Height [ $\mu\text{V}$ ] | Area [%] | Norm. Area [%] | BL  | Area/Height [s] |
|--------|------------|-------------------------------------|--------------------------|----------|----------------|-----|-----------------|
| 1      | 11.848     | 40553116.91                         | 1.12e+06                 | 100.00   | 100.00         | *BB | 36.3099         |
|        |            | 40553116.91                         | 1.12e+06                 | 100.00   | 100.00         |     |                 |

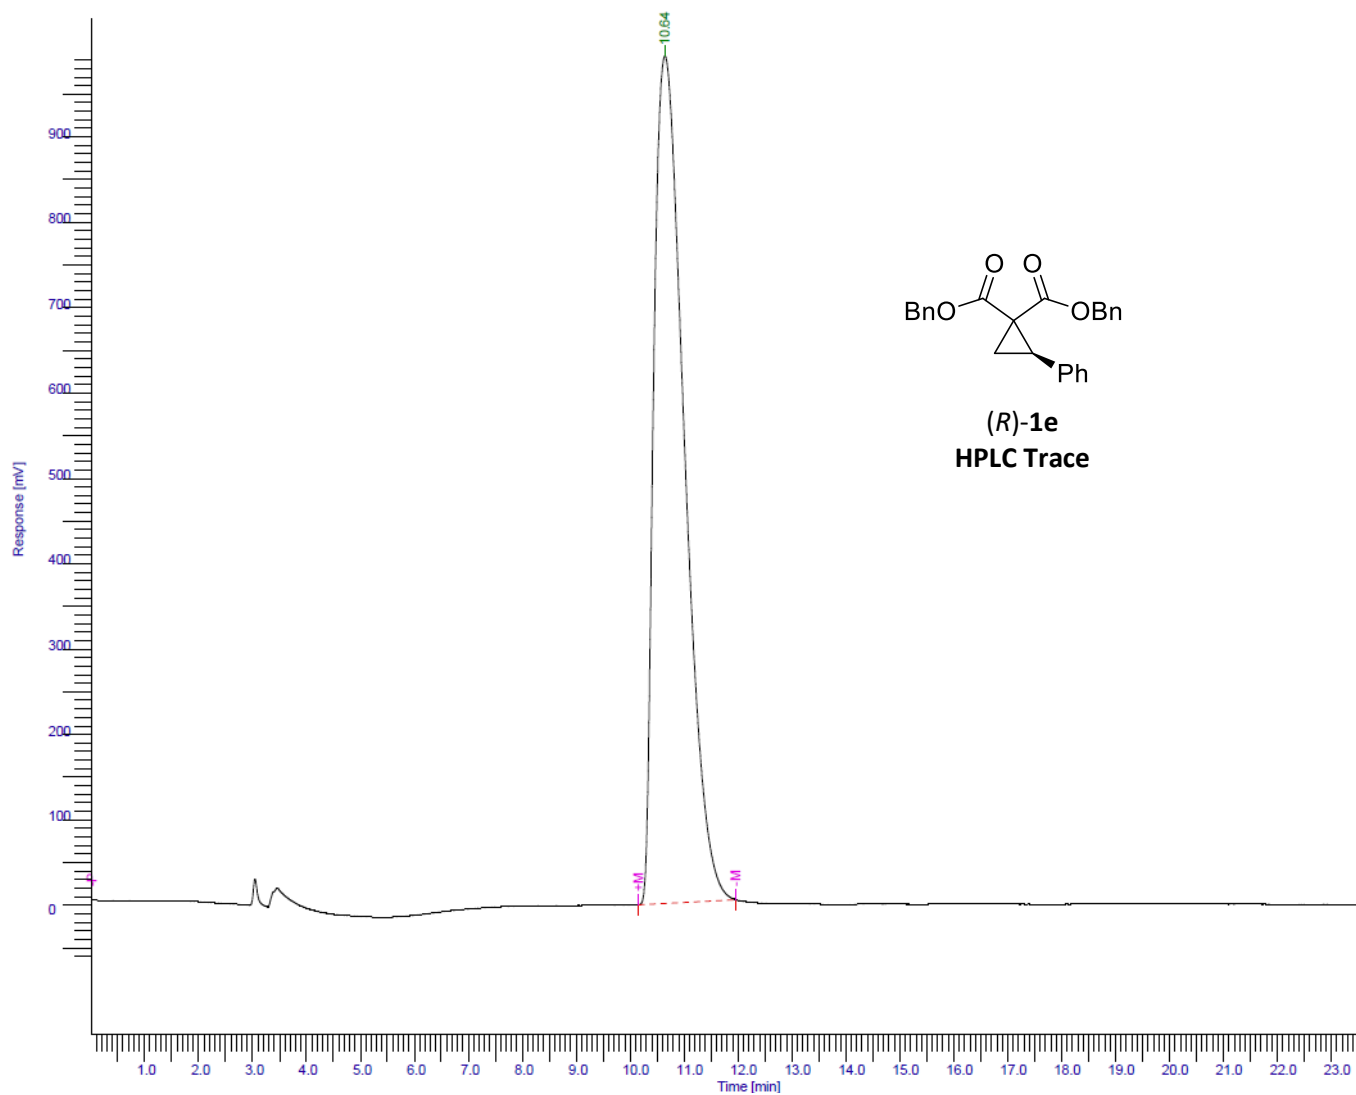

| Peak # | Time [min] | Area [μV·s] | Height [μV] | Area [%] | Norm. Area [%] | BL  | Area/Height [s] |
|--------|------------|-------------|-------------|----------|----------------|-----|-----------------|
| 1      | 10.644     | 39003673.13 | 992772.33   | 100.00   | 100.00         | *BB | 39.2876         |
|        |            | 39003673.13 | 992772.33   | 100.00   | 100.00         |     |                 |

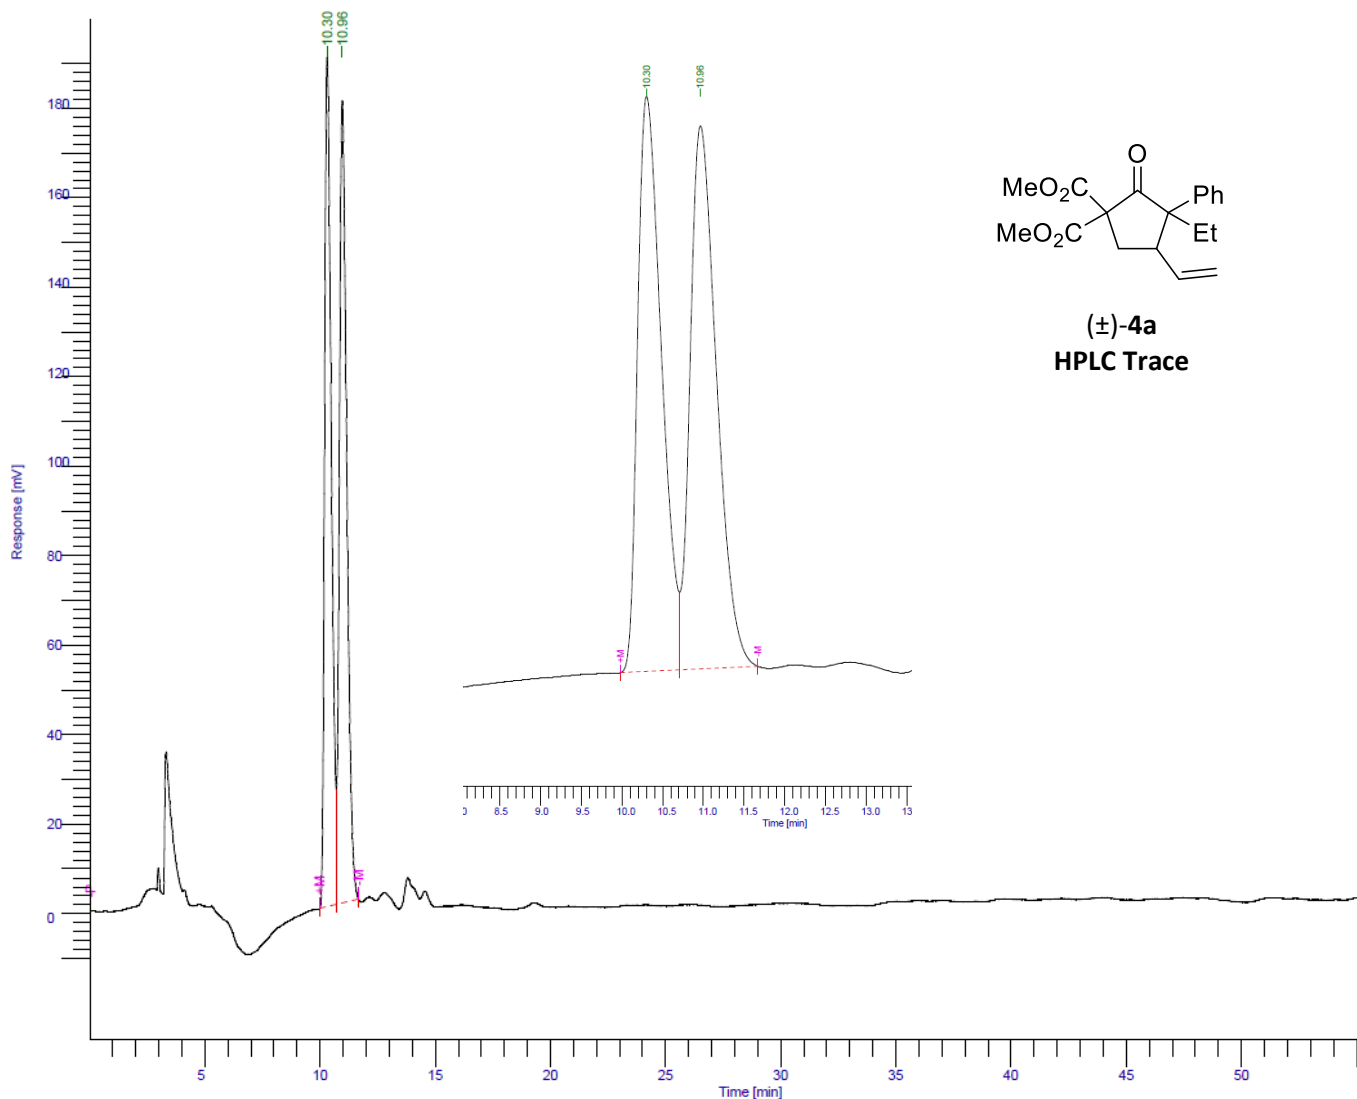

| Peak # | Time [min] | Area [ $\mu\text{V}\cdot\text{s}$ ] | Height [ $\mu\text{V}$ ] | Area [%] | Norm. Area [%] | BL  | Area/Height [s] |
|--------|------------|-------------------------------------|--------------------------|----------|----------------|-----|-----------------|
| 1      | 10.303     | 3850775.90                          | 189894.89                | 48.75    | 48.75          | *BV | 20.2785         |
| 2      | 10.963     | 4048079.43                          | 179315.58                | 51.25    | 51.25          | *VB | 22.5752         |
|        |            | 7898855.33                          | 369210.47                | 100.00   | 100.00         |     |                 |

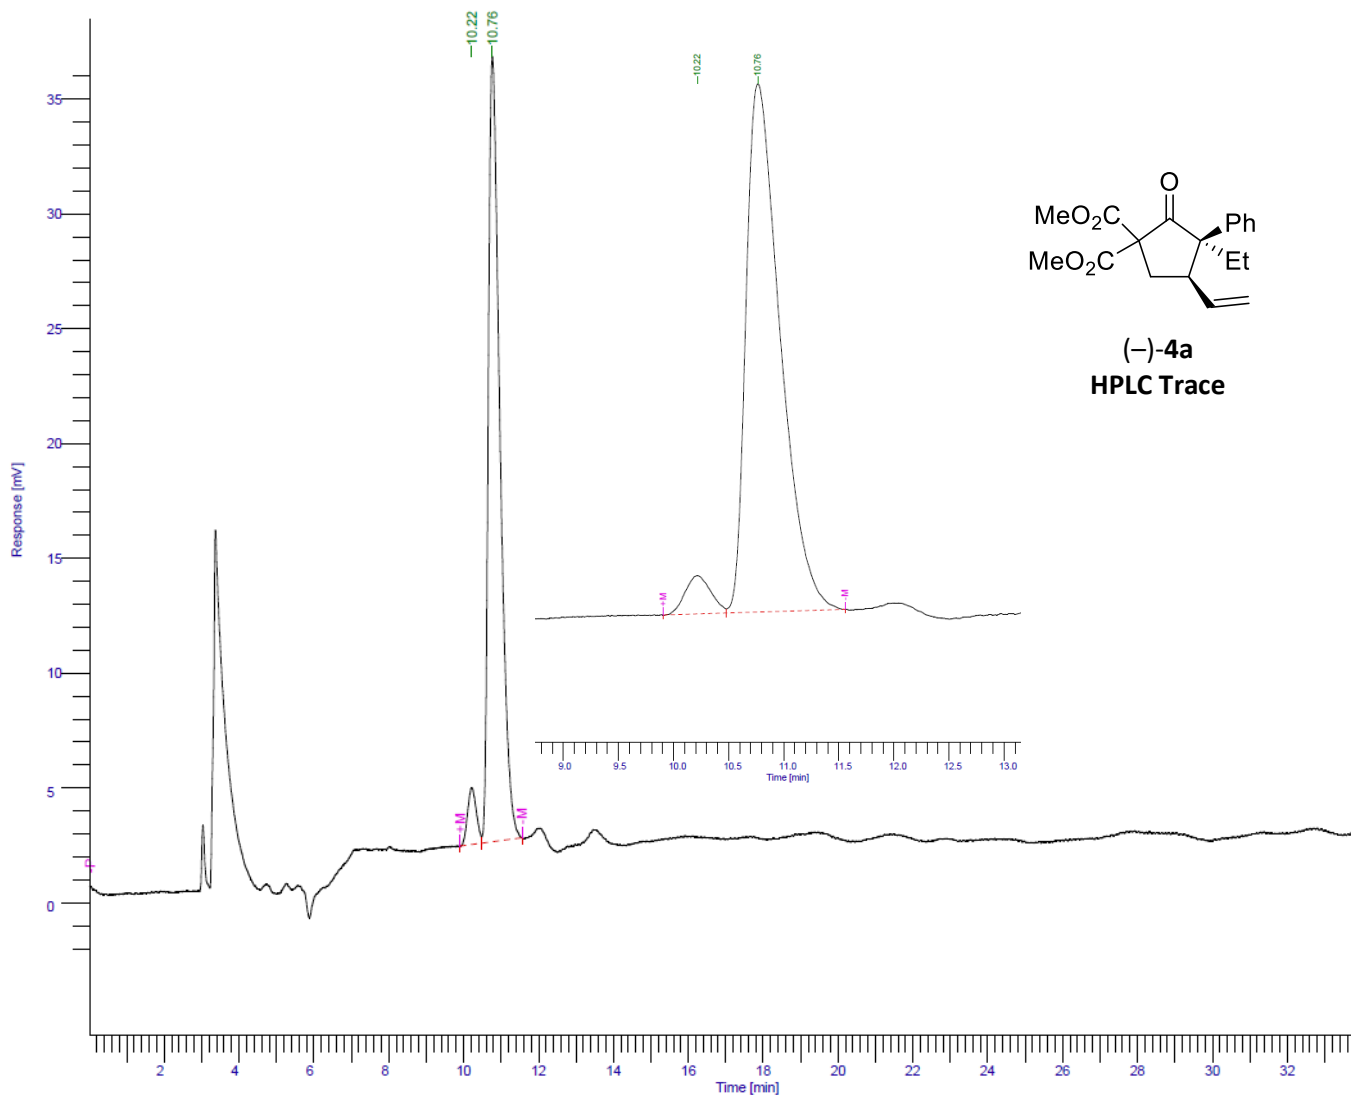

| Peak # | Time [min] | Area [μV·s] | Height [μV] | Area [%] | Norm. Area [%] | BL  | Area/Height [s] |
|--------|------------|-------------|-------------|----------|----------------|-----|-----------------|
| 1      | 10.216     | 40307.47    | 2470.21     | 5.20     | 5.20           | *BV | 16.3174         |
| 2      | 10.765     | 735487.83   | 34188.20    | 94.80    | 94.80          | *VB | 21.5129         |
|        |            | 775795.29   | 36658.40    | 100.00   | 100.00         |     |                 |



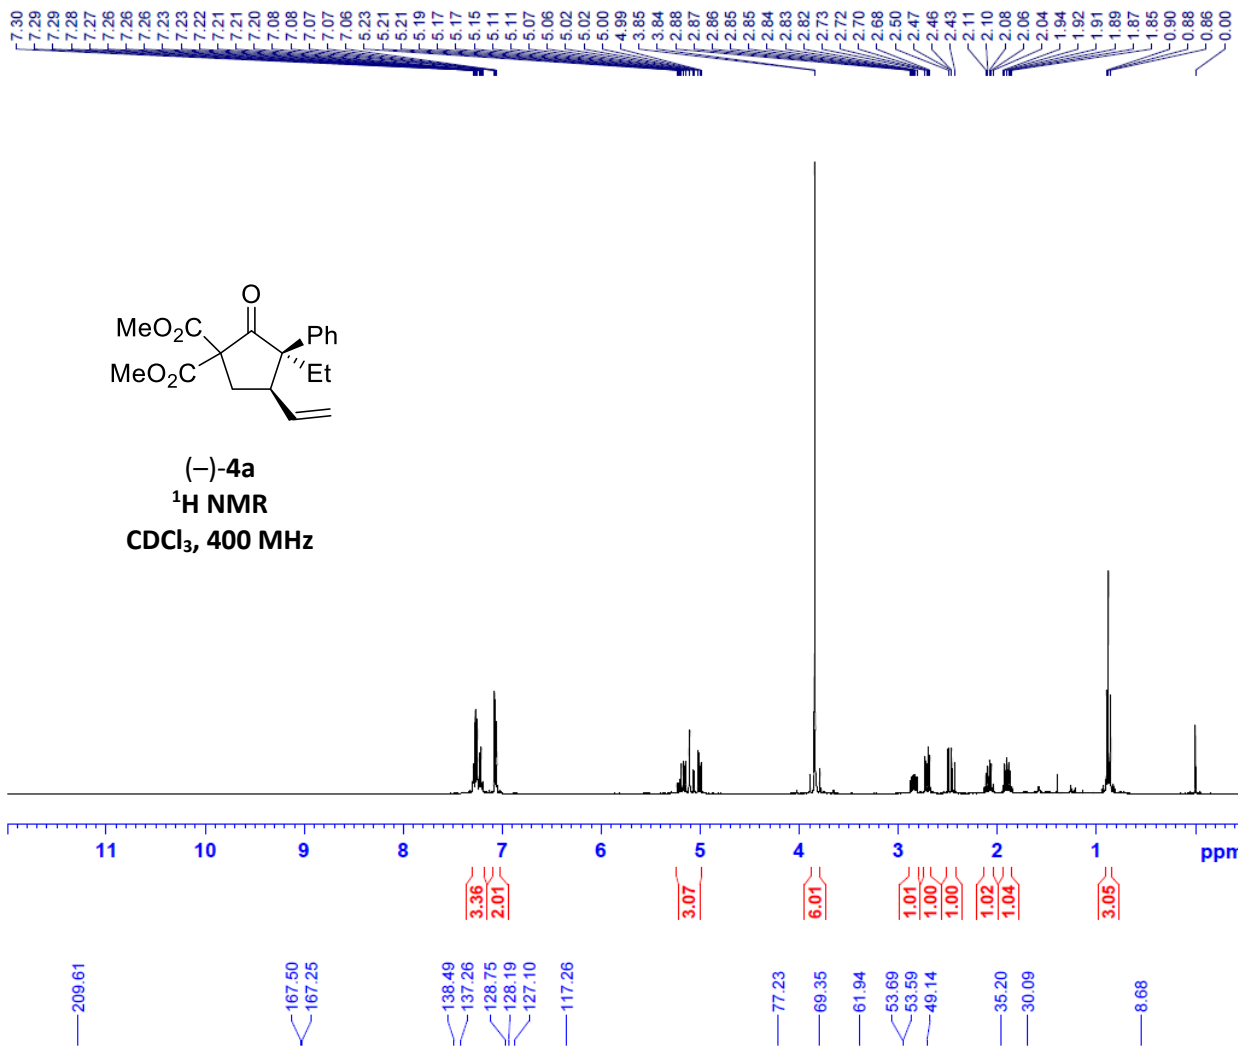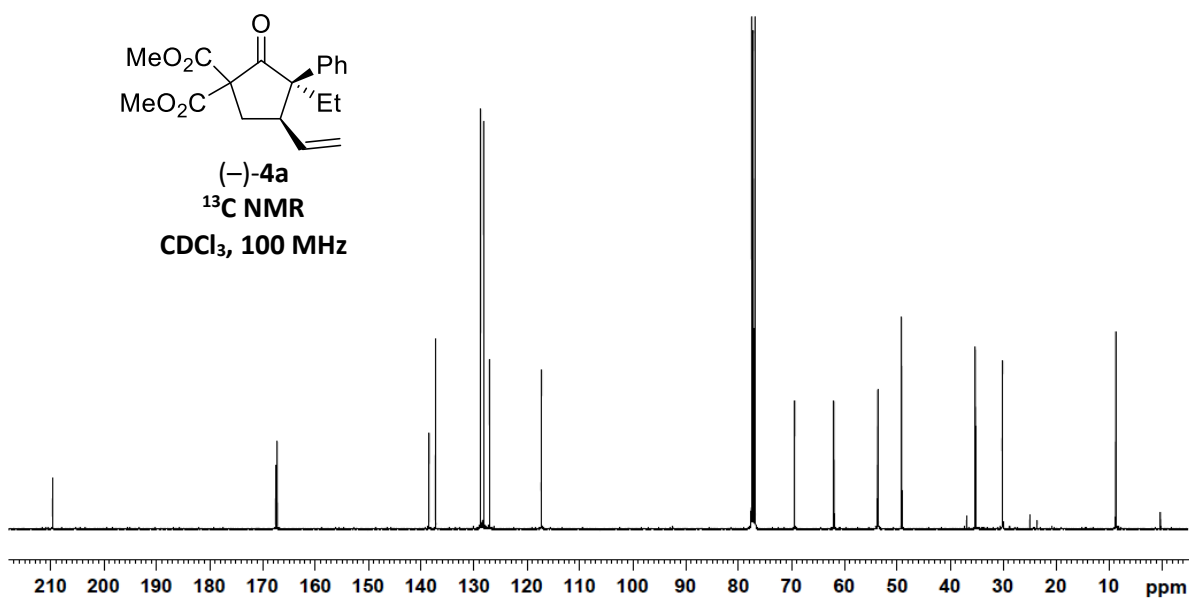

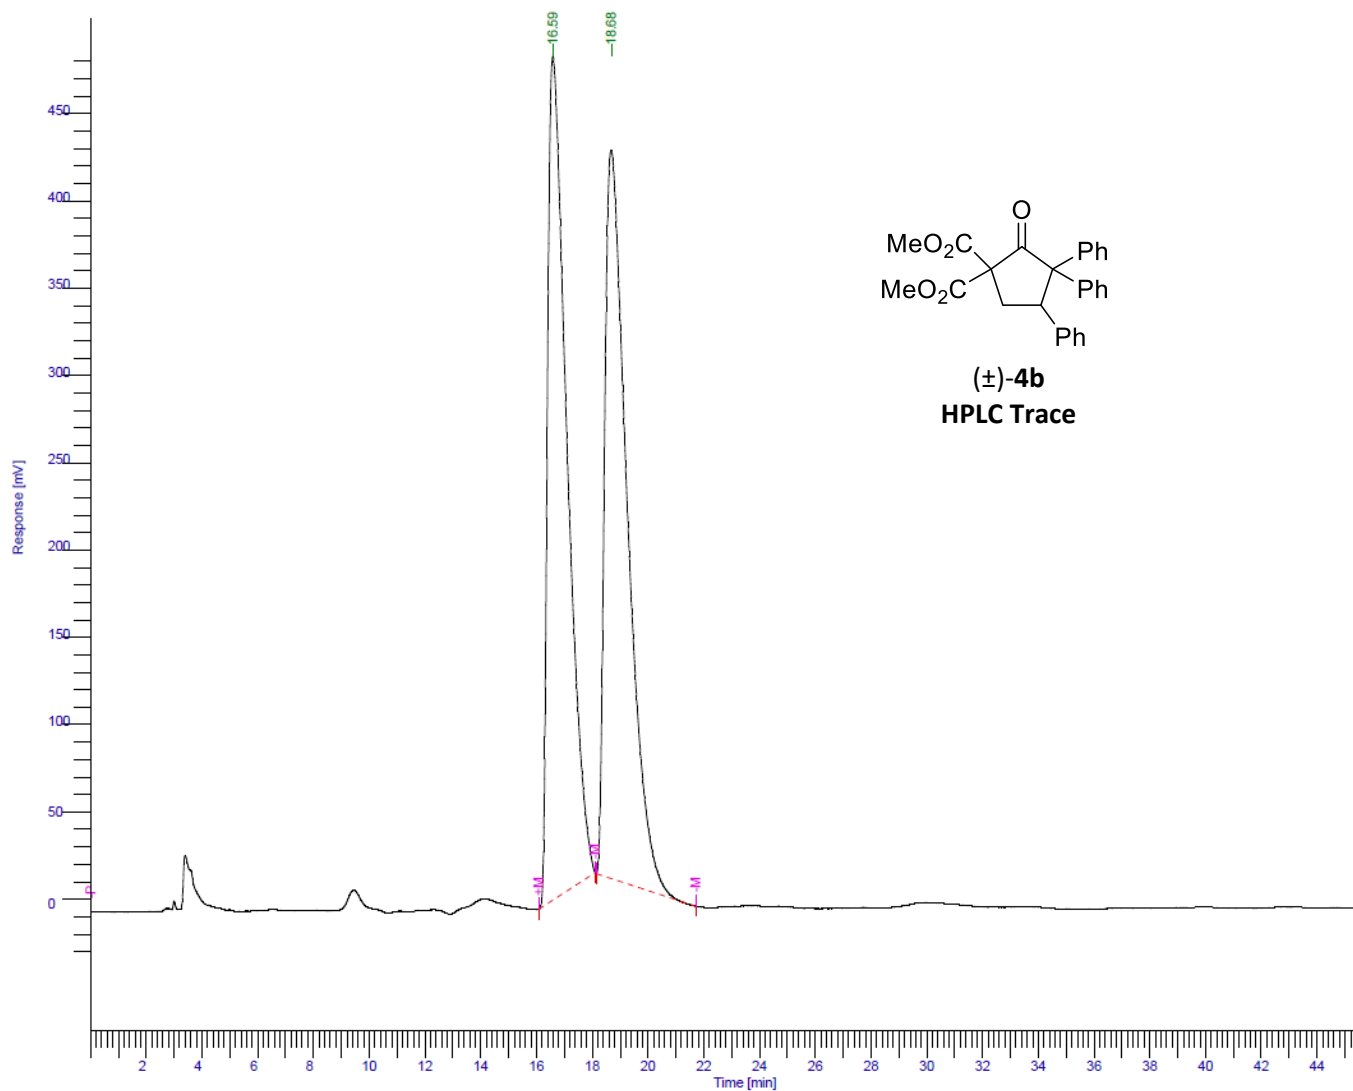

| Peak # | Time [min] | Area [ $\mu\text{V}\cdot\text{s}$ ] | Height [ $\mu\text{V}$ ] | Area [%] | Norm. Area [%] | BL  | Area/Height [s] |
|--------|------------|-------------------------------------|--------------------------|----------|----------------|-----|-----------------|
| 1      | 16.587     | 23386096.44                         | 483605.24                | 49.86    | 49.86          | *BB | 48.3578         |
| 2      | 18.678     | 23518633.48                         | 417248.10                | 50.14    | 50.14          | *BB | 56.3661         |
|        |            | 46904729.92                         | 900853.35                | 100.00   | 100.00         |     |                 |

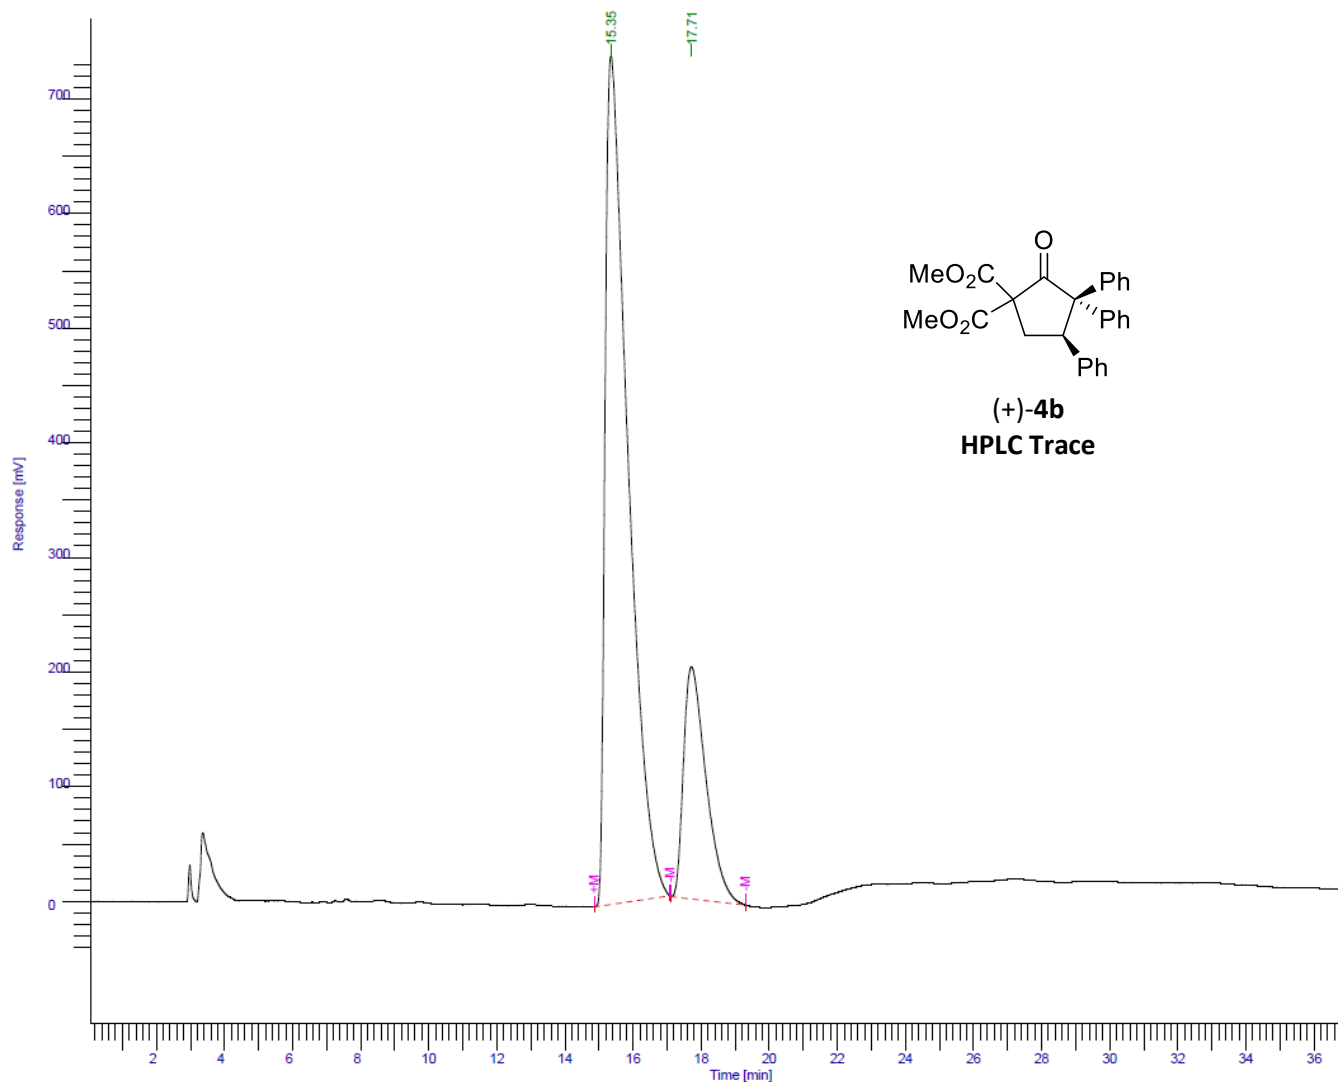

| Peak # | Time [min] | Area [μV·s] | Height [μV] | Area [%] | Norm. Area [%] | BL  | Area/Height [s] |
|--------|------------|-------------|-------------|----------|----------------|-----|-----------------|
| 1      | 15.349     | 34602069.19 | 740107.91   | 78.78    | 78.78          | *BB | 46.7527         |
| 2      | 17.713     | 9318954.79  | 202468.55   | 21.22    | 21.22          | *BB | 46.0267         |
|        |            | 43921023.97 | 942576.46   | 100.00   | 100.00         |     |                 |

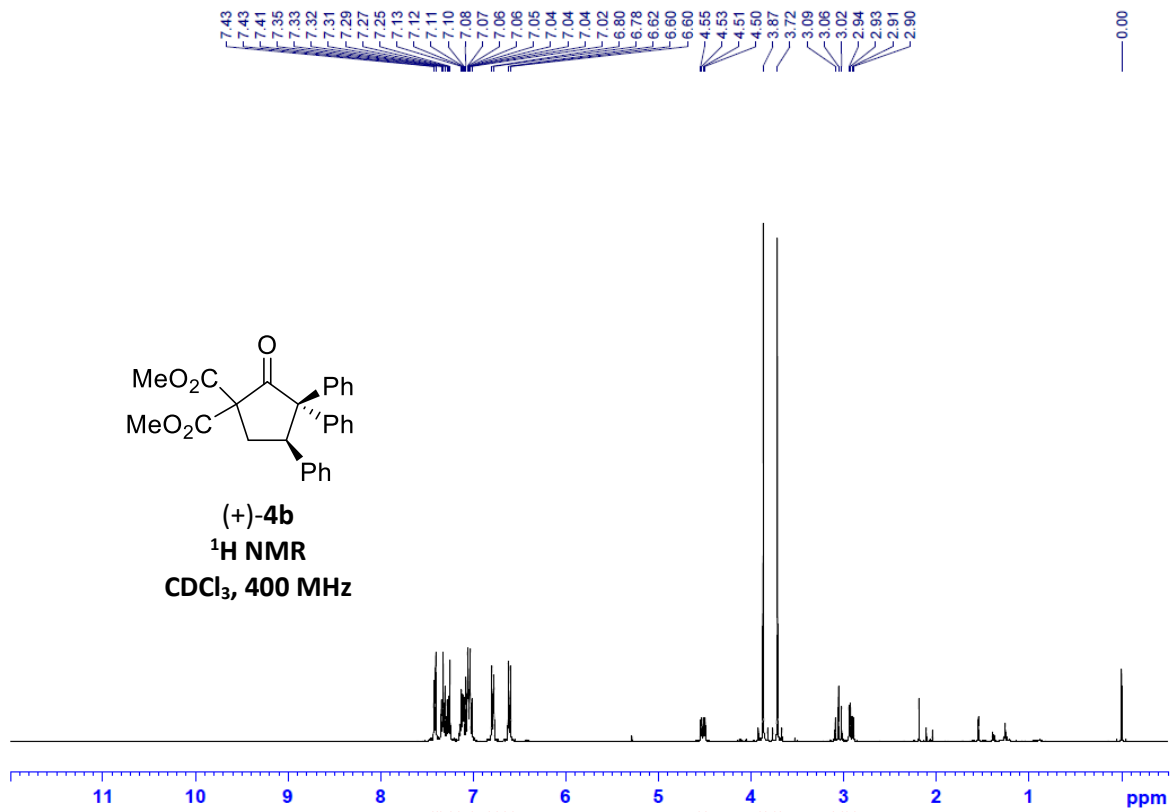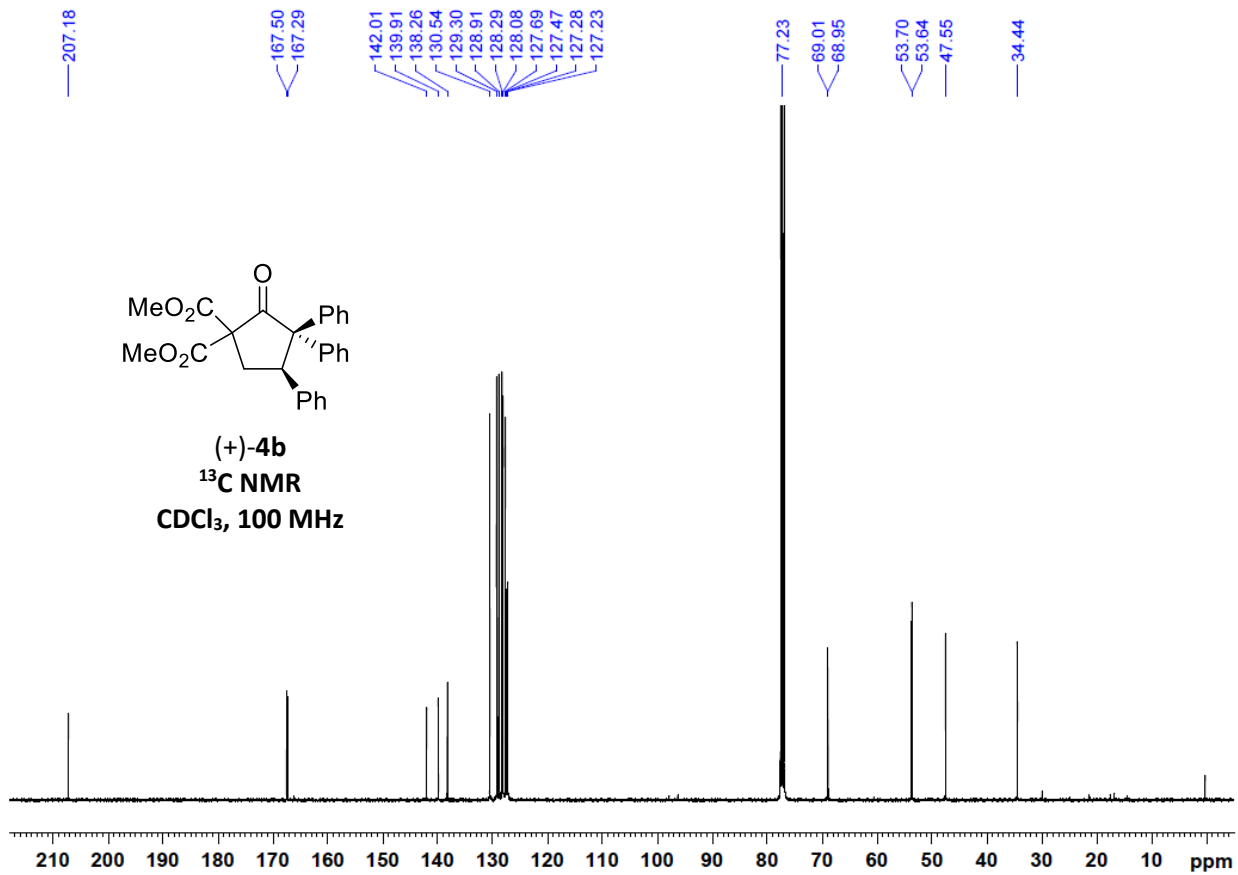

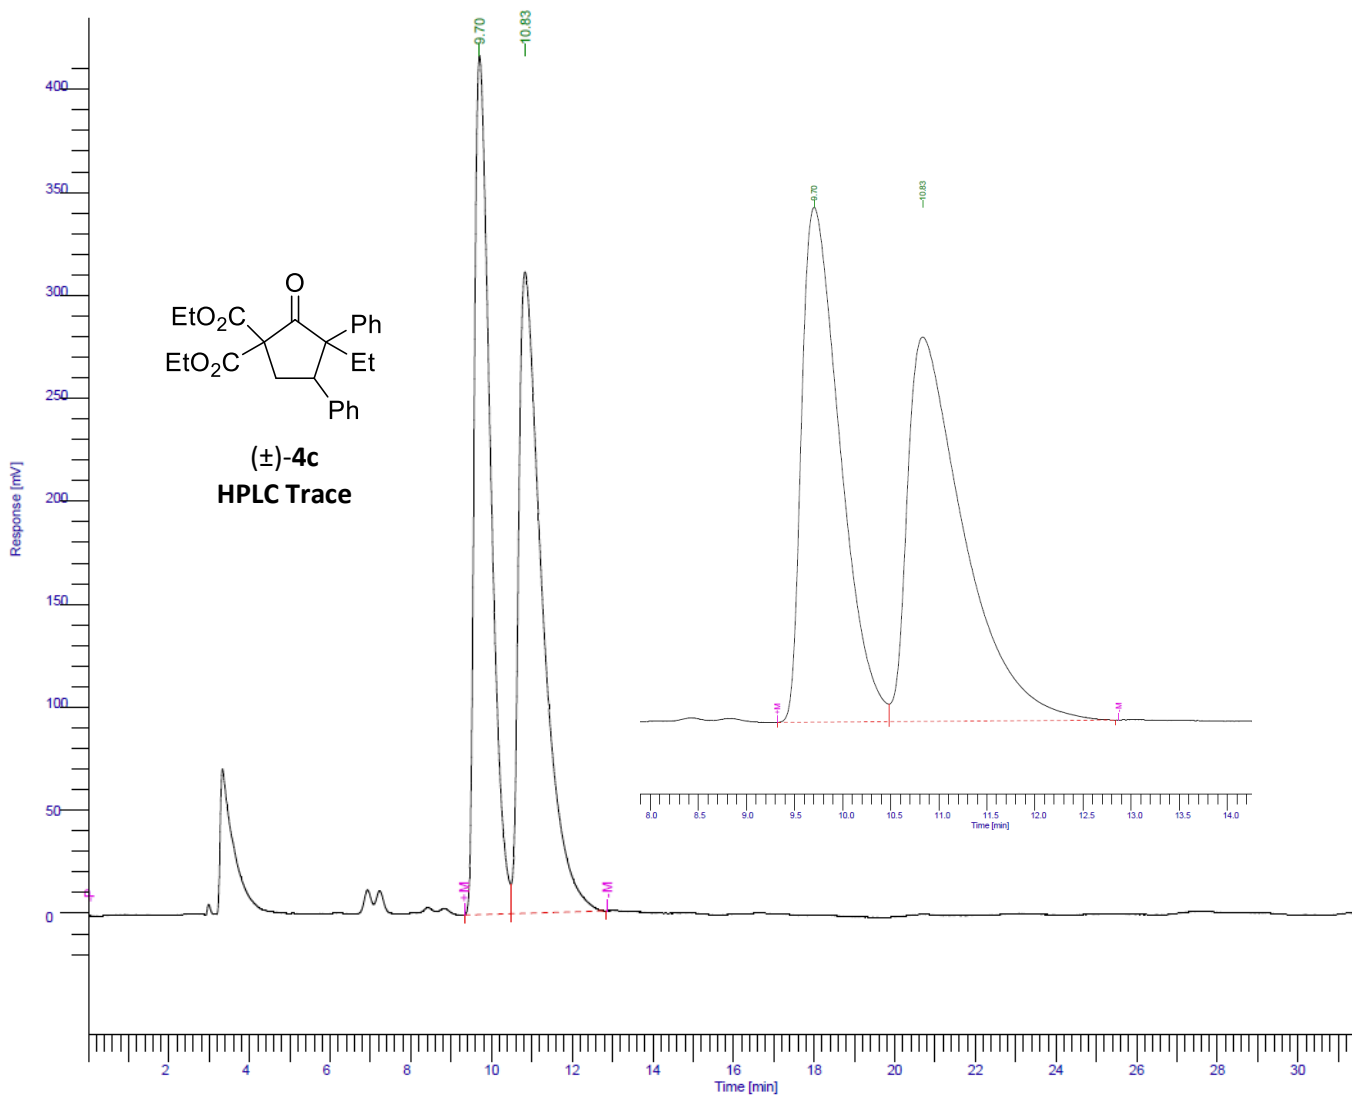

| Peak # | Time [min] | Area [ $\mu\text{V}\cdot\text{s}$ ] | Height [ $\mu\text{V}$ ] | Area [%] | Norm. Area [%] | BL  | Area/Height [s] |
|--------|------------|-------------------------------------|--------------------------|----------|----------------|-----|-----------------|
| 1      | 9.704      | 11569596.84                         | 416888.13                | 47.67    | 47.67          | *BV | 27.7523         |
| 2      | 10.833     | 12702248.48                         | 311243.59                | 52.33    | 52.33          | *VB | 40.8113         |
|        |            | 24271845.32                         | 728131.72                | 100.00   | 100.00         |     |                 |

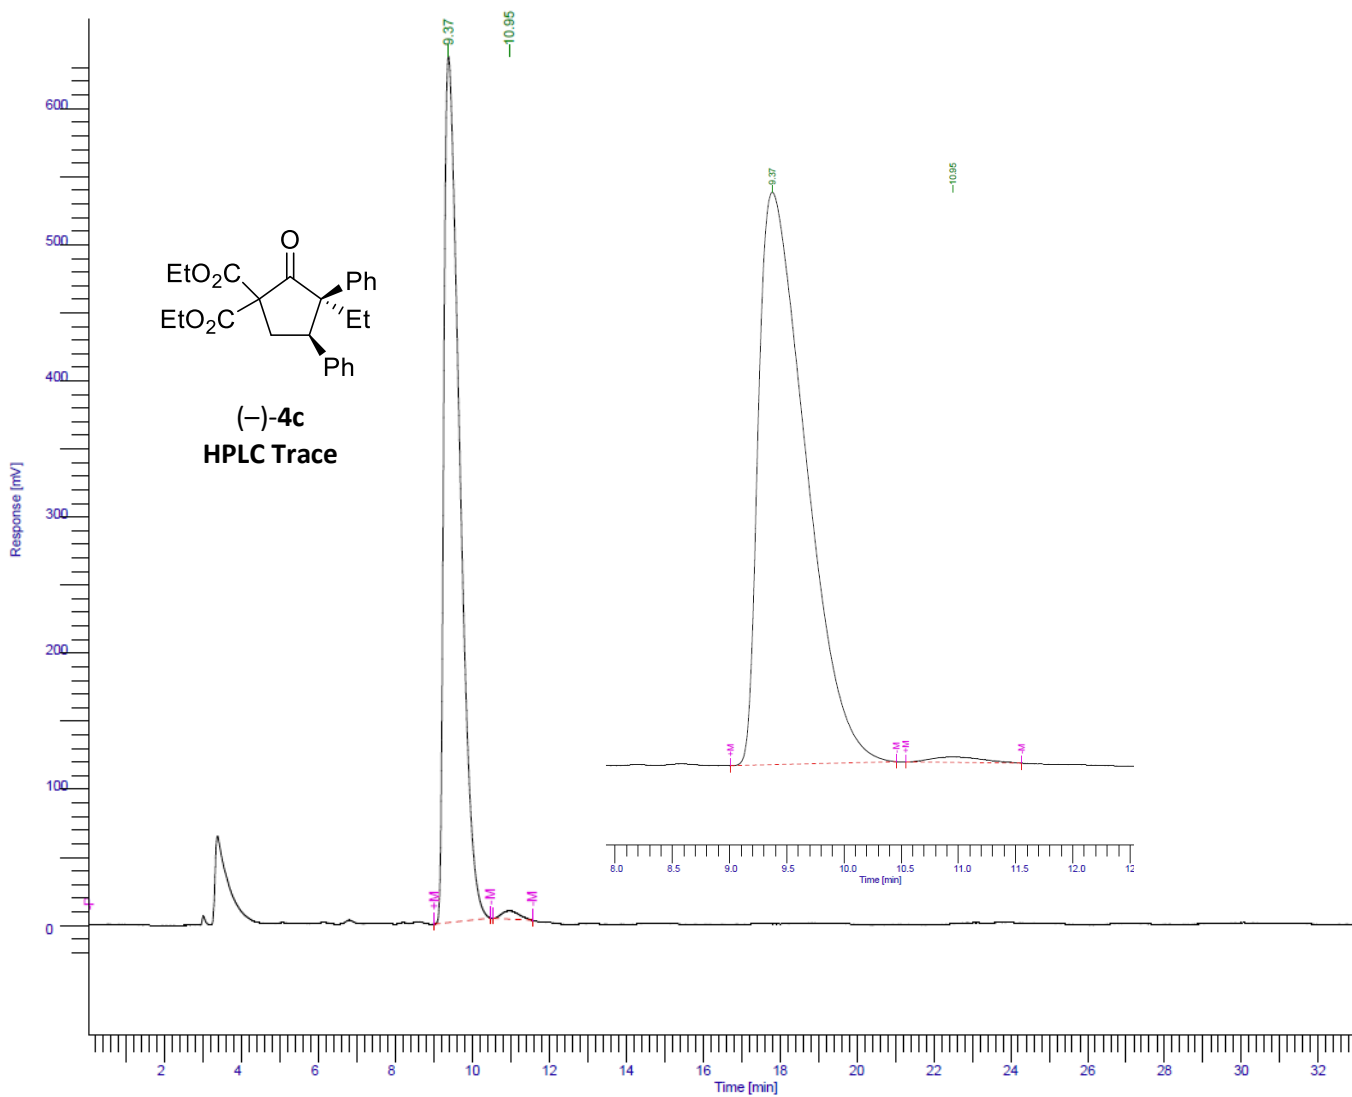

| Peak # | Time [min] | Area [ $\mu\text{V}\cdot\text{s}$ ] | Height [ $\mu\text{V}$ ] | Area [%] | Norm. Area [%] | BL  | Area/Height [s] |
|--------|------------|-------------------------------------|--------------------------|----------|----------------|-----|-----------------|
| 1      | 9.373      | 18184209.90                         | 636253.20                | 98.94    | 98.94          | *BB | 28.5801         |
| 2      | 10.952     | 194580.66                           | 6161.40                  | 1.06     | 1.06           | *BB | 31.5806         |
|        |            | 18378790.56                         | 642414.60                | 100.00   | 100.00         |     |                 |

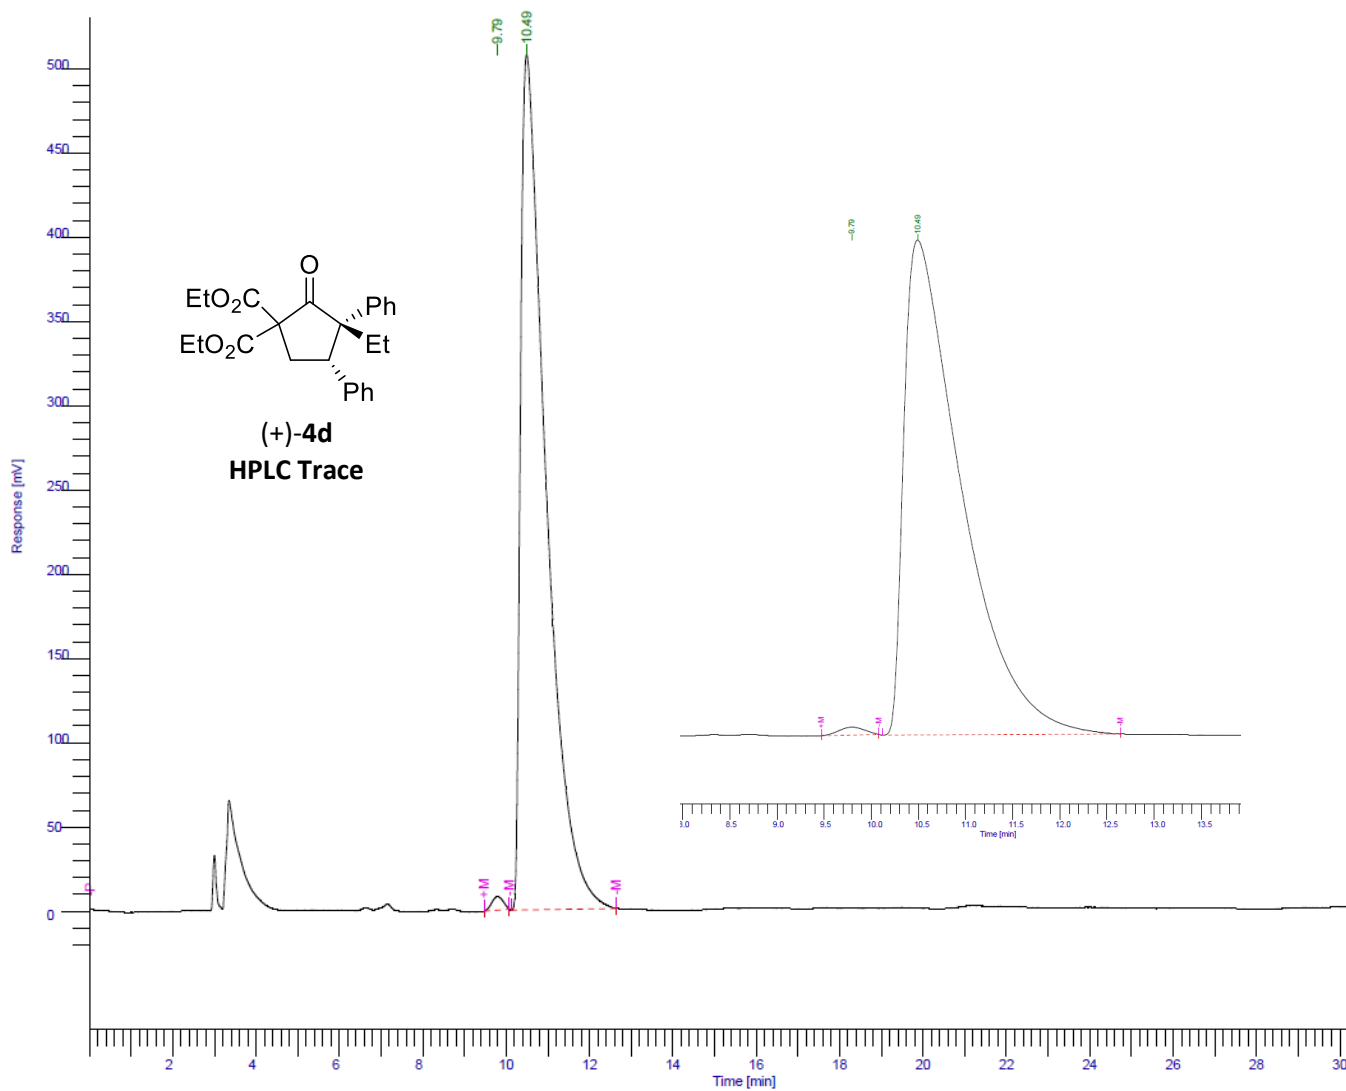

| Peak # | Time [min] | Area [ $\mu\text{V}\cdot\text{s}$ ] | Height [ $\mu\text{V}$ ] | Area [%] | Norm. Area [%] | BL  | Area/Height [s] |
|--------|------------|-------------------------------------|--------------------------|----------|----------------|-----|-----------------|
| 1      | 9.791      | 152214.89                           | 7995.07                  | 0.70     | 0.70           | *BB | 19.0386         |
| 2      | 10.491     | 21440723.67                         | 507392.20                | 99.30    | 99.30          | *BB | 42.2567         |
|        |            | 21592938.56                         | 515387.27                | 100.00   | 100.00         |     |                 |

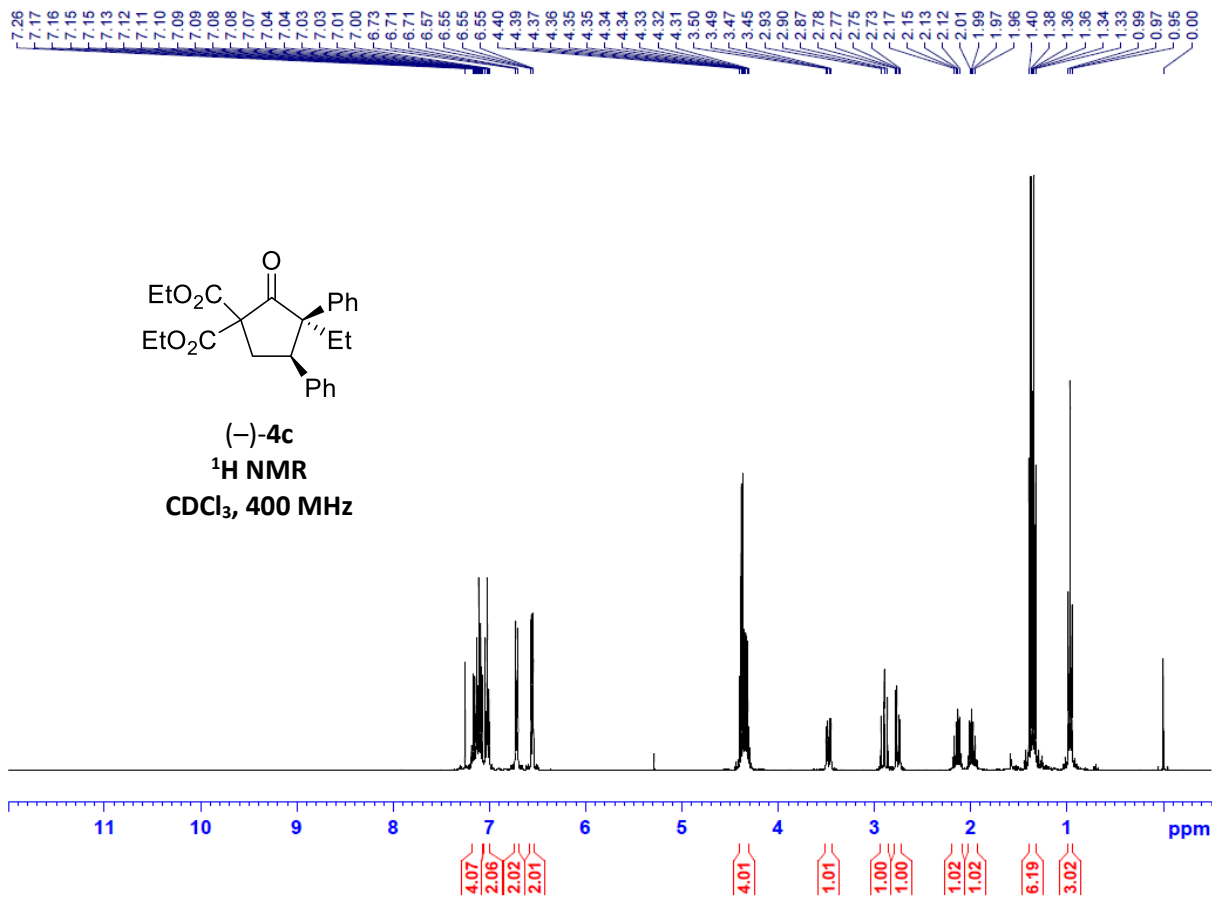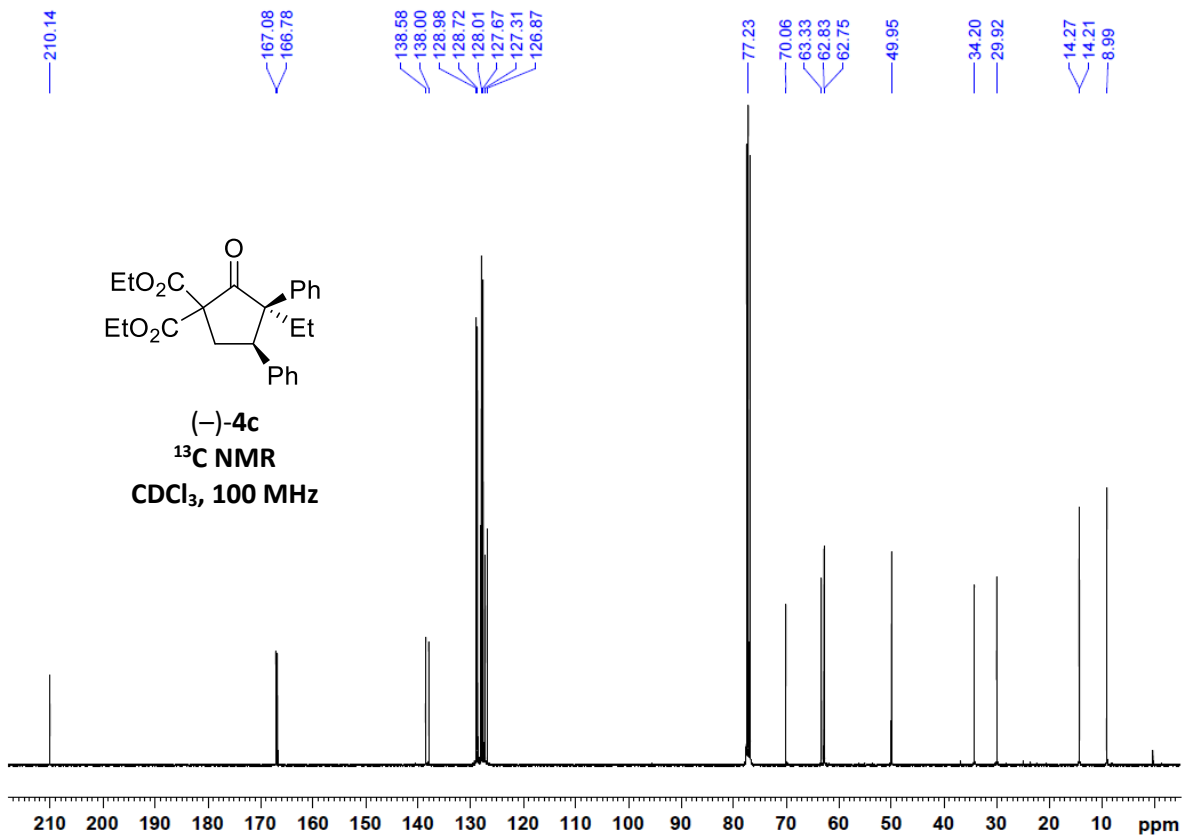



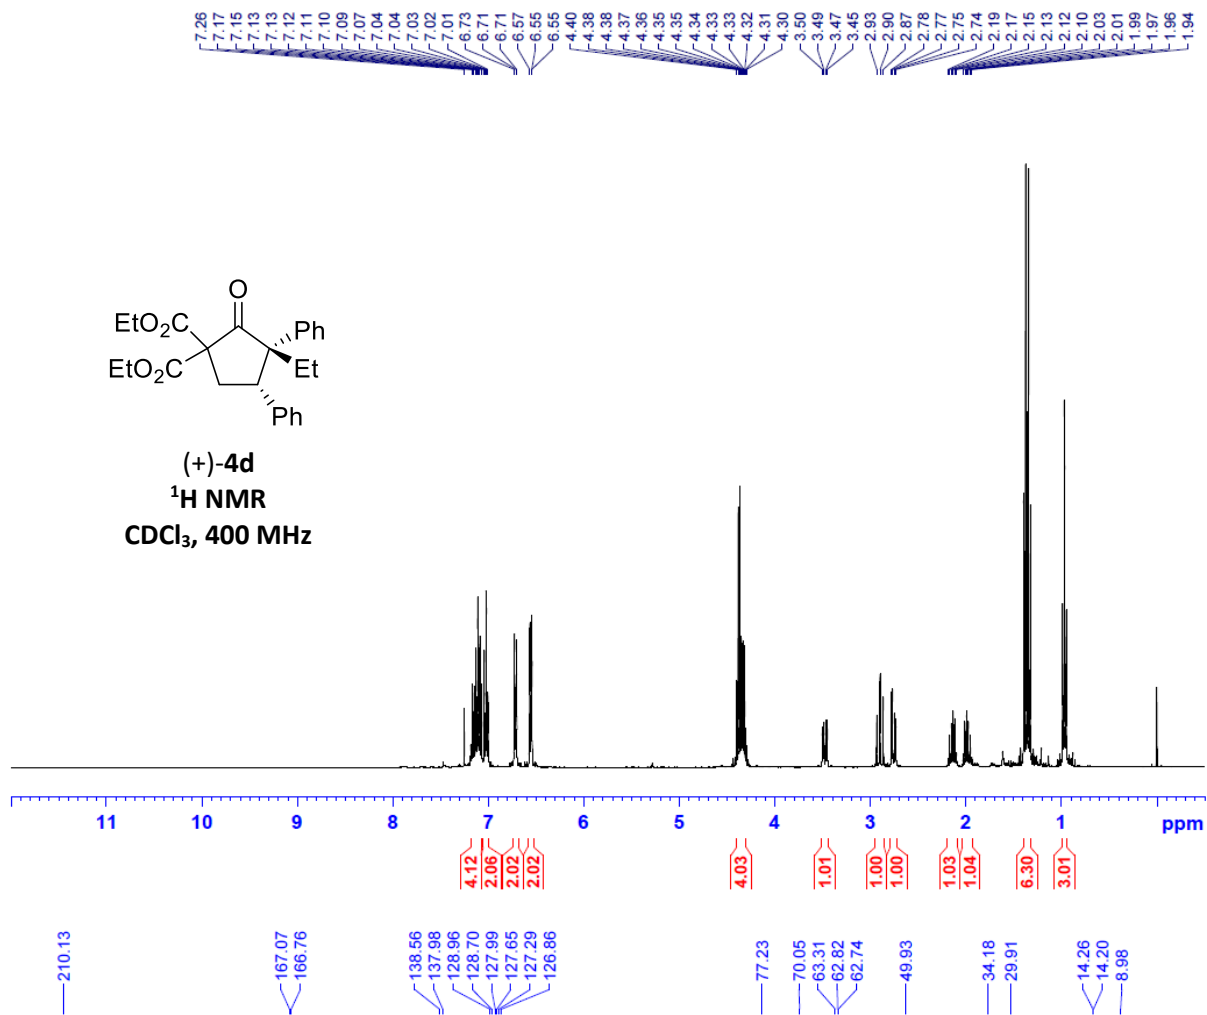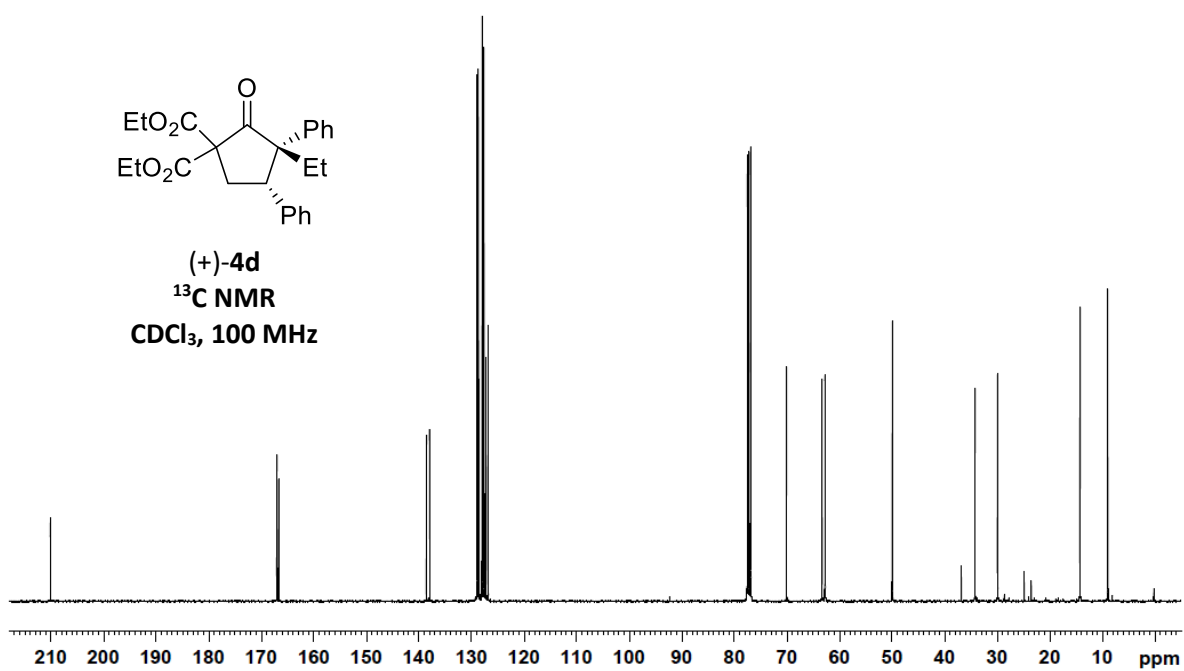

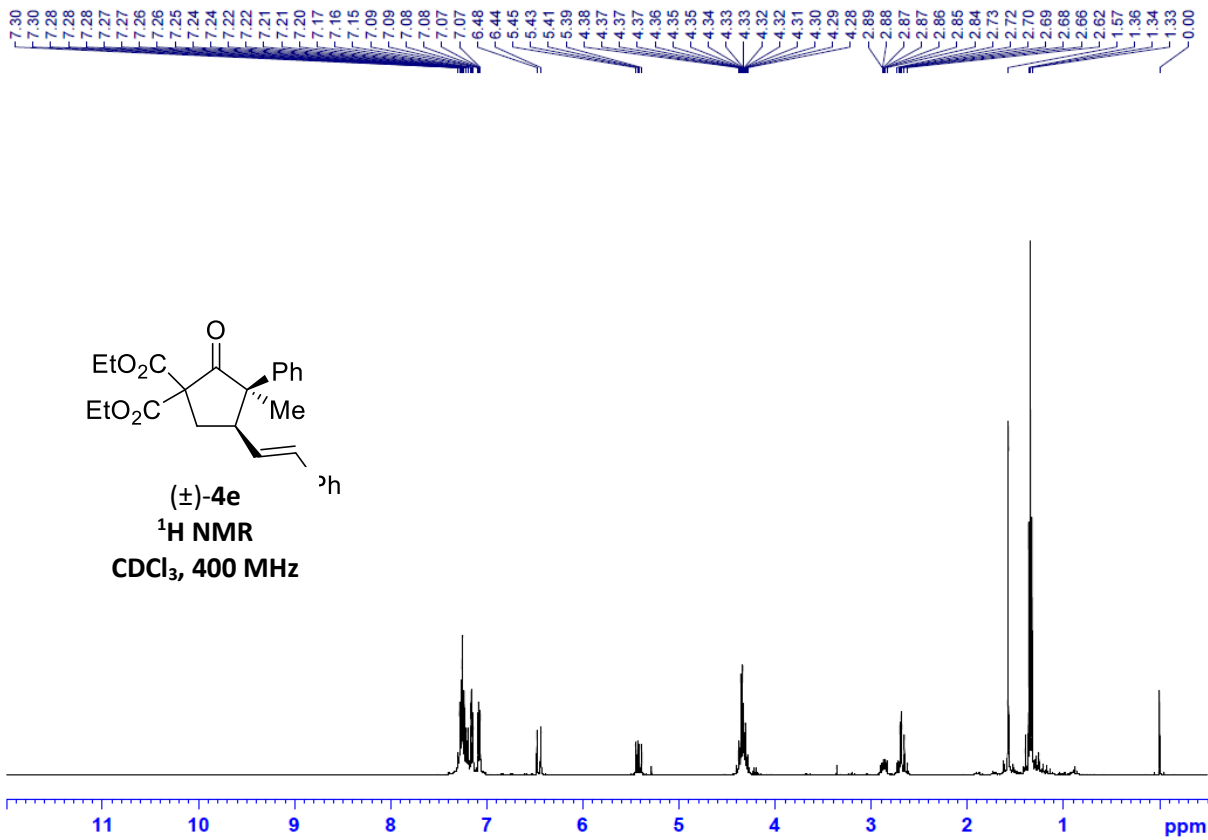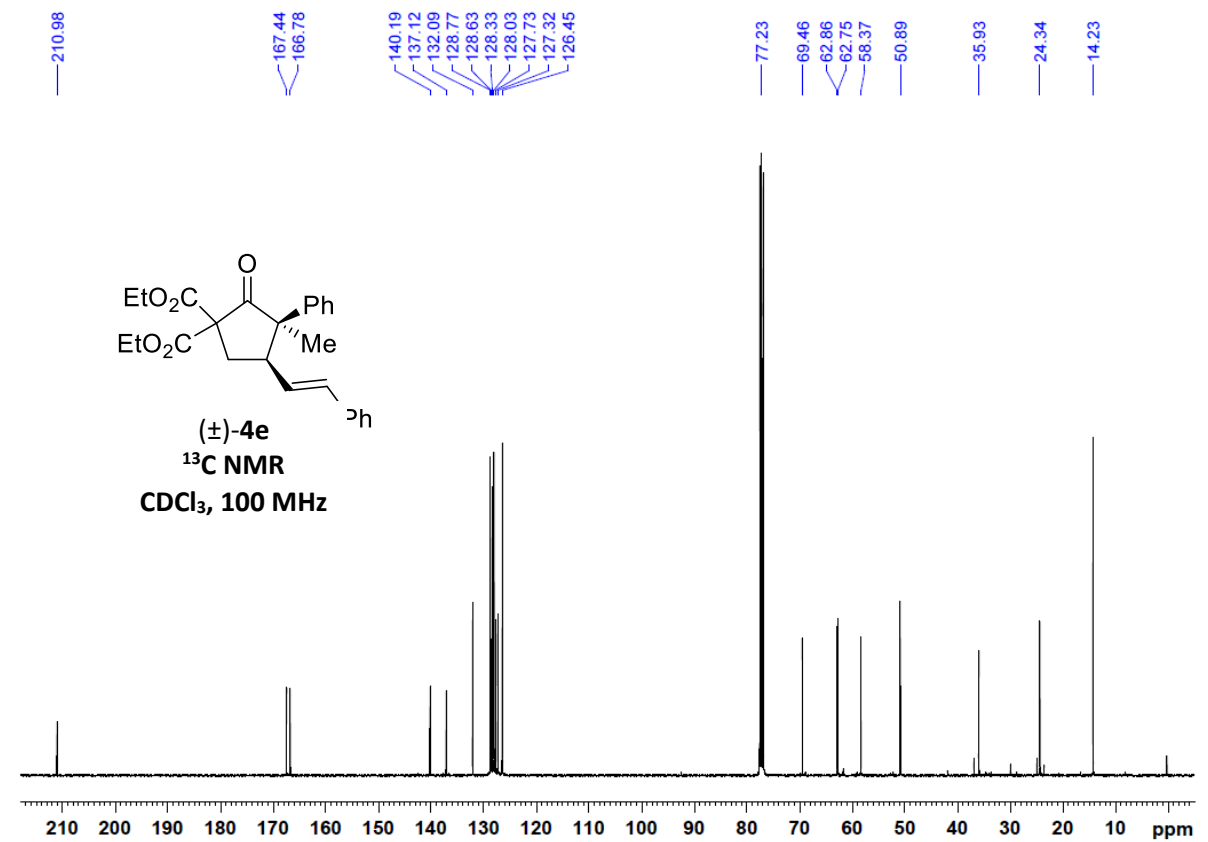

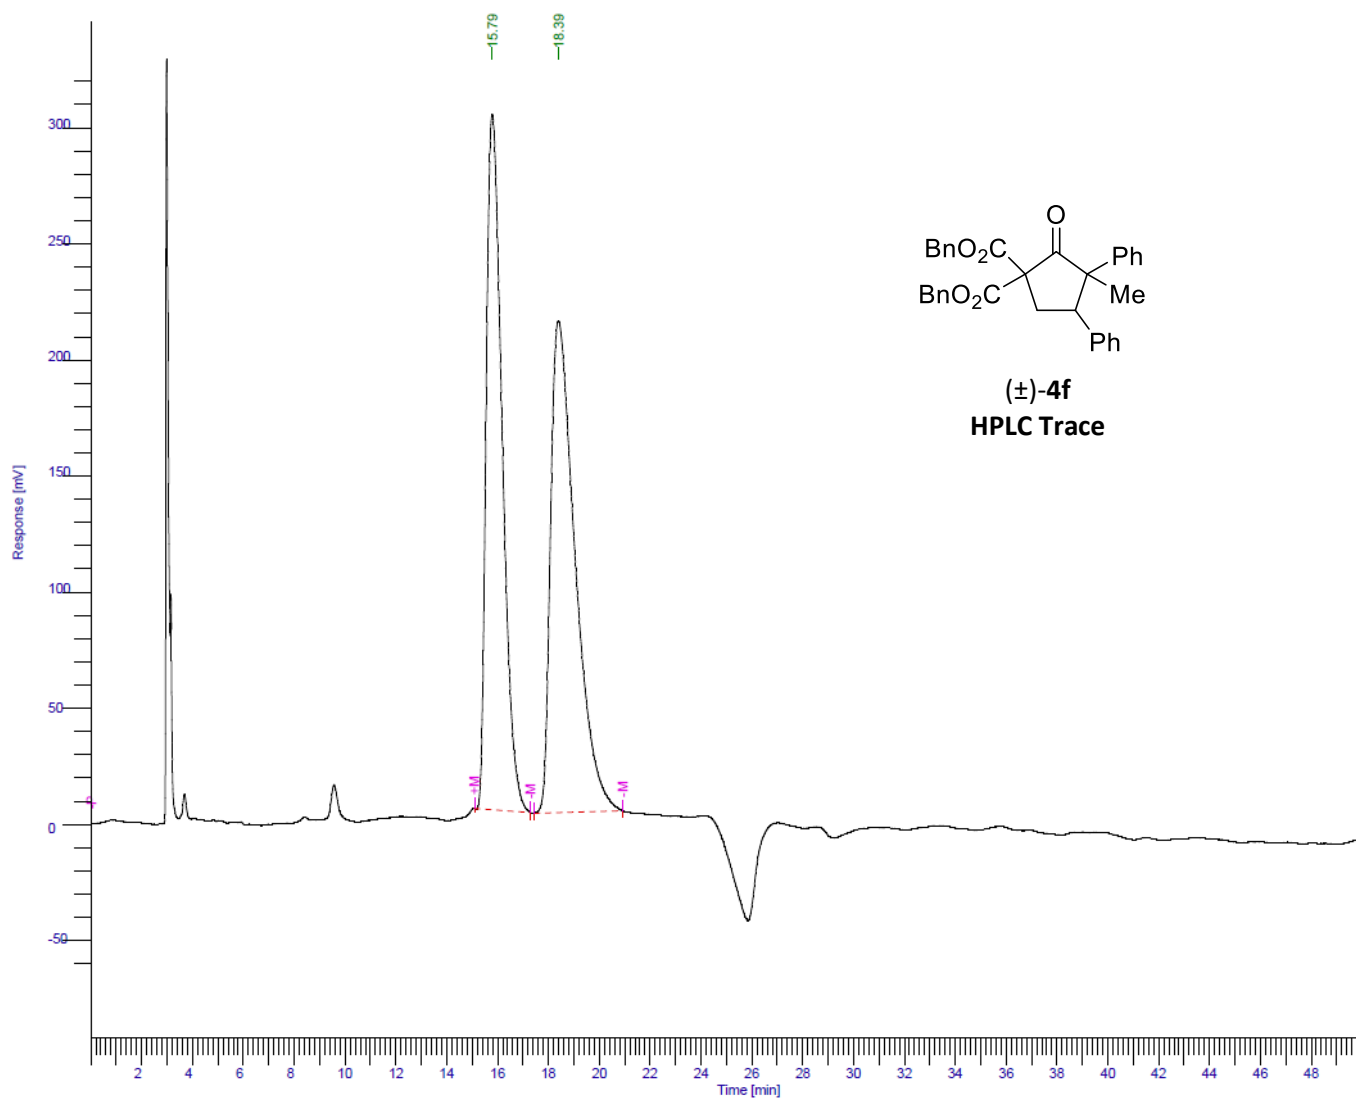

| Peak # | Time [min] | Area [ $\mu\text{V}\cdot\text{s}$ ] | Height [ $\mu\text{V}$ ] | Area [%] | Norm. Area [%] | BL  | Area/Height [s] |
|--------|------------|-------------------------------------|--------------------------|----------|----------------|-----|-----------------|
| 1      | 15.787     | 13069936.86                         | 299608.69                | 47.96    | 47.96          | *BB | 43.6234         |
| 2      | 18.390     | 14184331.50                         | 211820.11                | 52.04    | 52.04          | *BB | 66.9640         |
|        |            | 27254268.35                         | 511428.81                | 100.00   | 100.00         |     |                 |

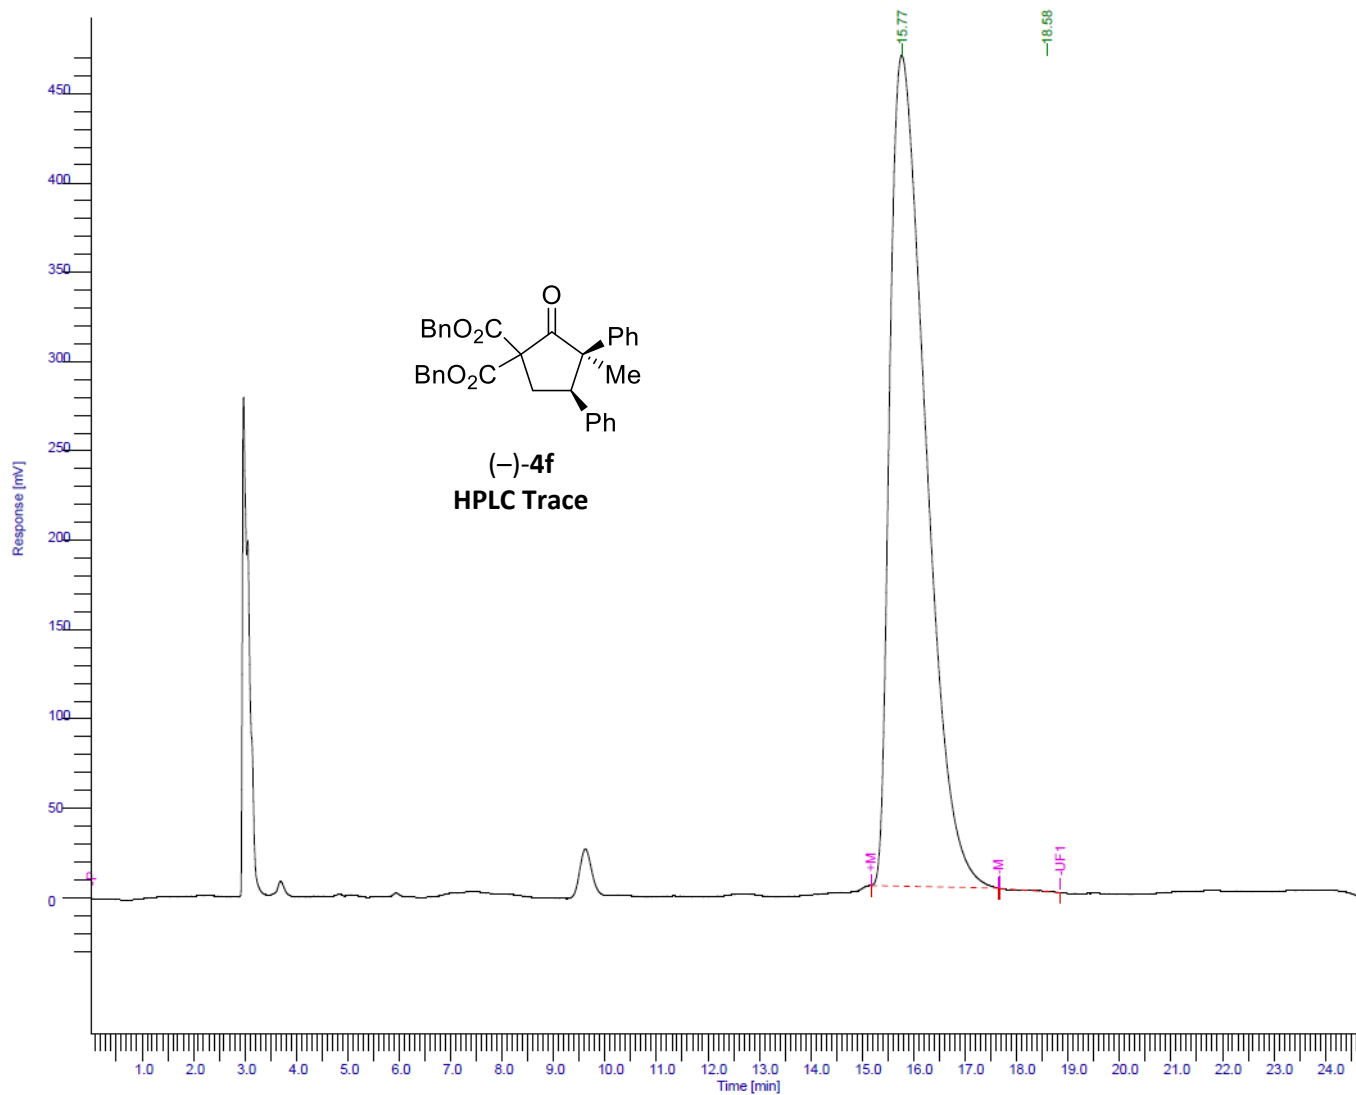

| Peak # | Time [min] | Area [ $\mu\text{V}\cdot\text{s}$ ] | Height [ $\mu\text{V}$ ] | Area [%] | Norm. Area [%] | BL  | Area/Height [s] |
|--------|------------|-------------------------------------|--------------------------|----------|----------------|-----|-----------------|
| 1      | 15.767     | 22522981.11                         | 465004.14                | 99.97    | 99.97          | *BB | 48.4361         |
| 2      | 18.583     | 7487.58                             | 358.23                   | 0.03     | 0.03           | *MM | 20.9019         |
|        |            | 22530468.69                         | 465362.36                | 100.00   | 100.00         |     |                 |

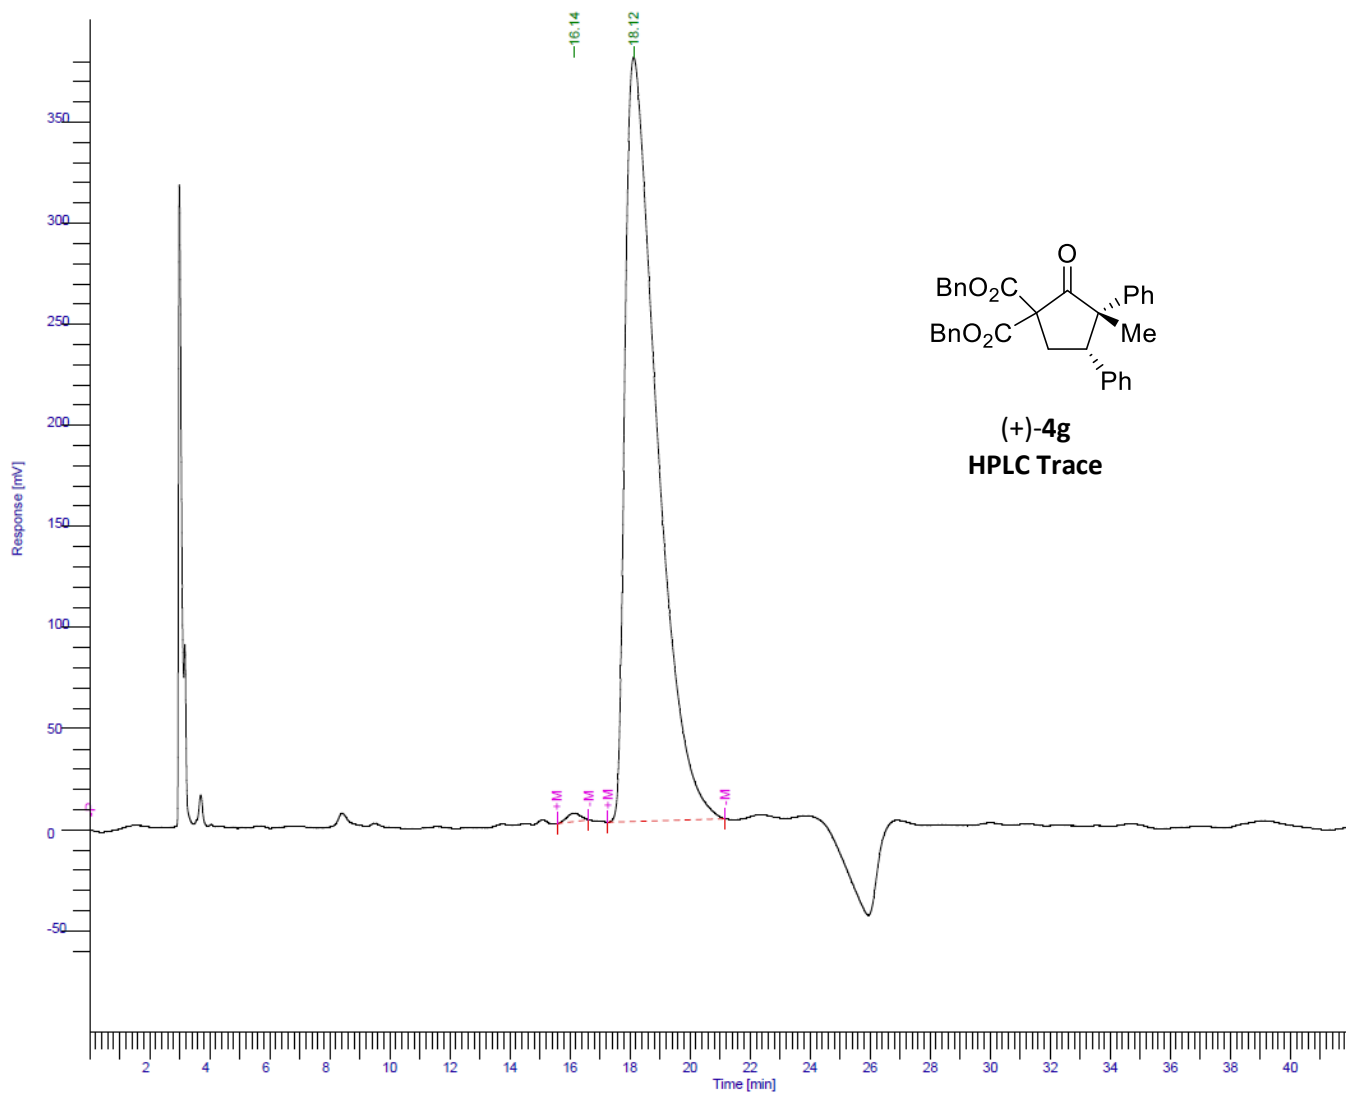

| Peak # | Time [min] | Area [ $\mu\text{V}\cdot\text{s}$ ] | Height [ $\mu\text{V}$ ] | Area [%] | Norm. Area [%] | BL  | Area/Height [s] |
|--------|------------|-------------------------------------|--------------------------|----------|----------------|-----|-----------------|
| 1      | 16.143     | 135074.83                           | 4123.13                  | 0.48     | 0.48           | *BB | 32.7603         |
| 2      | 18.121     | 27881097.37                         | 377989.68                | 99.52    | 99.52          | *BB | 73.7615         |
|        |            | 28016172.20                         | 382112.81                | 100.00   | 100.00         |     |                 |

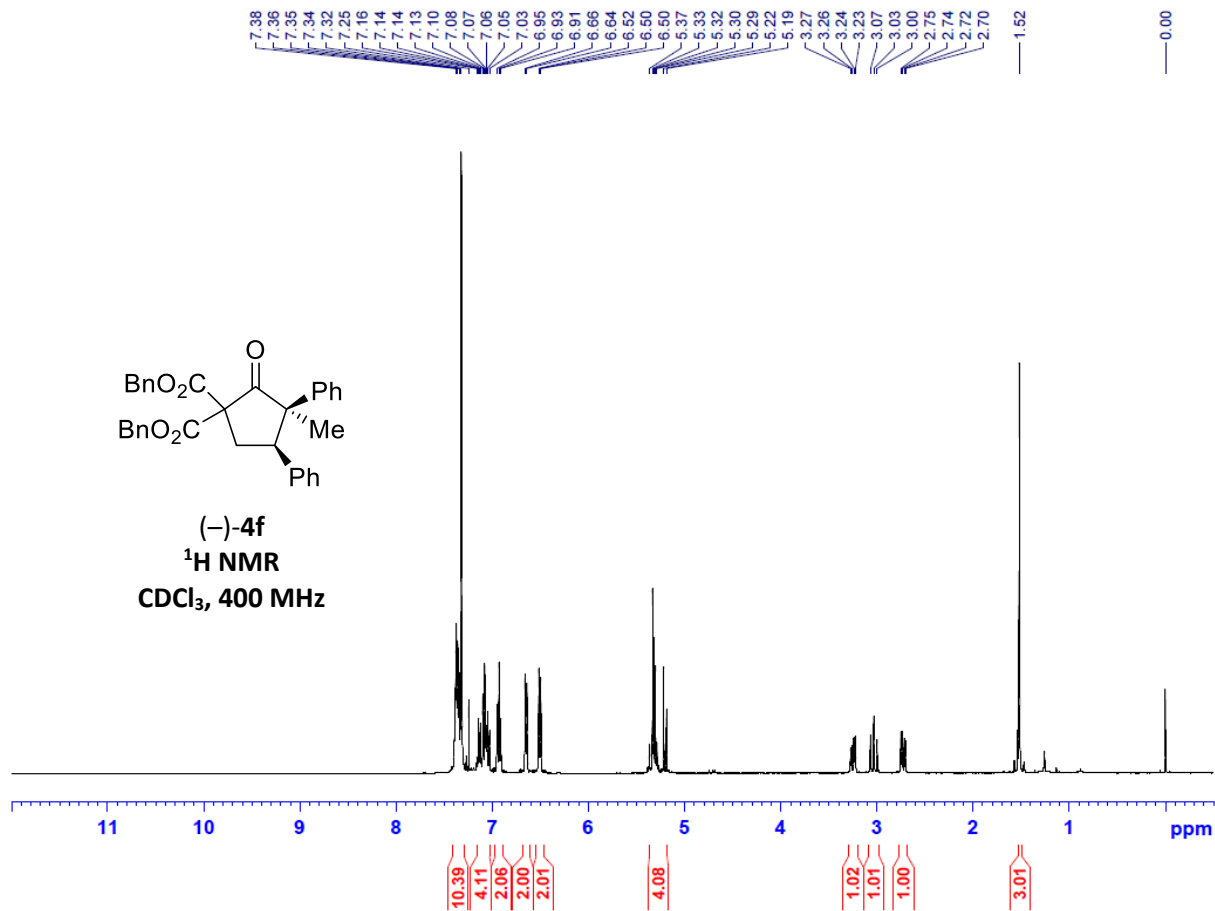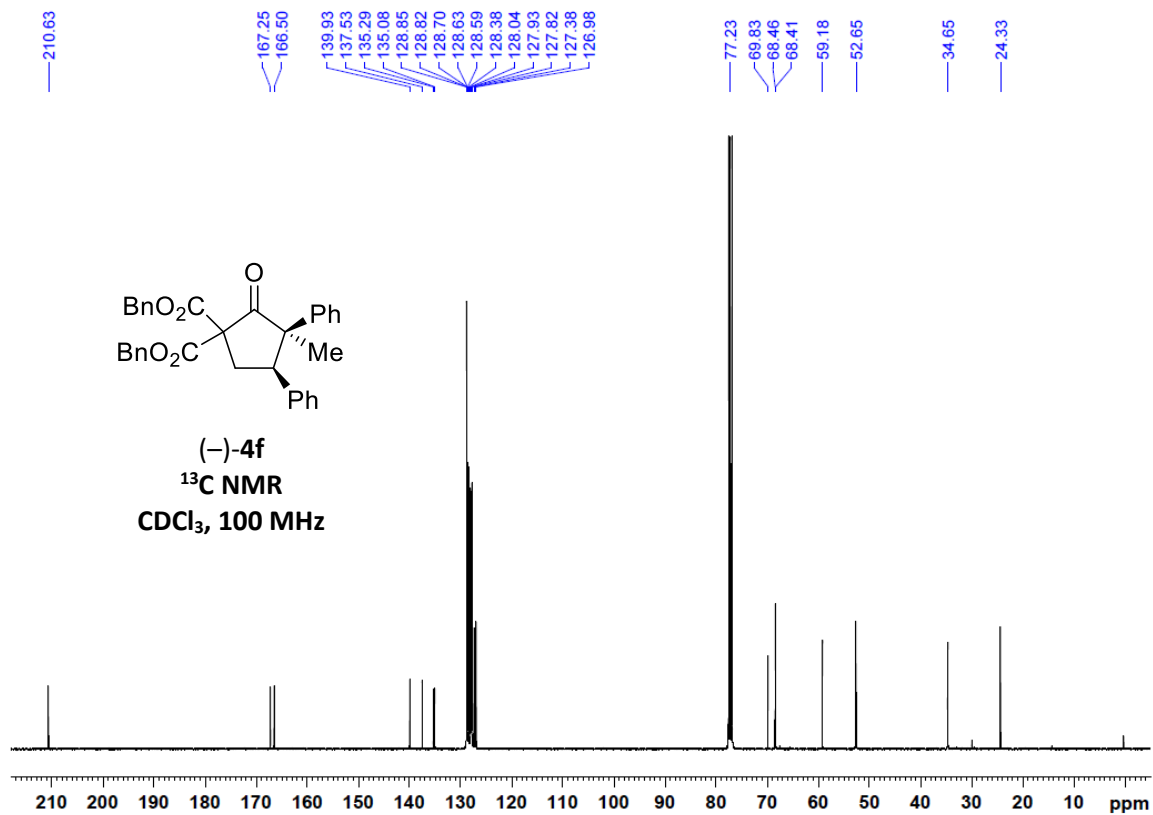

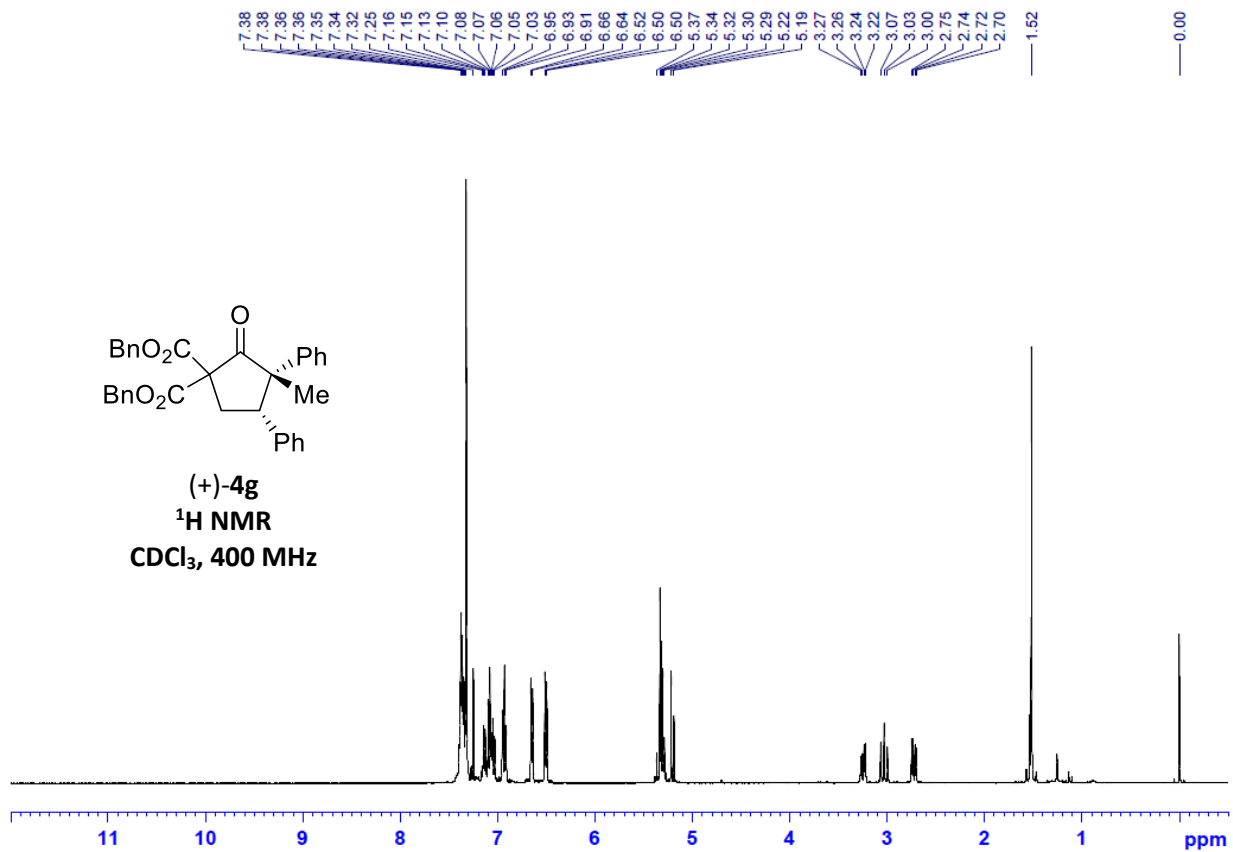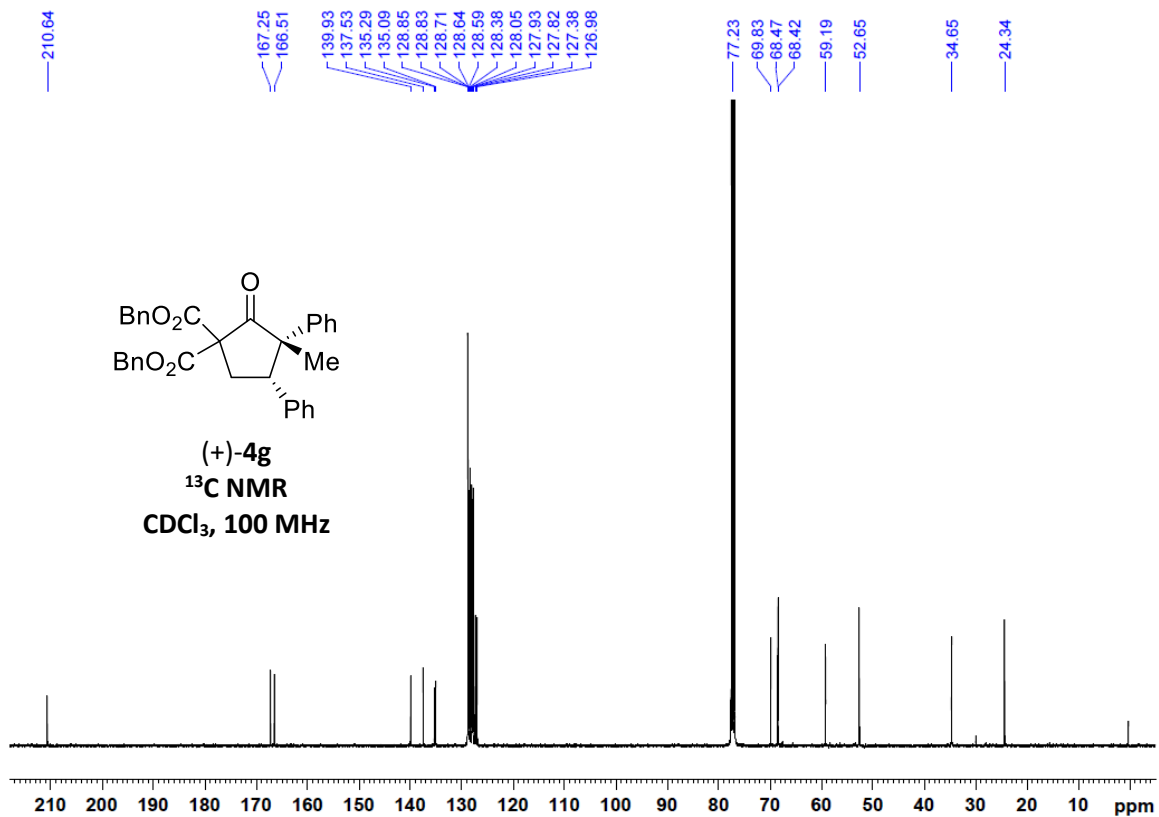

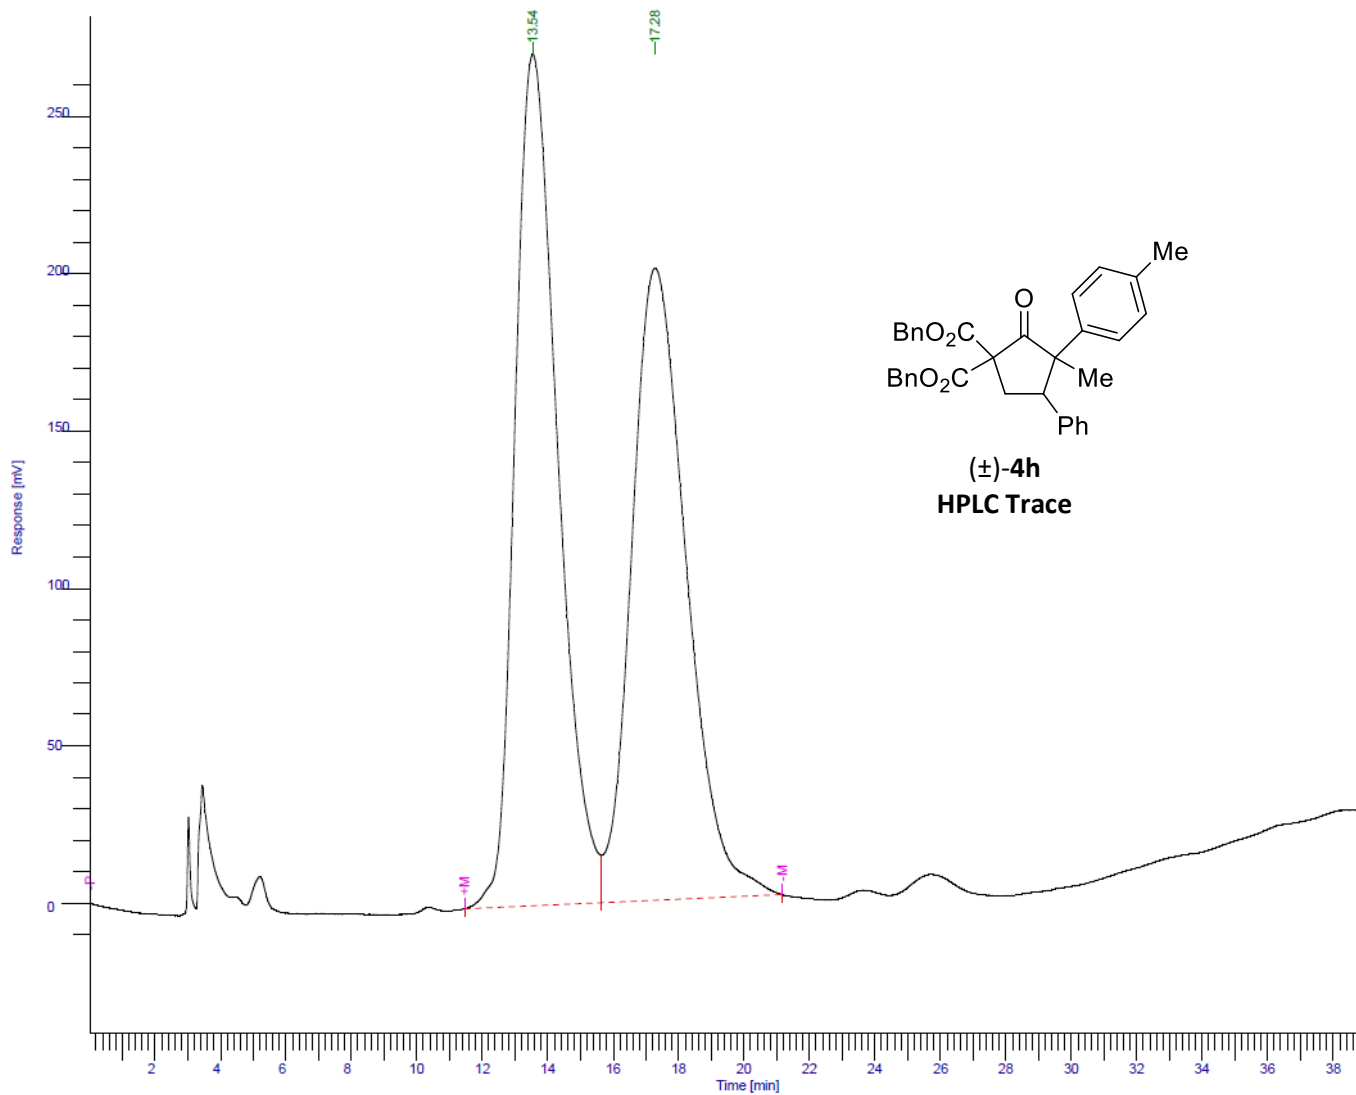

| Peak # | Time [min] | Area [ $\mu\text{V}\cdot\text{s}$ ] | Height [ $\mu\text{V}$ ] | Area [%] | Norm. Area [%] | BL  | Area/Height [s] |
|--------|------------|-------------------------------------|--------------------------|----------|----------------|-----|-----------------|
| 1      | 13.543     | 24640510.45                         | 270626.27                | 51.35    | 51.35          | *BV | 91.0500         |
| 2      | 17.283     | 23340288.76                         | 200856.88                | 48.65    | 48.65          | *VB | 116.2036        |
|        |            | 47980799.21                         | 471483.14                | 100.00   | 100.00         |     |                 |



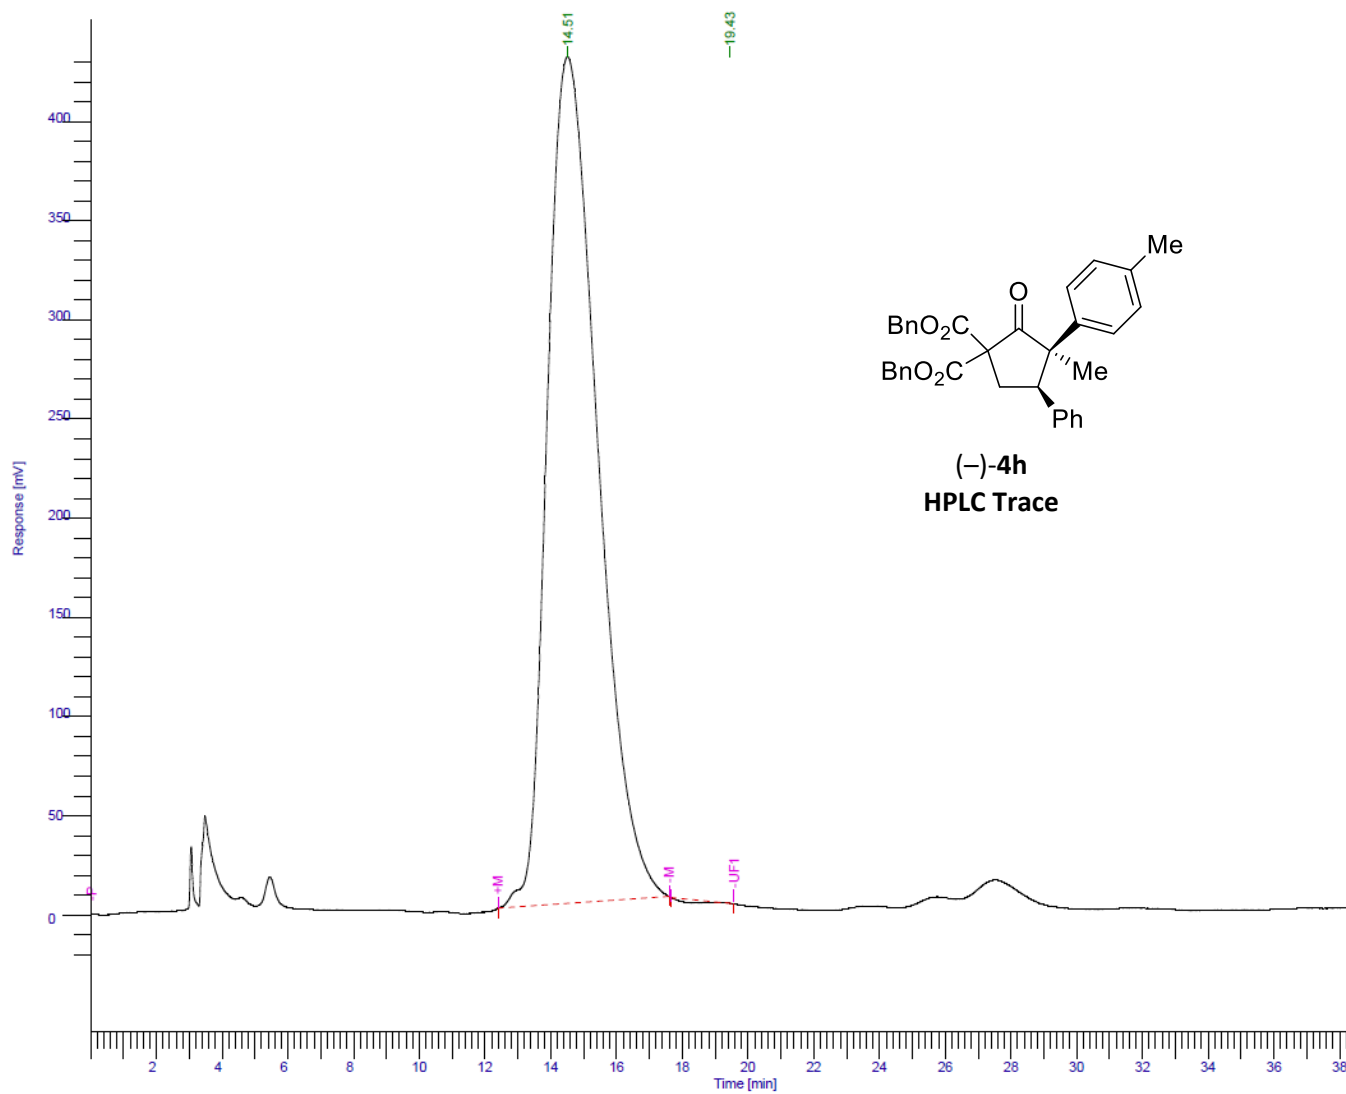

| Peak # | Time [min] | Area [ $\mu\text{V}\cdot\text{s}$ ] | Height [ $\mu\text{V}$ ] | Area [%] | Norm. Area [%] | BL  | Area/Height [s] |
|--------|------------|-------------------------------------|--------------------------|----------|----------------|-----|-----------------|
| 1      | 14.509     | 45365346.74                         | 426678.74                | 100.00   | 100.00         | *BB | 106.3220        |
| 2      | 19.433     | 1524.54                             | 158.69                   | 0.00     | 0.00           | *MM | 9.6070          |
|        |            | 45366871.28                         | 426837.43                | 100.00   | 100.00         |     |                 |

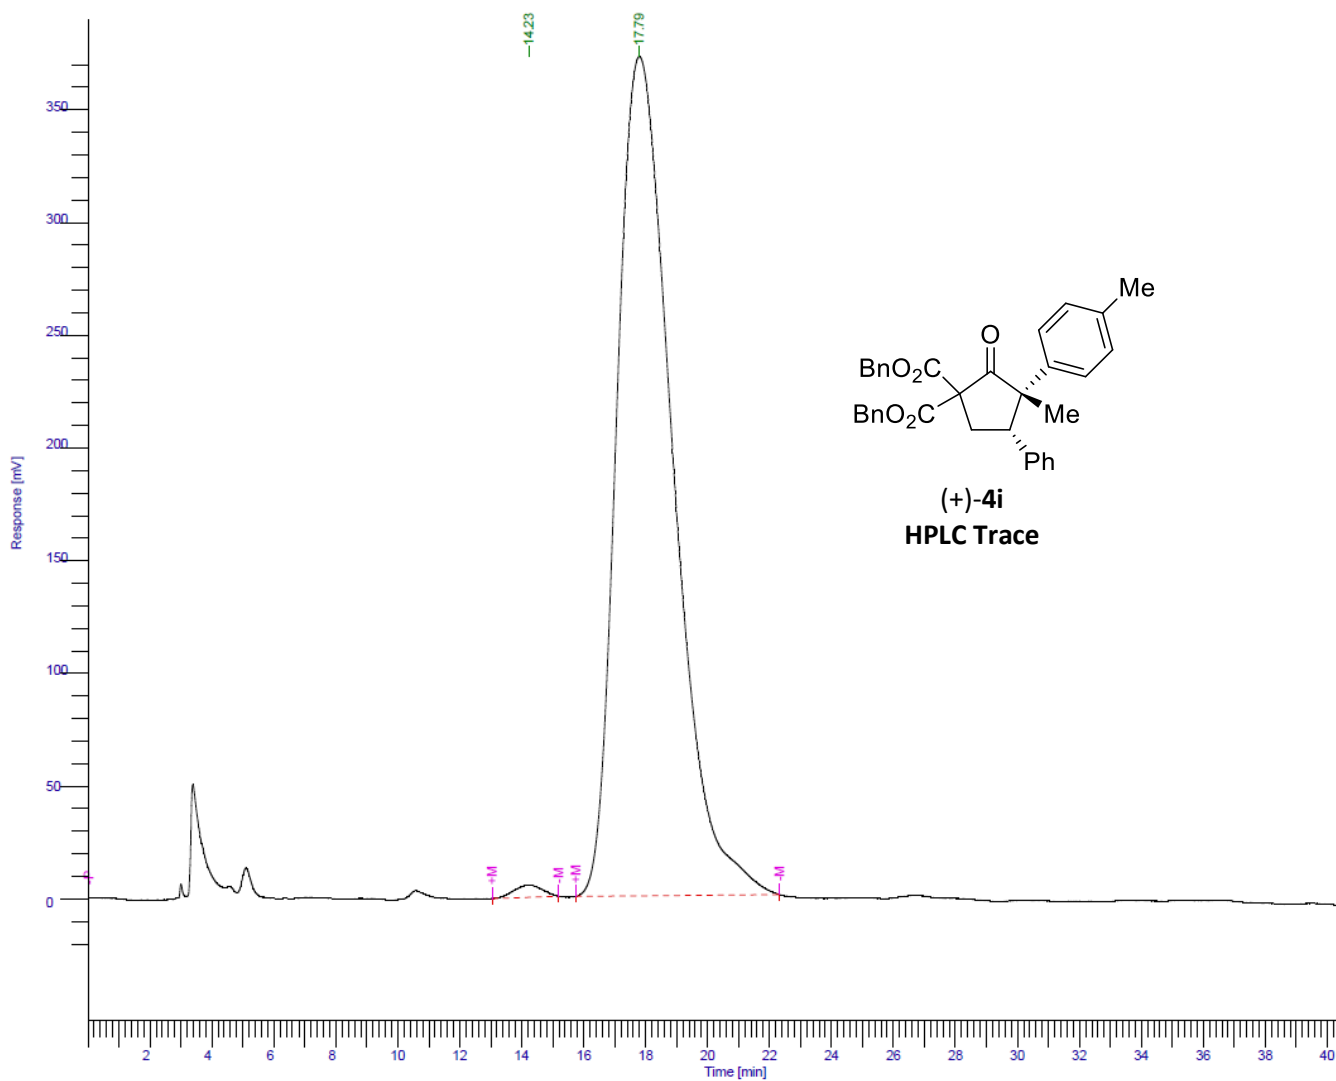

| Peak # | Time [min] | Area [ $\mu\text{V}\cdot\text{s}$ ] | Height [ $\mu\text{V}$ ] | Area [%] | Norm. Area [%] | BL  | Area/Height [s] |
|--------|------------|-------------------------------------|--------------------------|----------|----------------|-----|-----------------|
| 1      | 14.227     | 344968.72                           | 5443.82                  | 0.74     | 0.74           | *BB | 63.3688         |
| 2      | 17.793     | 46464412.31                         | 372354.64                | 99.26    | 99.26          | *BB | 124.7854        |
|        |            | 46809381.03                         | 377798.46                | 100.00   | 100.00         |     |                 |

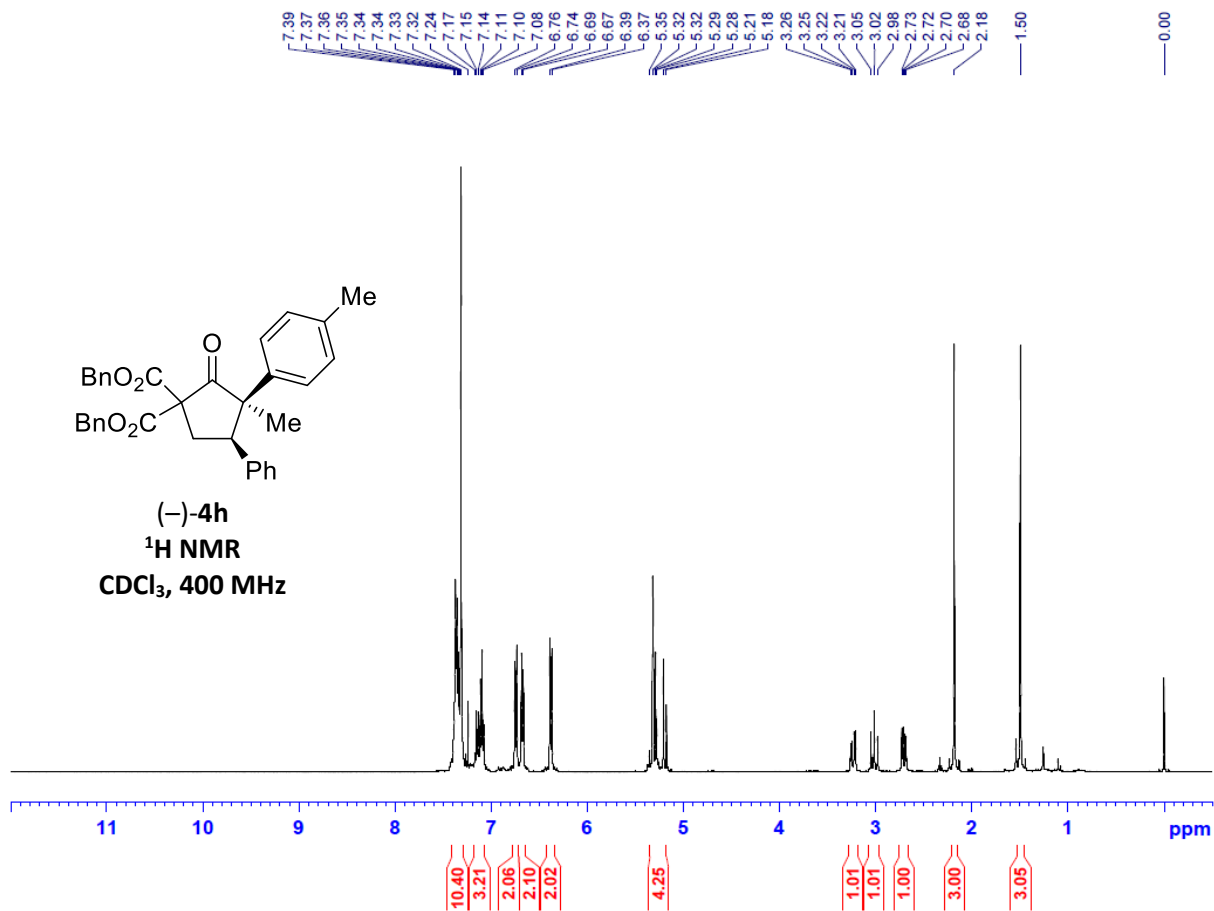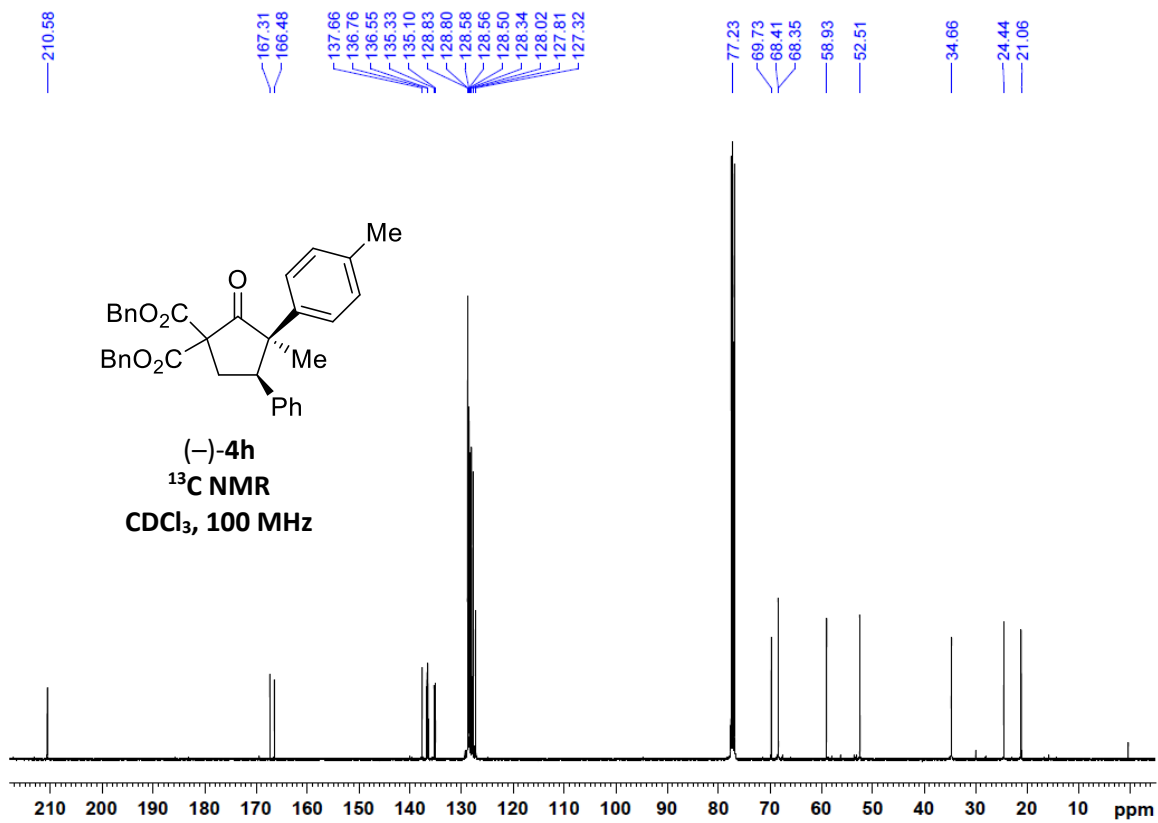

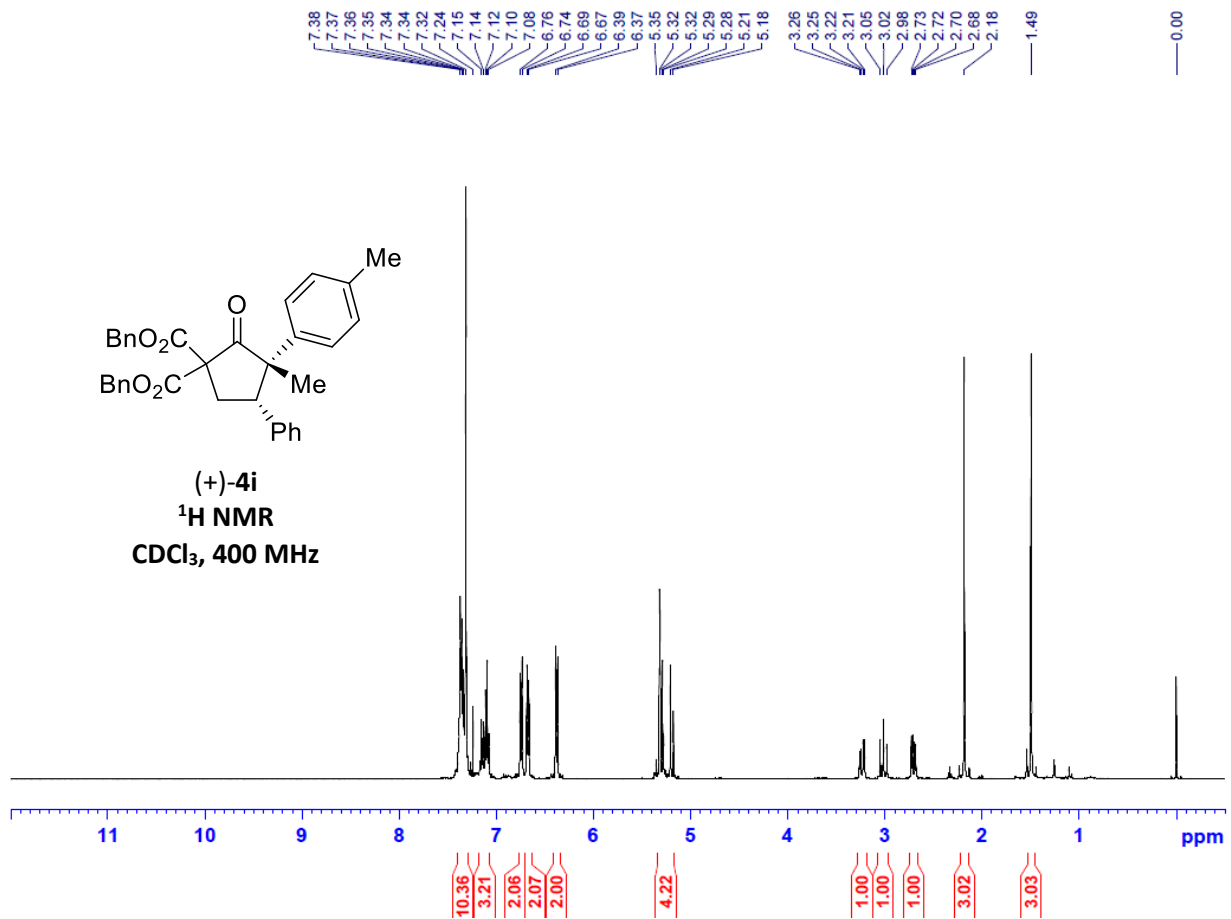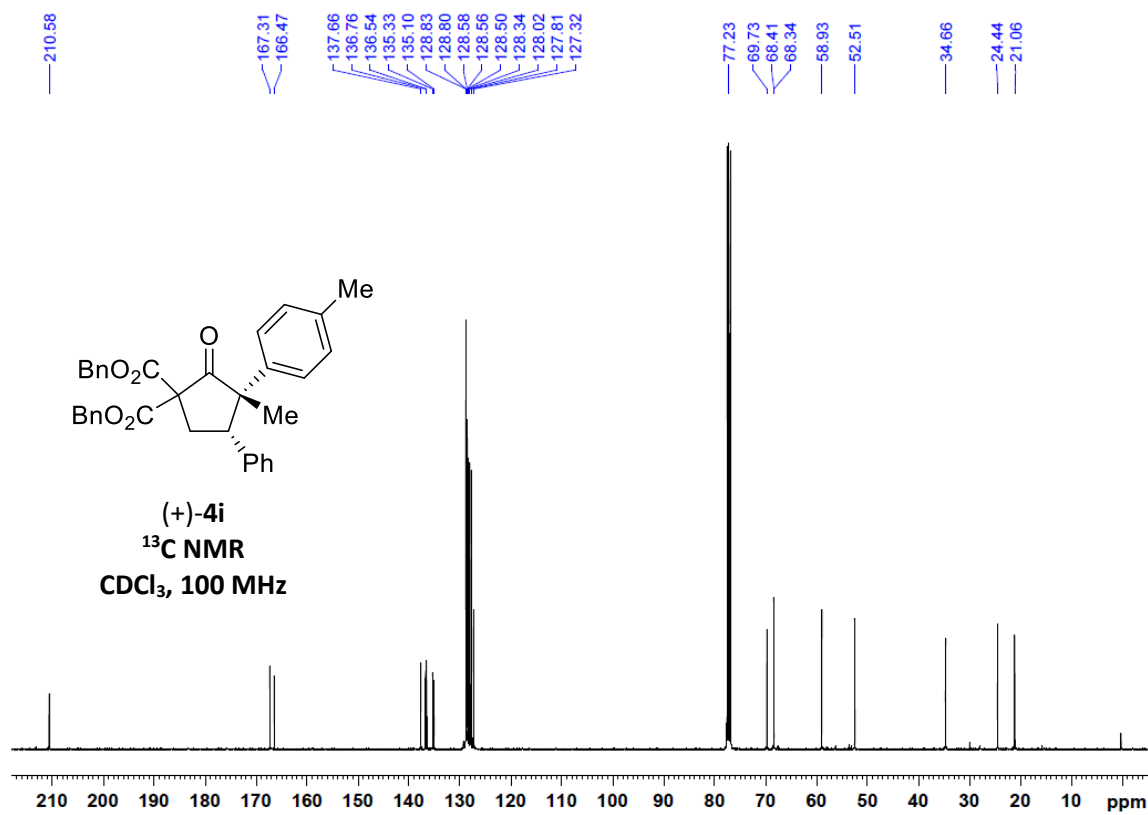

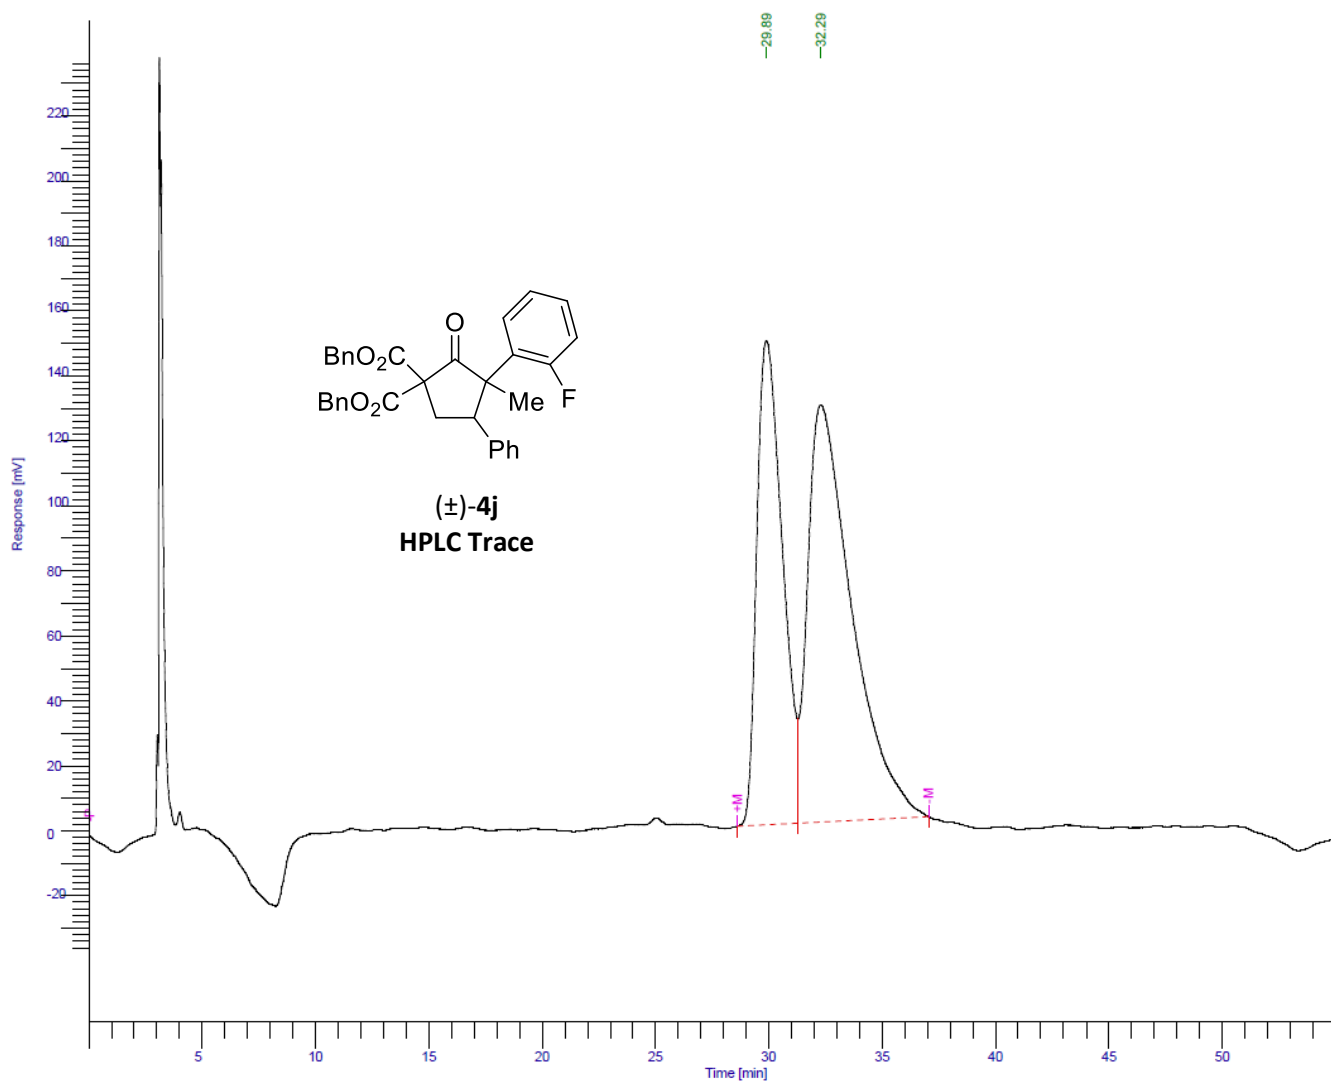

| Peak # | Time [min] | Area [ $\mu\text{V}\cdot\text{s}$ ] | Height [ $\mu\text{V}$ ] | Area [%] | Norm. Area [%] | BL  | Area/Height [s] |
|--------|------------|-------------------------------------|--------------------------|----------|----------------|-----|-----------------|
| 1      | 29.890     | 11673090.11                         | 148973.42                | 40.12    | 40.12          | *BV | 78.3569         |
| 2      | 32.295     | 17421798.46                         | 128398.24                | 59.88    | 59.88          | *VB | 135.6856        |
|        |            | 29094888.57                         | 277371.66                | 100.00   | 100.00         |     |                 |

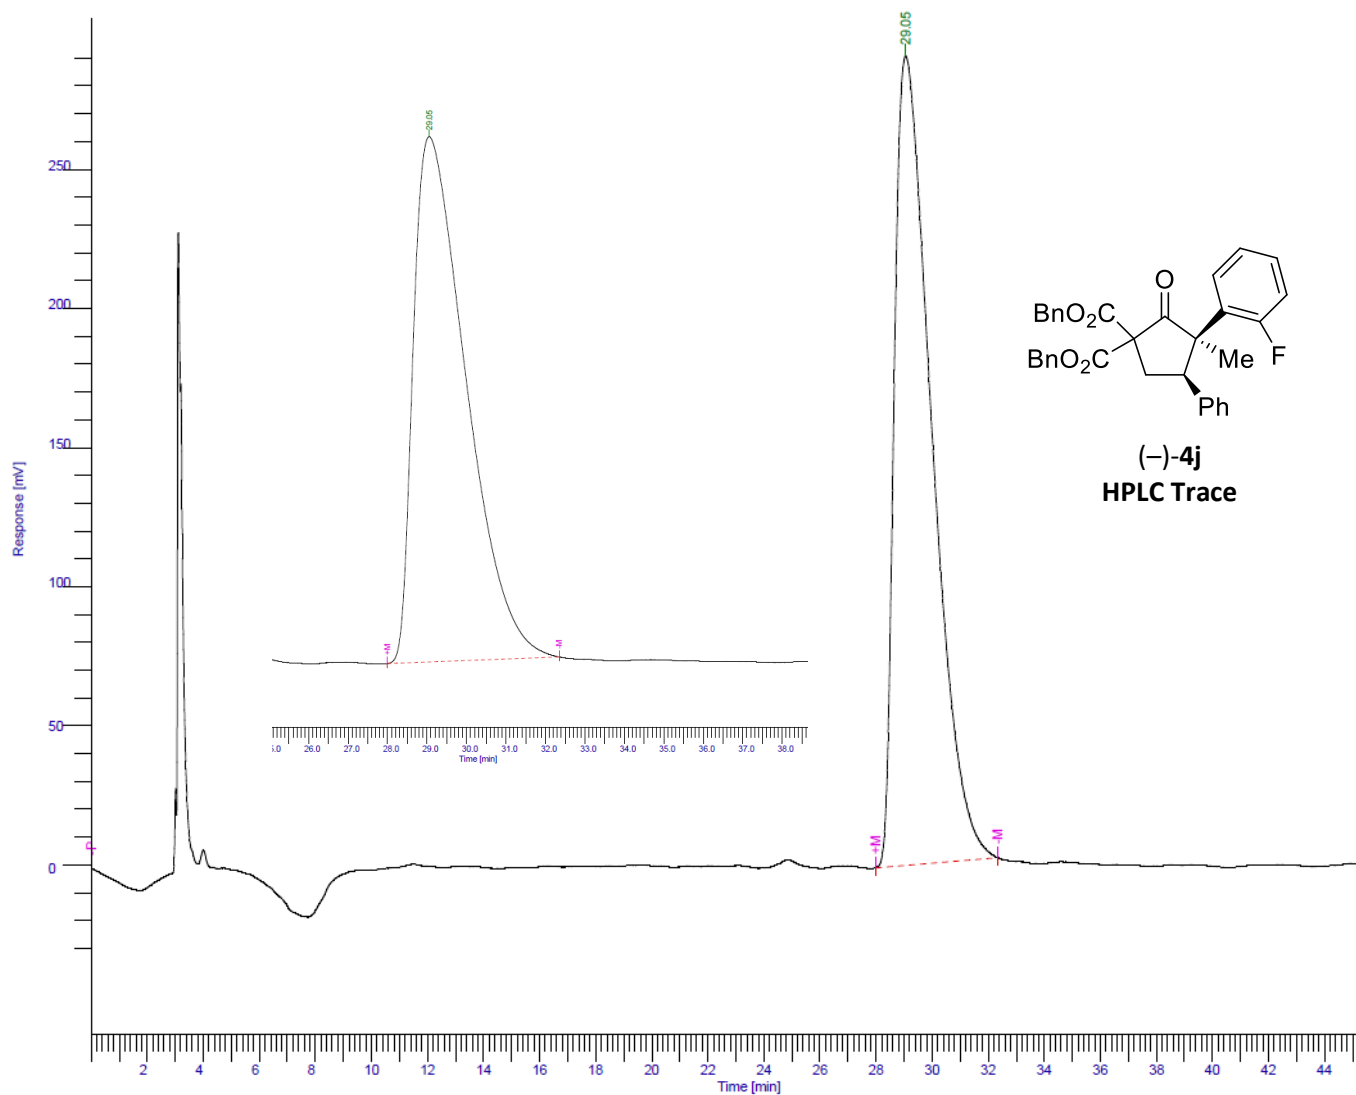

| Peak # | Time [min] | Area [ $\mu\text{V}\cdot\text{s}$ ] | Height [ $\mu\text{V}$ ] | Area [%] | Norm. Area [%] | BL  | Area/Height [s] |
|--------|------------|-------------------------------------|--------------------------|----------|----------------|-----|-----------------|
| 1      | 29.053     | 26967187.47                         | 290943.86                | 100.00   | 100.00         | *BB | 92.6886         |
|        |            | 26967187.47                         | 290943.86                | 100.00   | 100.00         |     |                 |

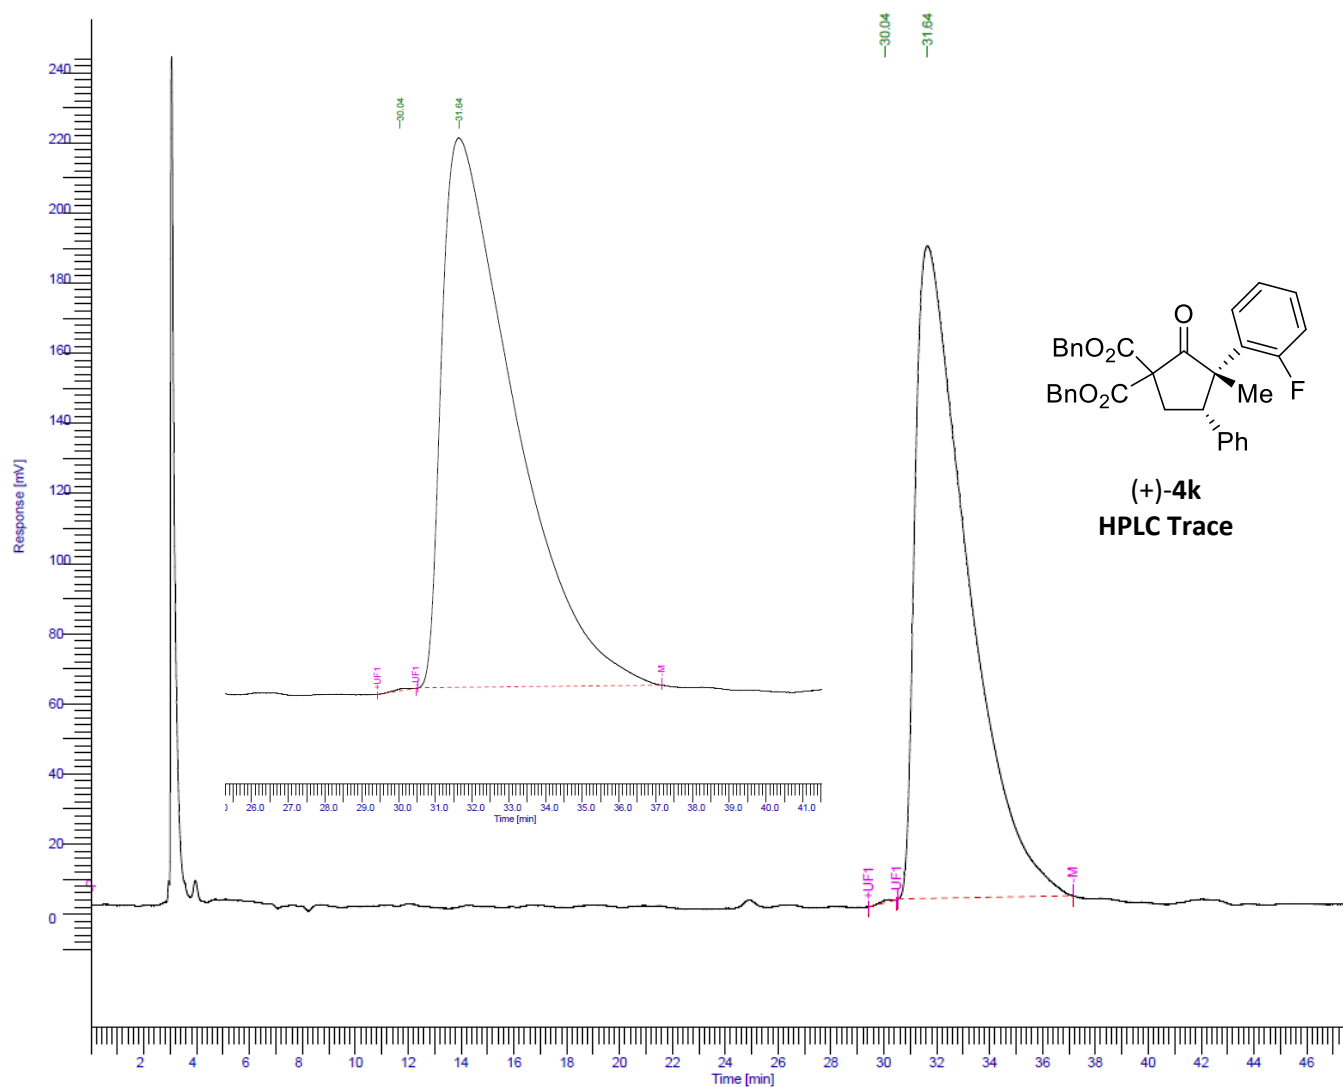

| Peak # | Time [min] | Area [ $\mu\text{V}\cdot\text{s}$ ] | Height [ $\mu\text{V}$ ] | Area [%] | Norm. Area [%] | BL  | Area/Height [s] |
|--------|------------|-------------------------------------|--------------------------|----------|----------------|-----|-----------------|
| 1      | 30.045     | 18578.76                            | 669.54                   | 0.07     | 0.07           | *MM | 27.7487         |
| 2      | 31.641     | 25469099.85                         | 186192.75                | 99.93    | 99.93          | *BB | 136.7889        |
|        |            | 25487678.61                         | 186862.29                | 100.00   | 100.00         |     |                 |

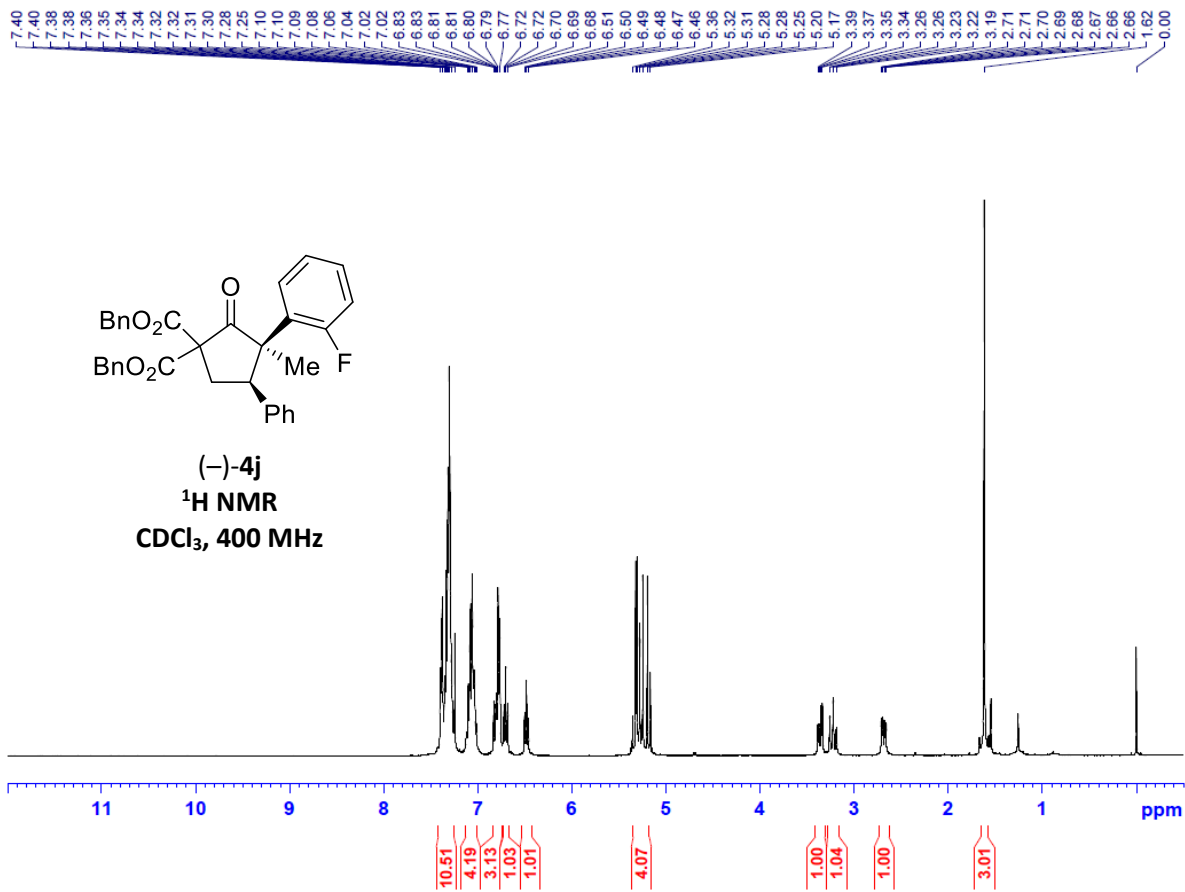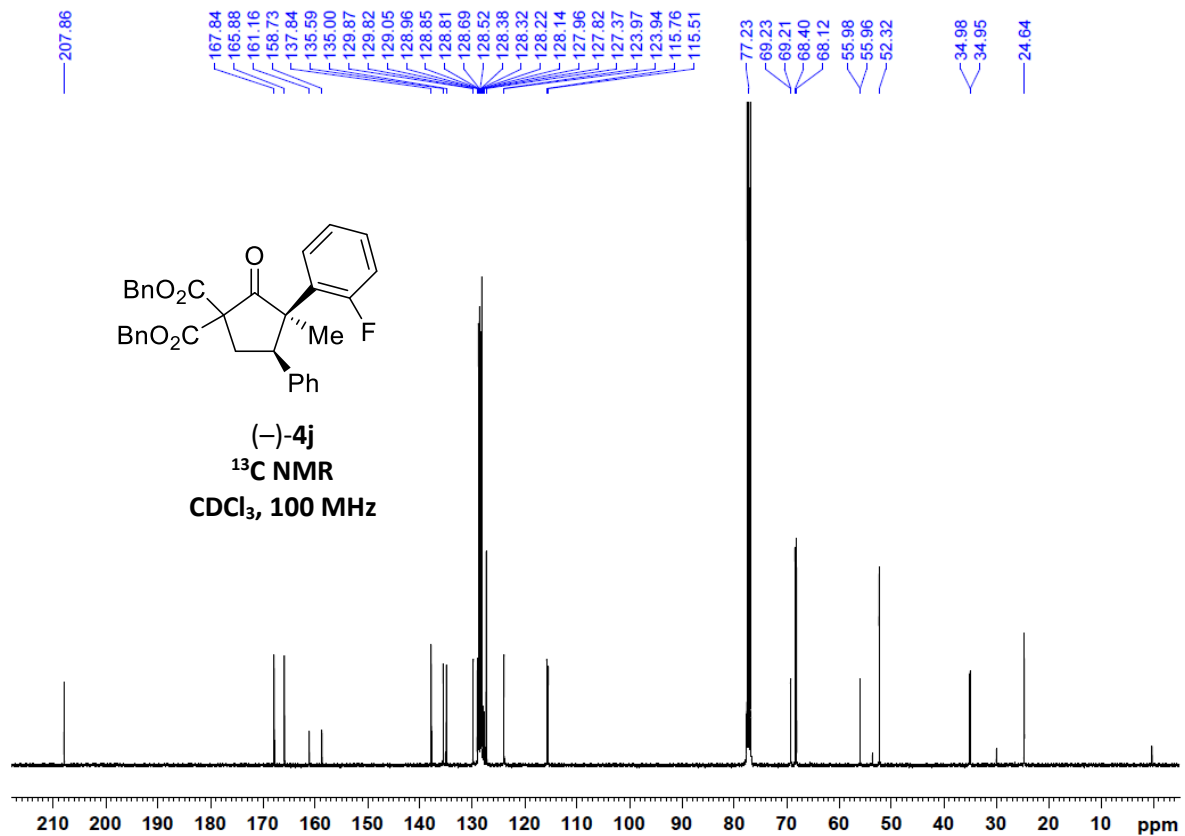



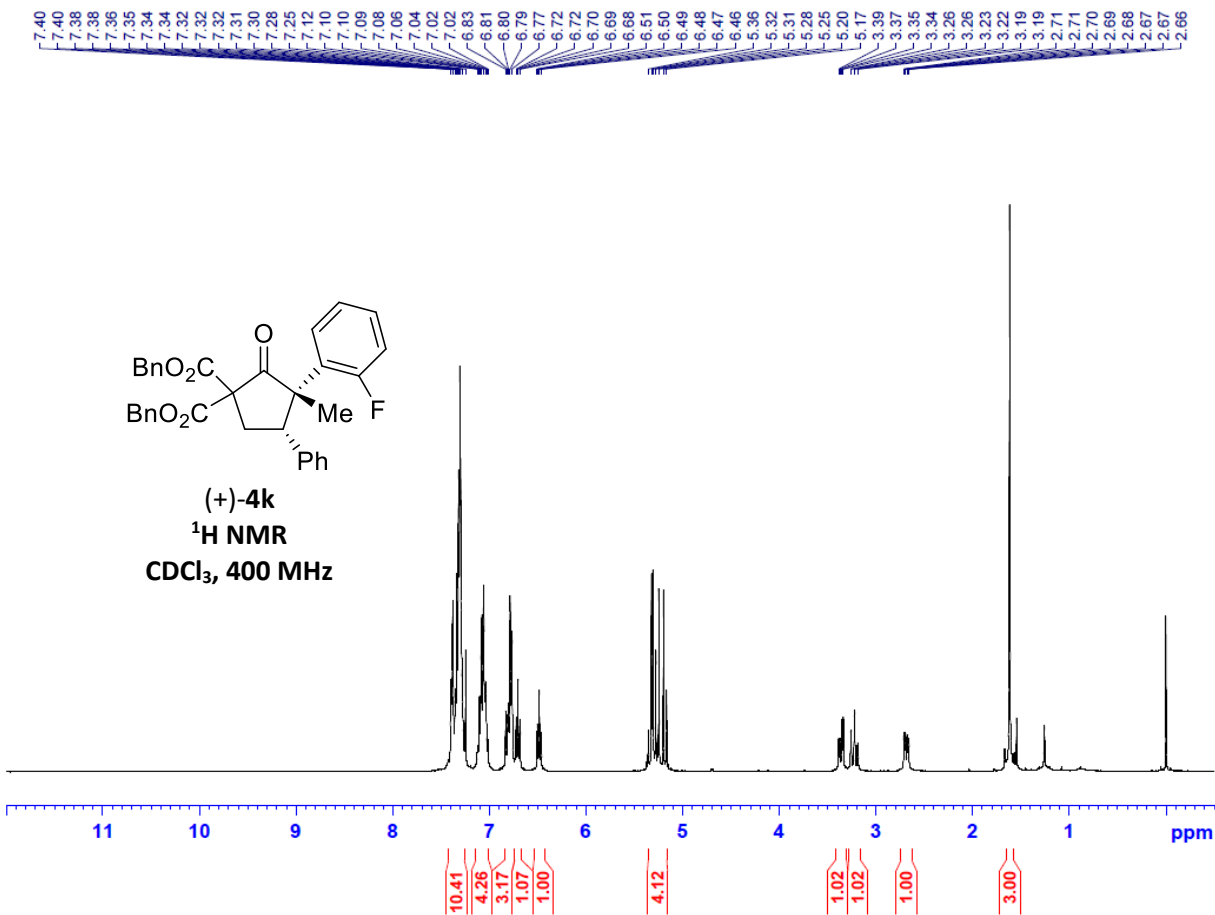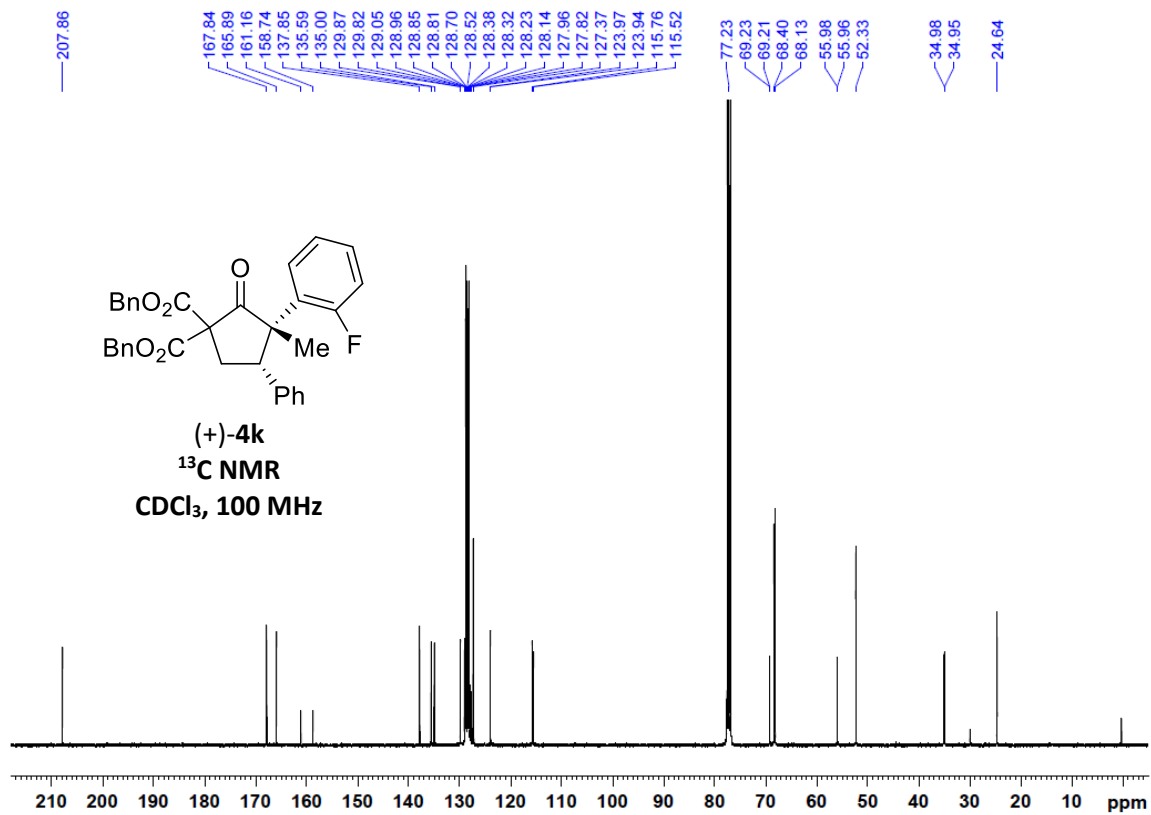

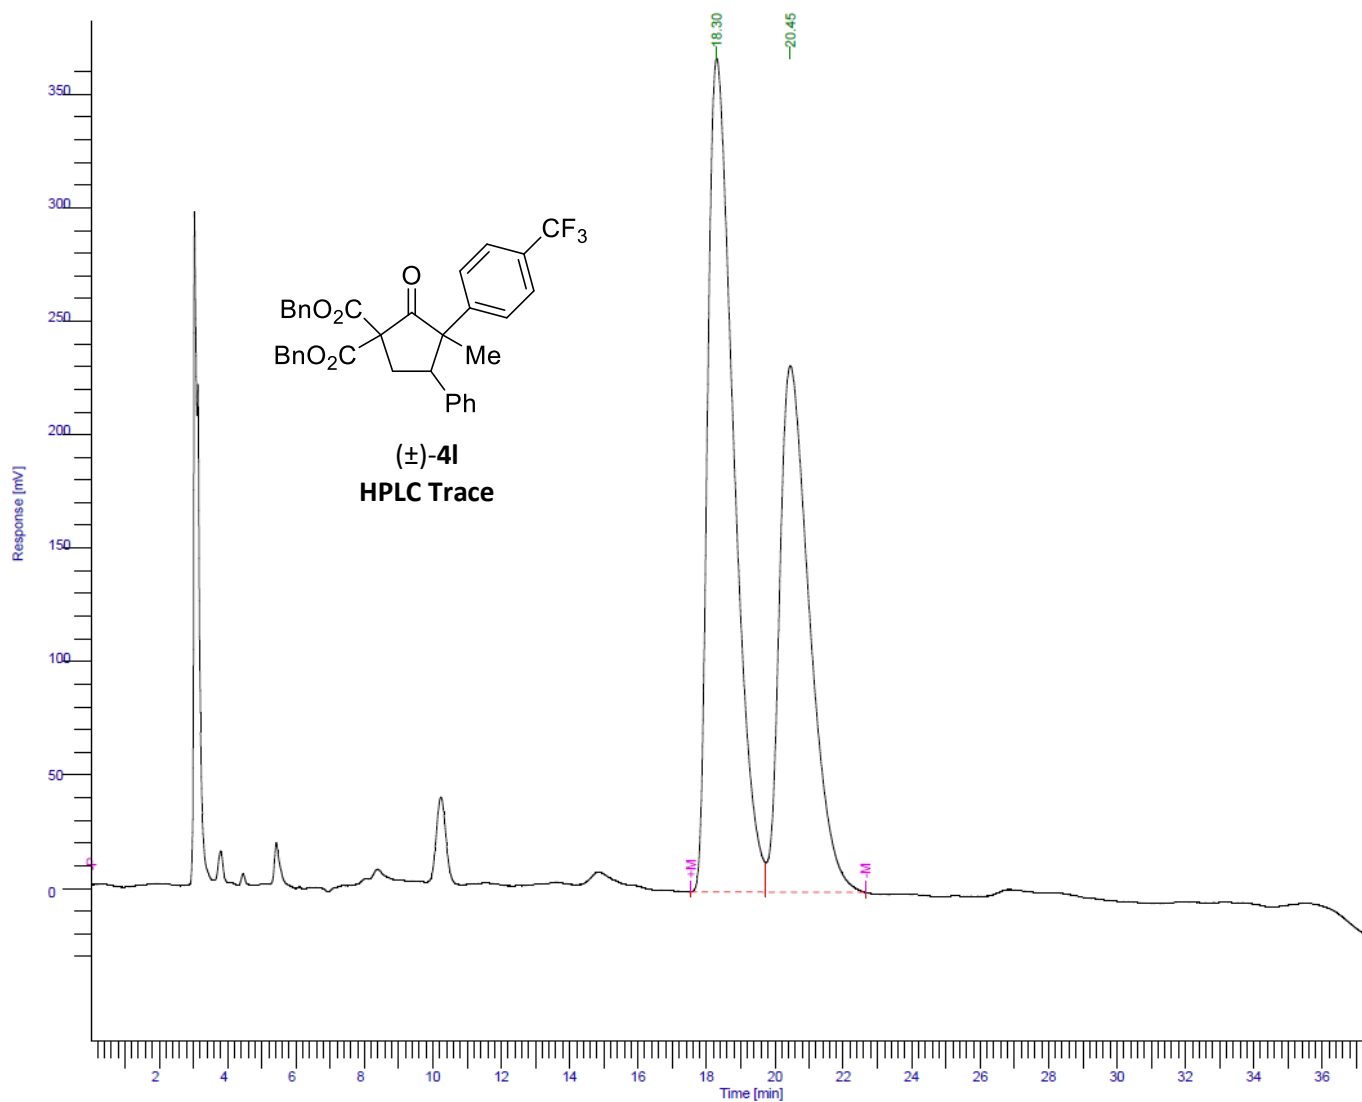

| Peak # | Time [min] | Area [ $\mu\text{V}\cdot\text{s}$ ] | Height [ $\mu\text{V}$ ] | Area [%] | Norm. Area [%] | BL  | Area/Height [s] |
|--------|------------|-------------------------------------|--------------------------|----------|----------------|-----|-----------------|
| 1      | 18.300     | 19462830.75                         | 367425.03                | 57.97    | 57.97          | *BV | 52.9709         |
| 2      | 20.453     | 14110257.46                         | 232062.66                | 42.03    | 42.03          | *VB | 60.8037         |
|        |            | 33573088.21                         | 599487.69                | 100.00   | 100.00         |     |                 |

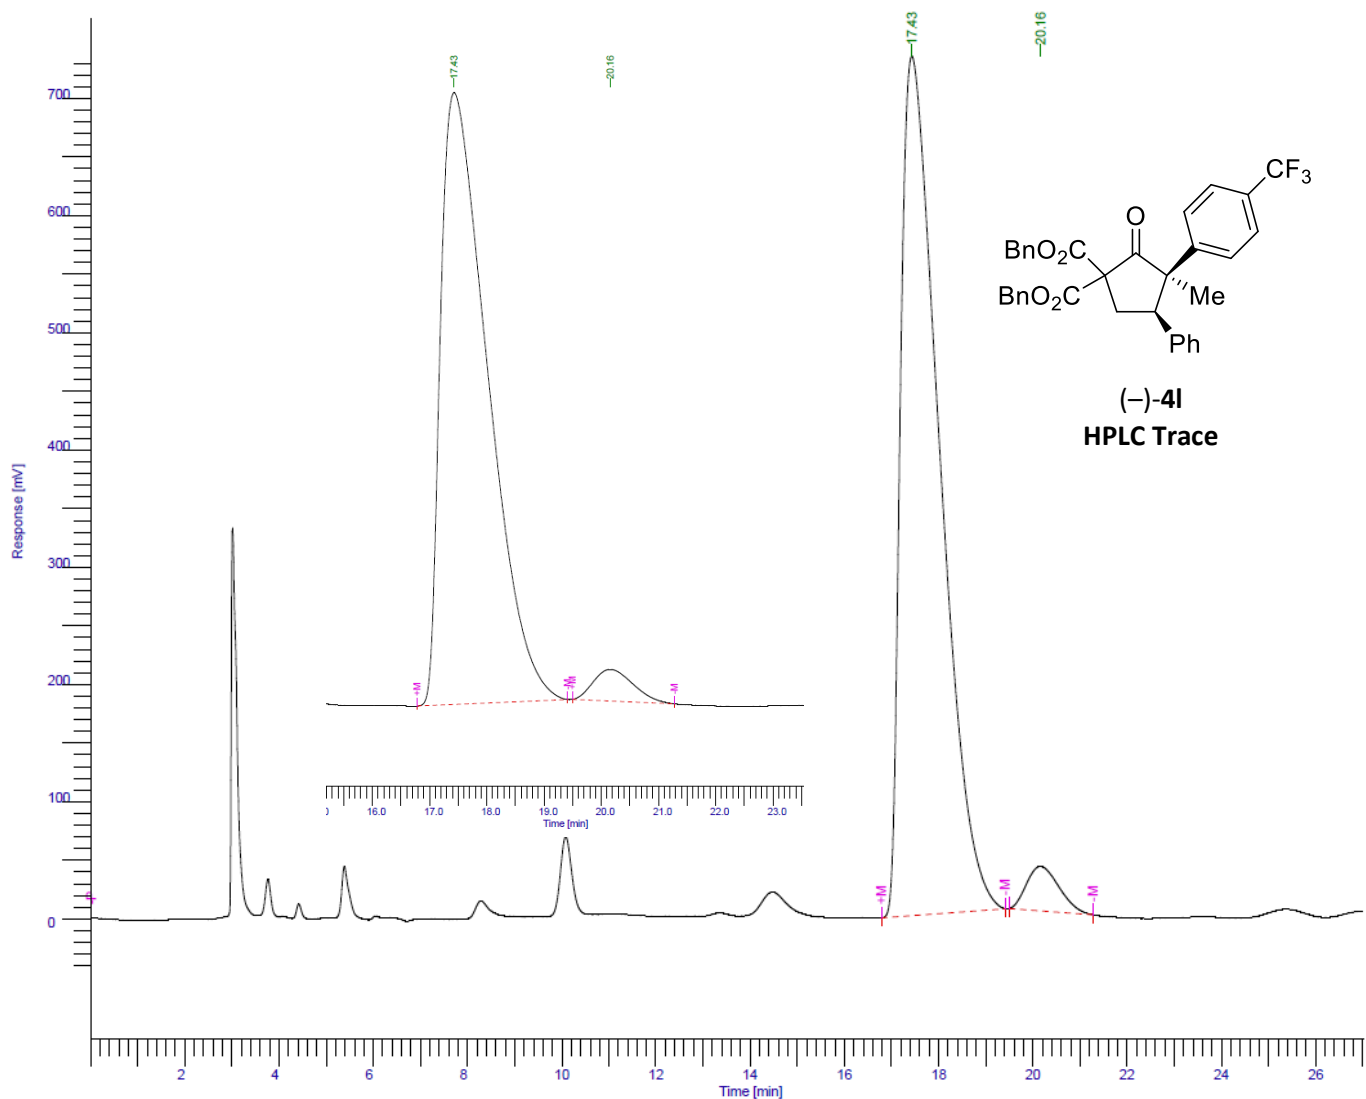

| Peak # | Time [min] | Area [ $\mu\text{V}\cdot\text{s}$ ] | Height [ $\mu\text{V}$ ] | Area [%] | Norm. Area [%] | BL  | Area/Height [s] |
|--------|------------|-------------------------------------|--------------------------|----------|----------------|-----|-----------------|
| 1      | 17.429     | 41966998.33                         | 733367.94                | 95.82    | 95.82          | *BB | 57.2250         |
| 2      | 20.162     | 1828747.66                          | 37953.04                 | 4.18     | 4.18           | *BB | 48.1845         |
|        |            | 43795745.99                         | 771320.98                | 100.00   | 100.00         |     |                 |

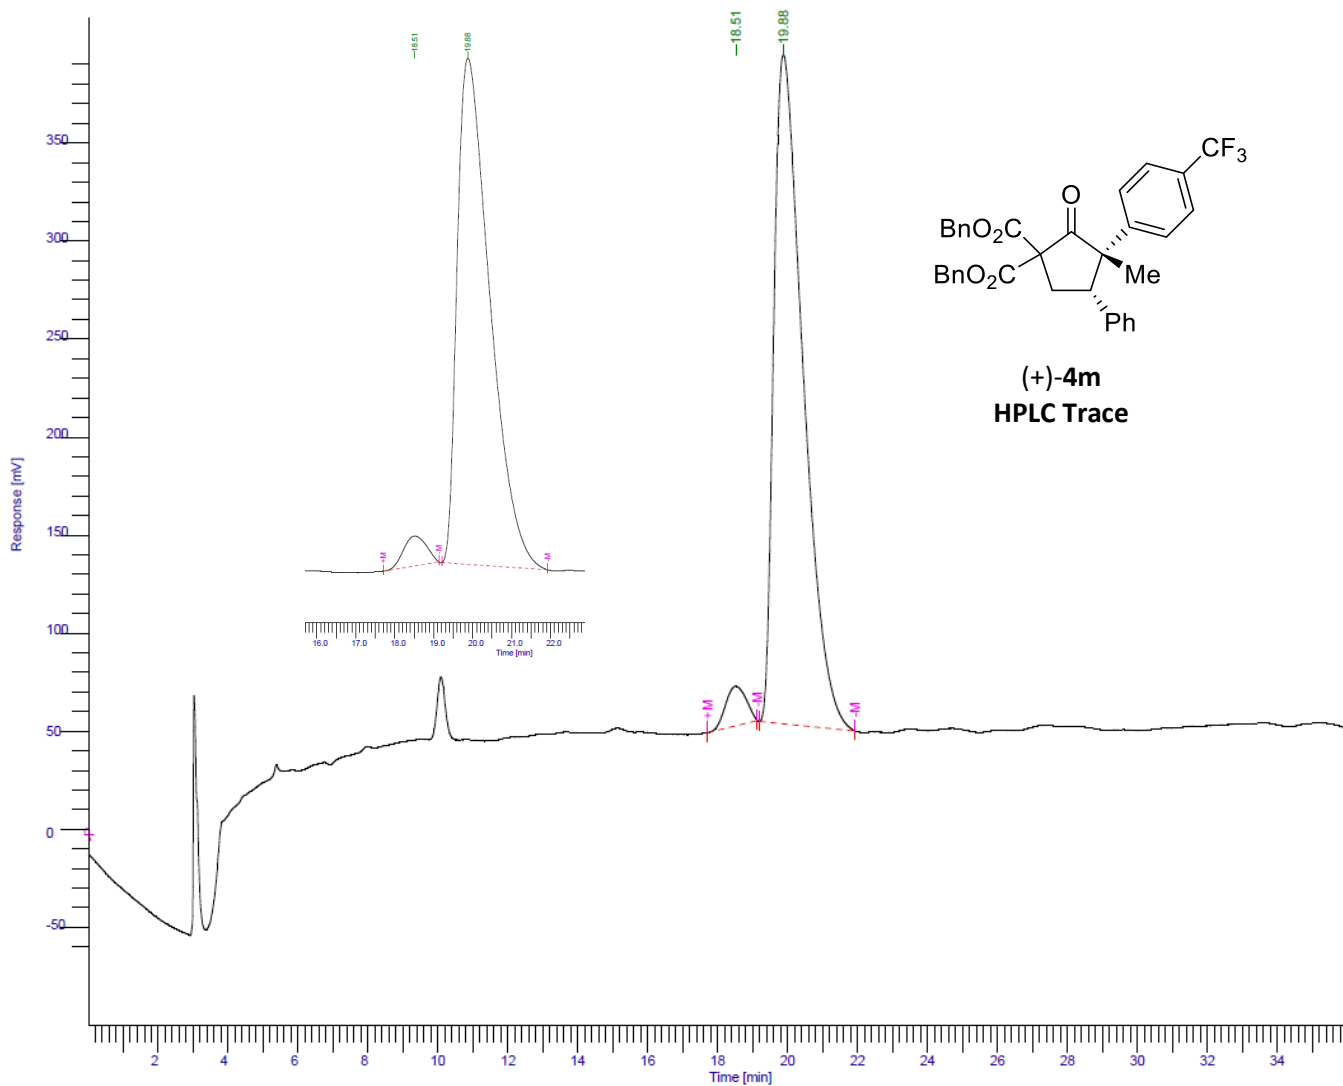

| Peak # | Time [min] | Area [μV·s] | Height [μV] | Area [%] | Norm. Area [%] | BL  | Area/Height [s] |
|--------|------------|-------------|-------------|----------|----------------|-----|-----------------|
| 1      | 18.513     | 823021.21   | 20160.83    | 3.97     | 3.97           | *BB | 40.8228         |
| 2      | 19.878     | 19902007.63 | 341104.01   | 96.03    | 96.03          | *BB | 58.3459         |
|        |            | 20725028.83 | 361264.84   | 100.00   | 100.00         |     |                 |

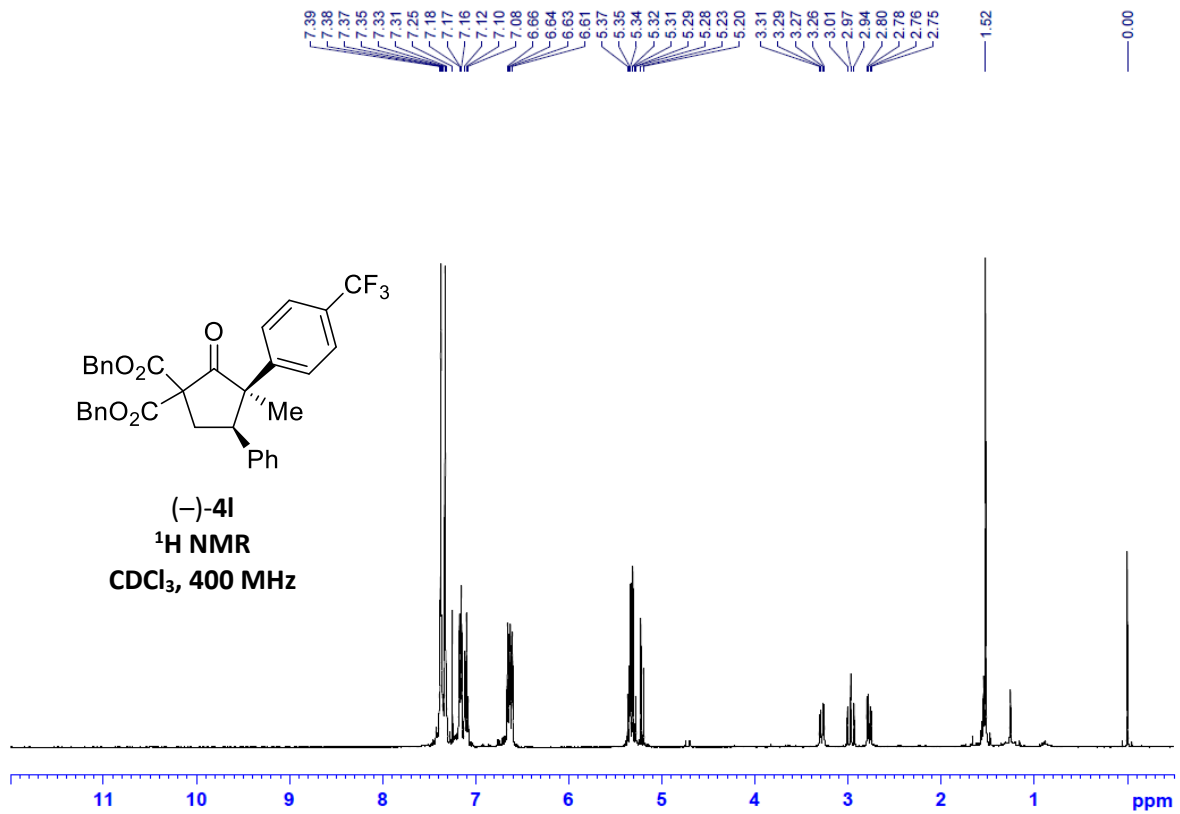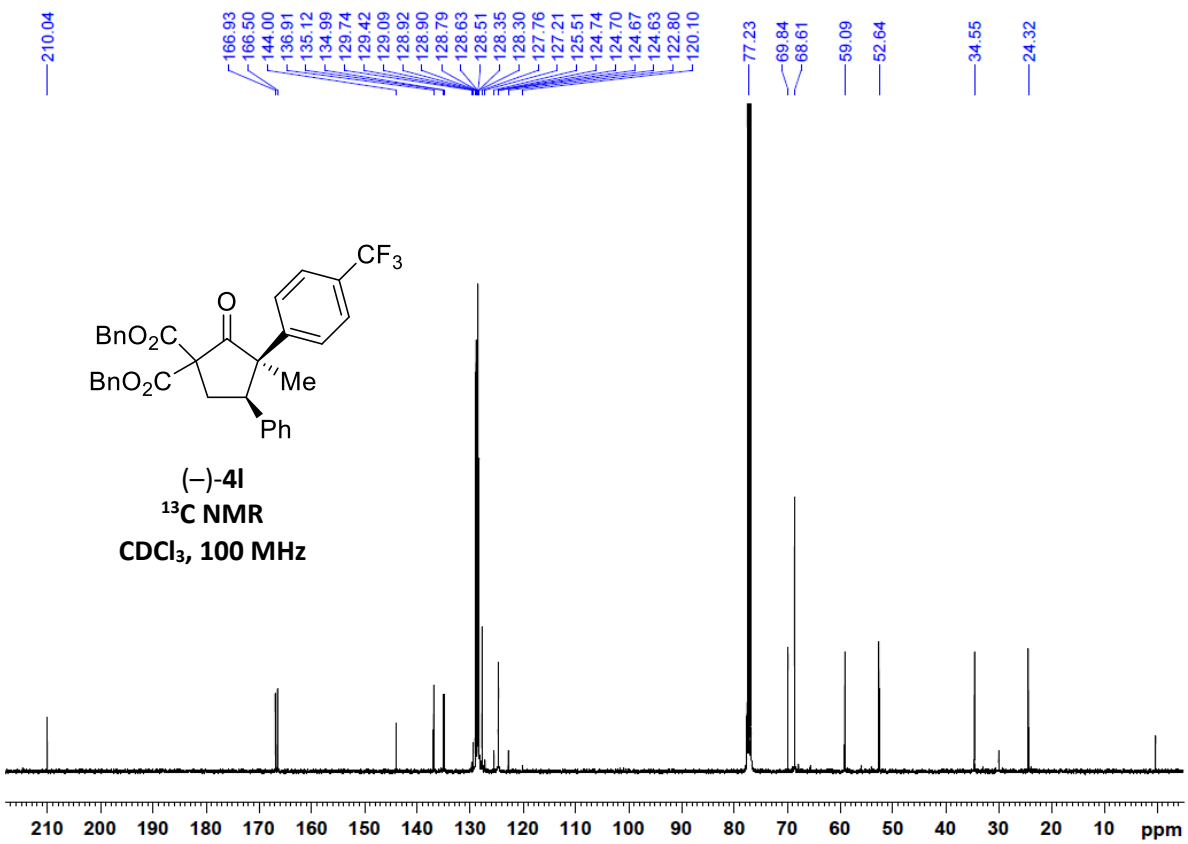

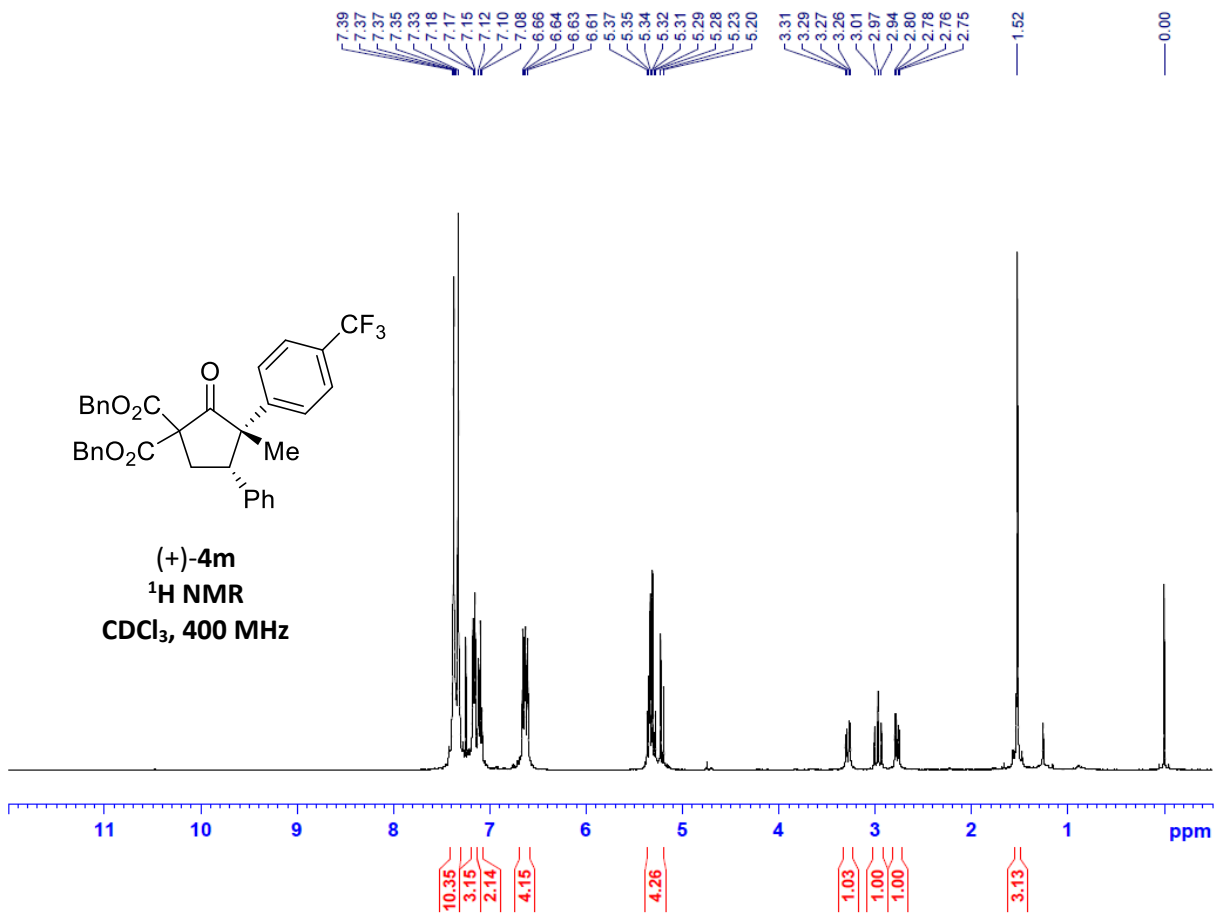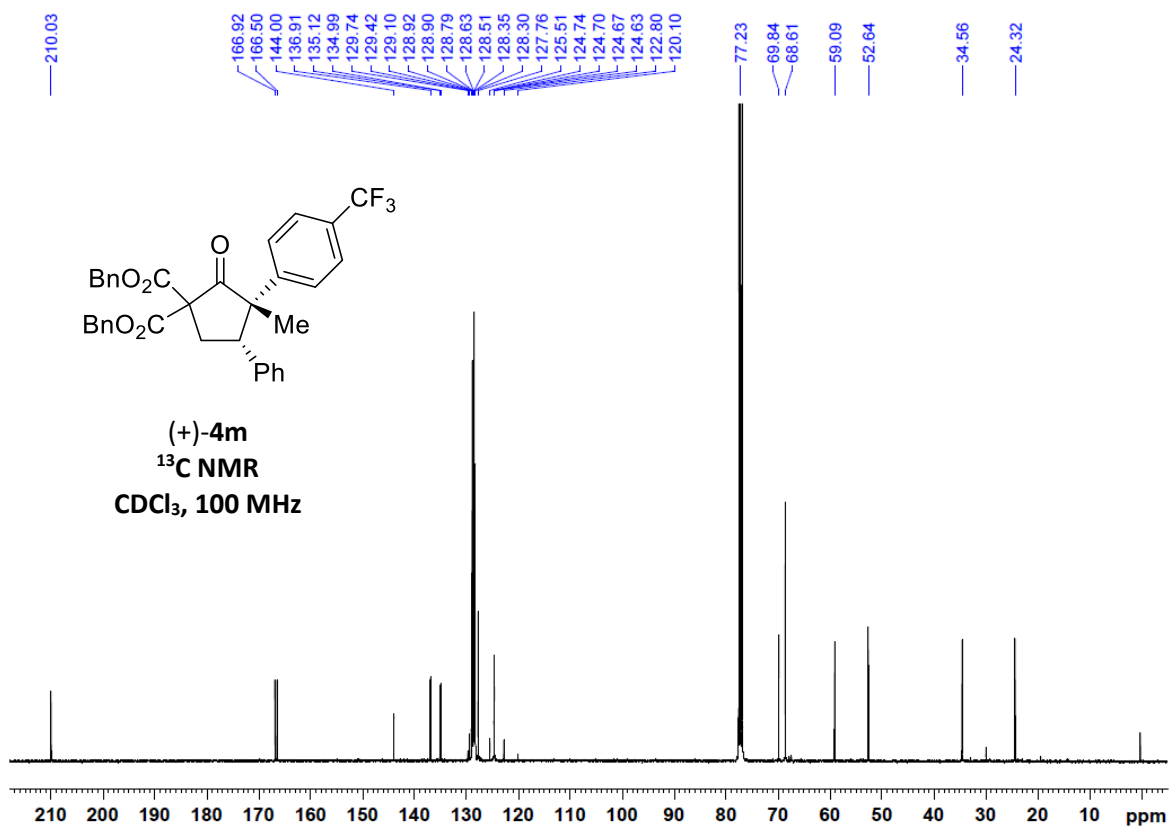

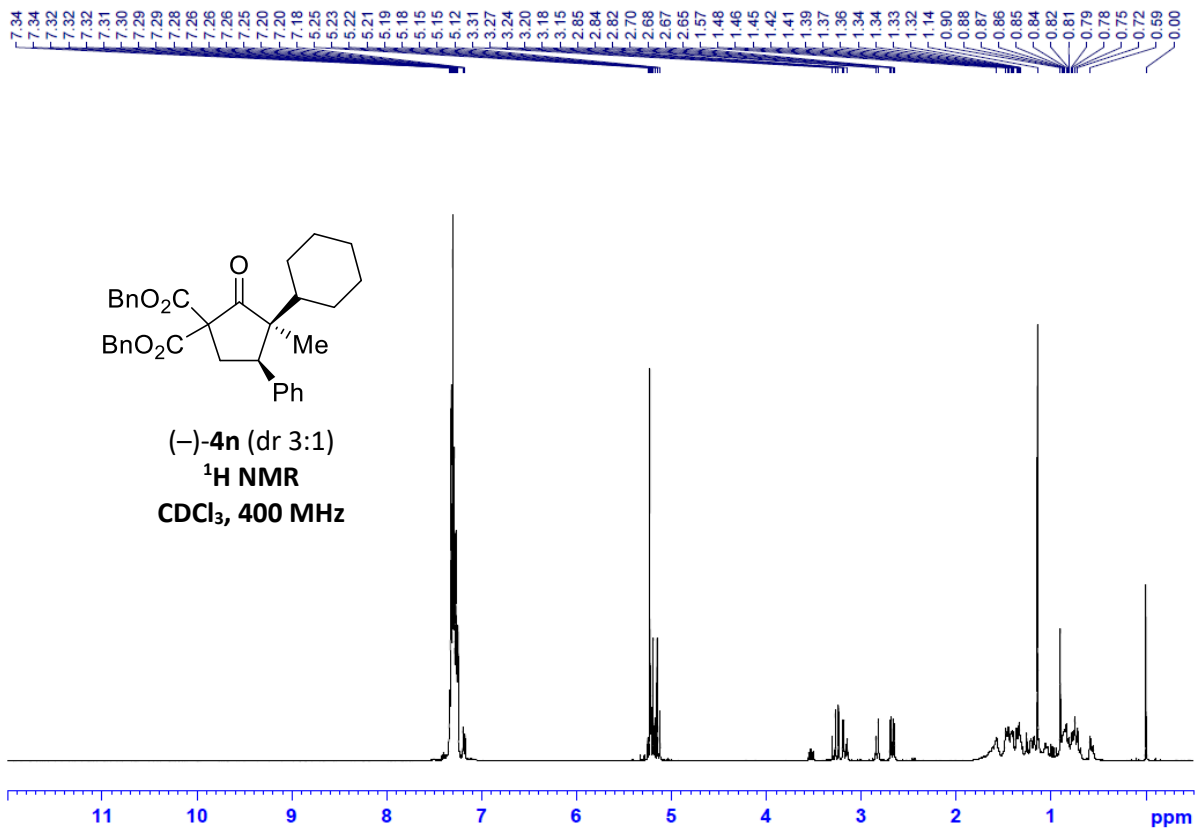

209.19

167.57  
166.52

138.40  
135.33  
135.20  
129.72  
128.77  
128.73  
128.68  
128.59  
128.52  
128.40  
128.26  
127.49

77.23  
68.19  
68.14  
57.08  
50.83  
40.15  
33.74  
29.44  
28.55  
27.04  
26.19  
20.69

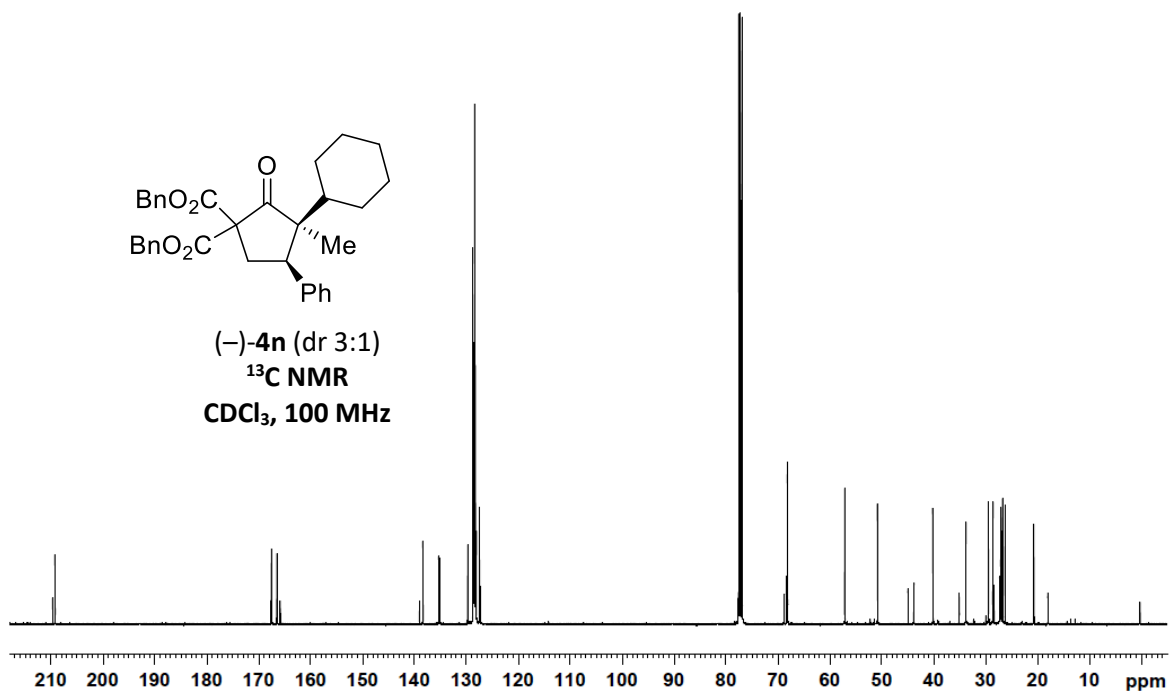

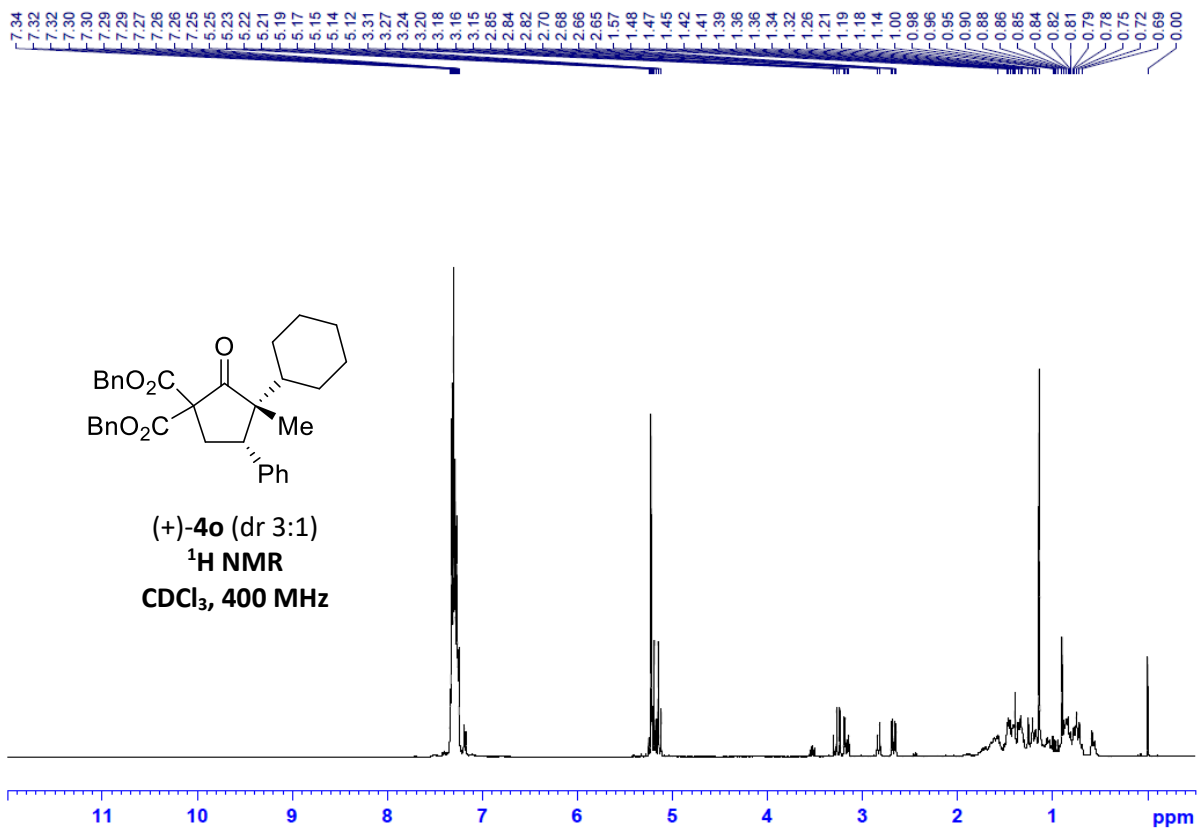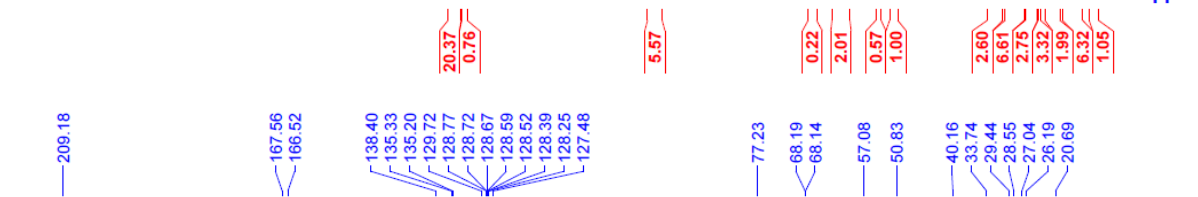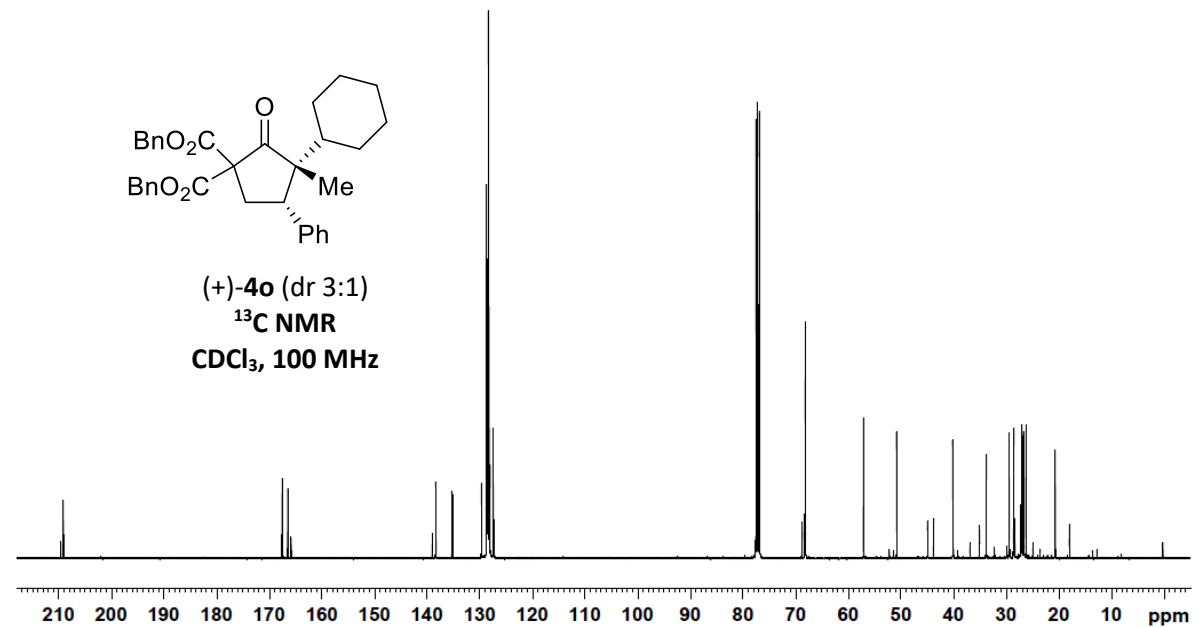



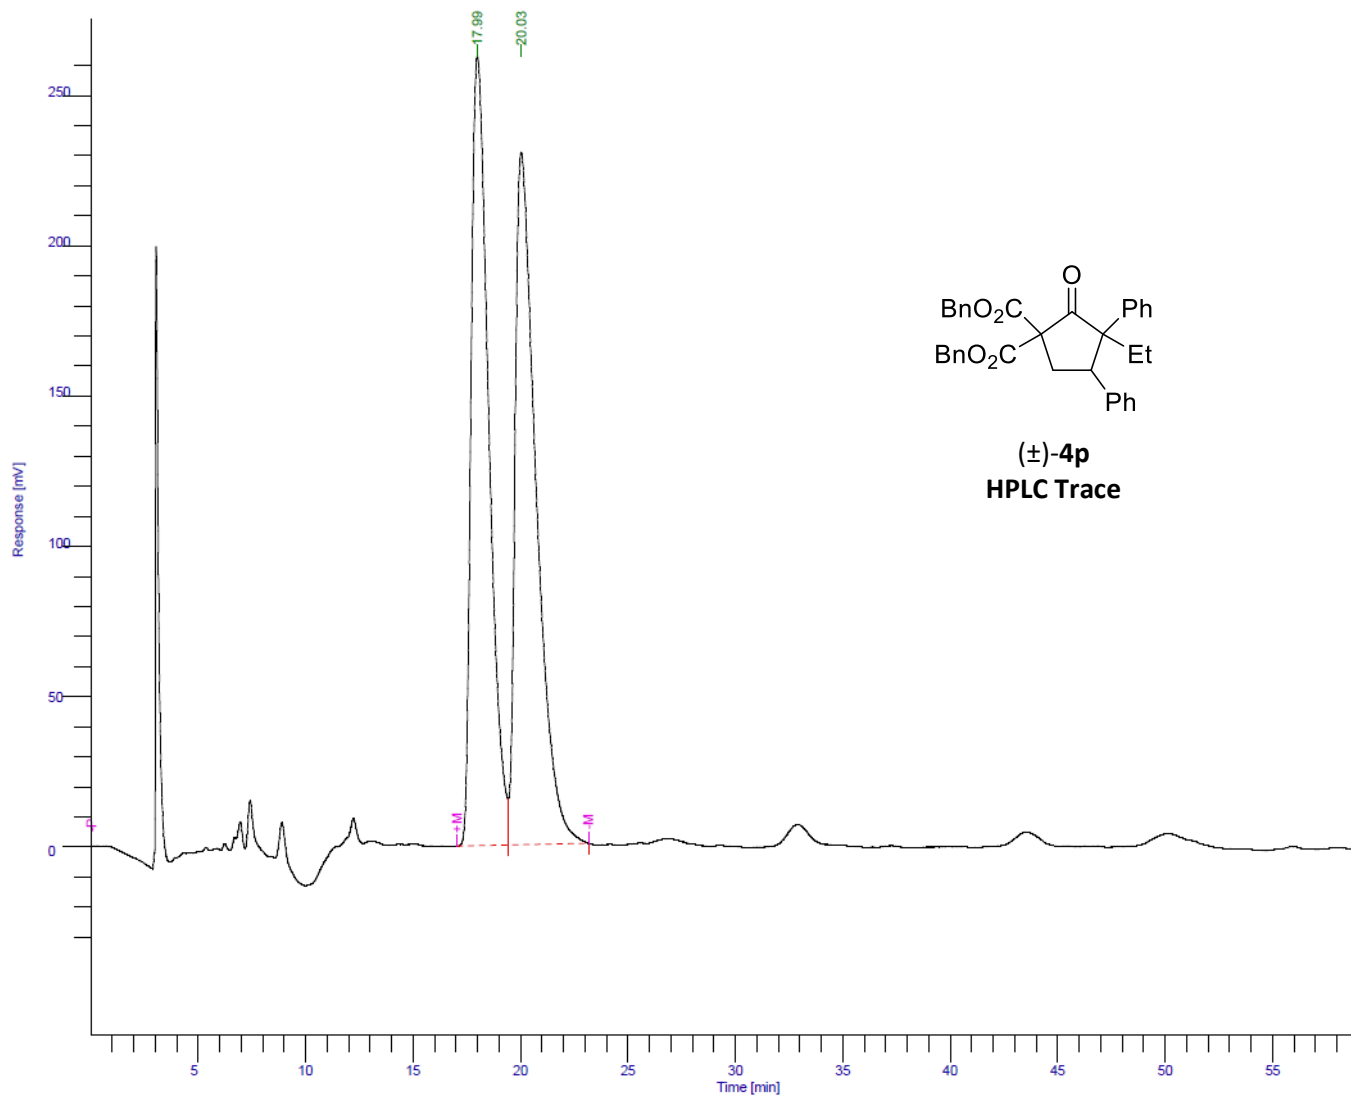

| Peak # | Time [min] | Area [ $\mu\text{V}\cdot\text{s}$ ] | Height [ $\mu\text{V}$ ] | Area [%] | Norm. Area [%] | BL  | Area/Height [s] |
|--------|------------|-------------------------------------|--------------------------|----------|----------------|-----|-----------------|
| 1      | 17.994     | 15085492.58                         | 262558.31                | 48.94    | 48.94          | *BV | 57.4558         |
| 2      | 20.032     | 15741271.05                         | 230413.11                | 51.06    | 51.06          | *VB | 68.3176         |
|        |            | 30826763.62                         | 492971.42                | 100.00   | 100.00         |     |                 |

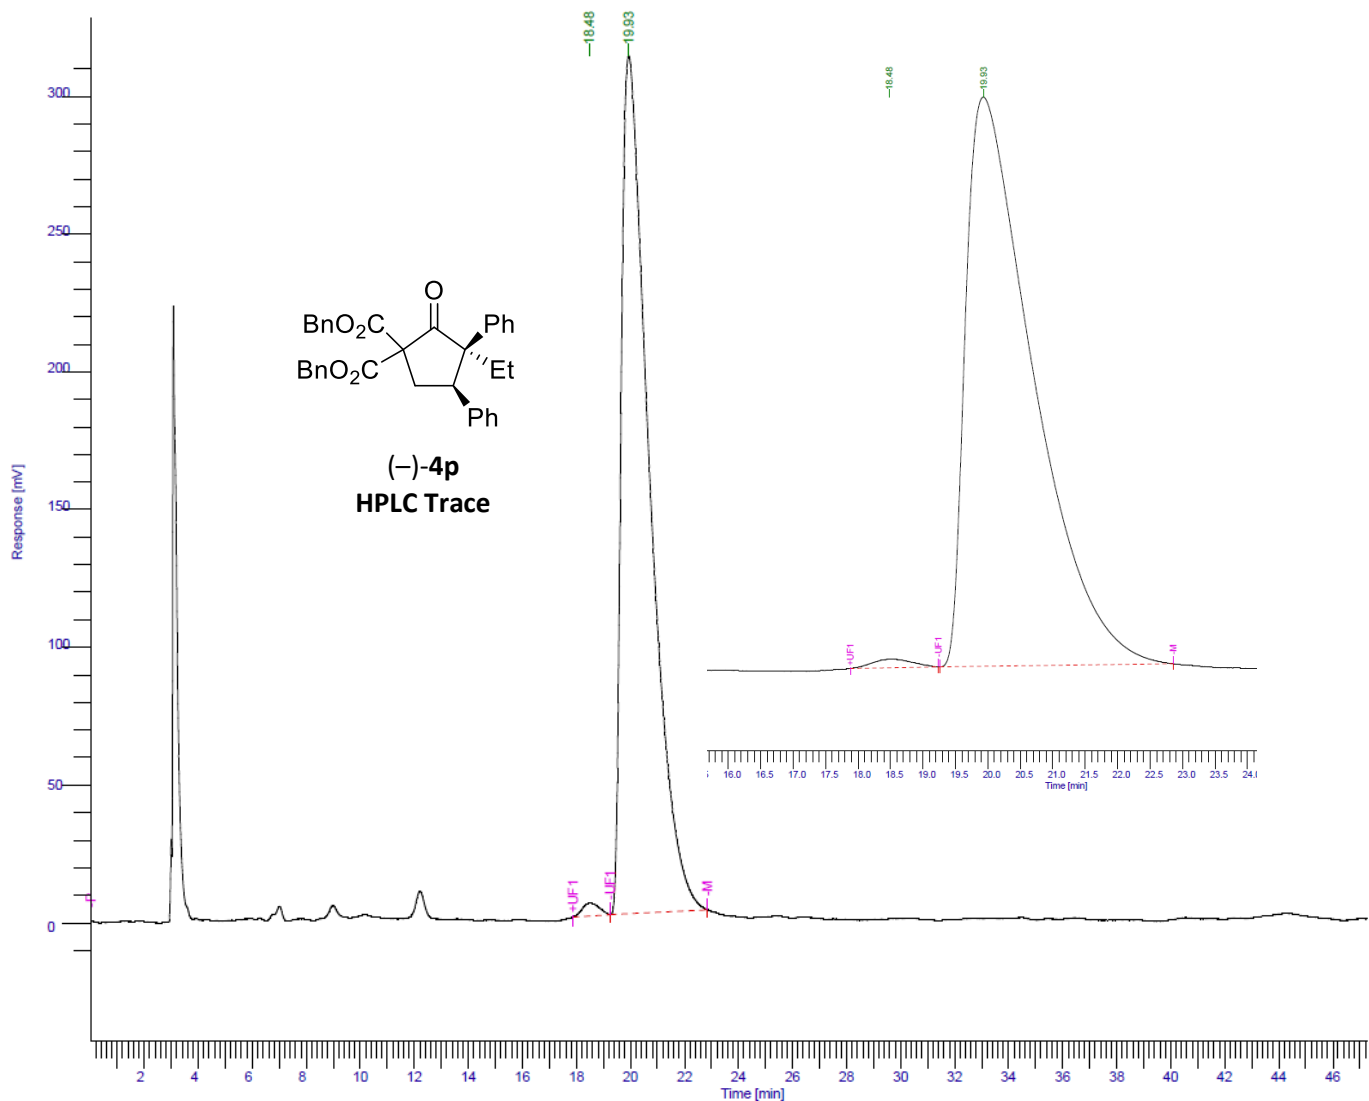

| Peak # | Time [min] | Area [ $\mu\text{V}\cdot\text{s}$ ] | Height [ $\mu\text{V}$ ] | Area [%] | Norm. Area [%] | BL  | Area/Height [s] |
|--------|------------|-------------------------------------|--------------------------|----------|----------------|-----|-----------------|
| 1      | 18.480     | 201989.73                           | 4727.87                  | 0.89     | 0.89           | *MM | 42.7232         |
| 2      | 19.931     | 22469819.16                         | 311458.36                | 99.11    | 99.11          | *BB | 72.1439         |
|        |            | 22671808.89                         | 316186.23                | 100.00   | 100.00         |     |                 |

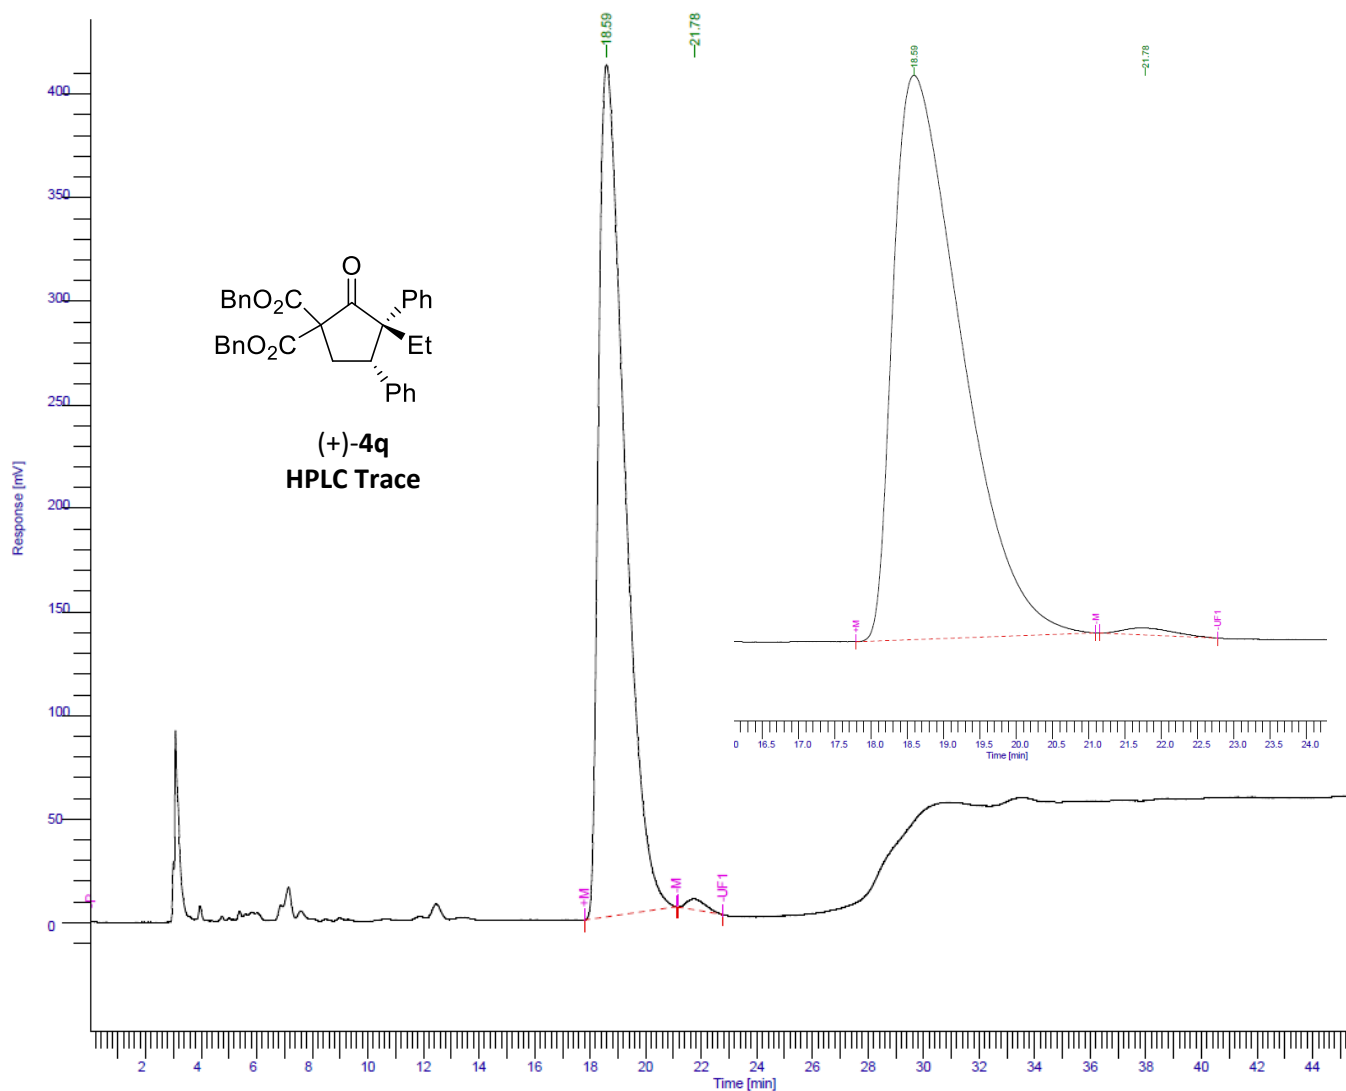

| Peak # | Time [min] | Area [ $\mu\text{V}\cdot\text{s}$ ] | Height [ $\mu\text{V}$ ] | Area [%] | Norm. Area [%] | BL  | Area/Height [s] |
|--------|------------|-------------------------------------|--------------------------|----------|----------------|-----|-----------------|
| 1      | 18.590     | 26822297.81                         | 411237.38                | 99.08    | 99.08          | *BB | 65.2234         |
| 2      | 21.780     | 248278.57                           | 5190.94                  | 0.92     | 0.92           | *MM | 47.8292         |
|        |            | 27070576.38                         | 416428.33                | 100.00   | 100.00         |     |                 |

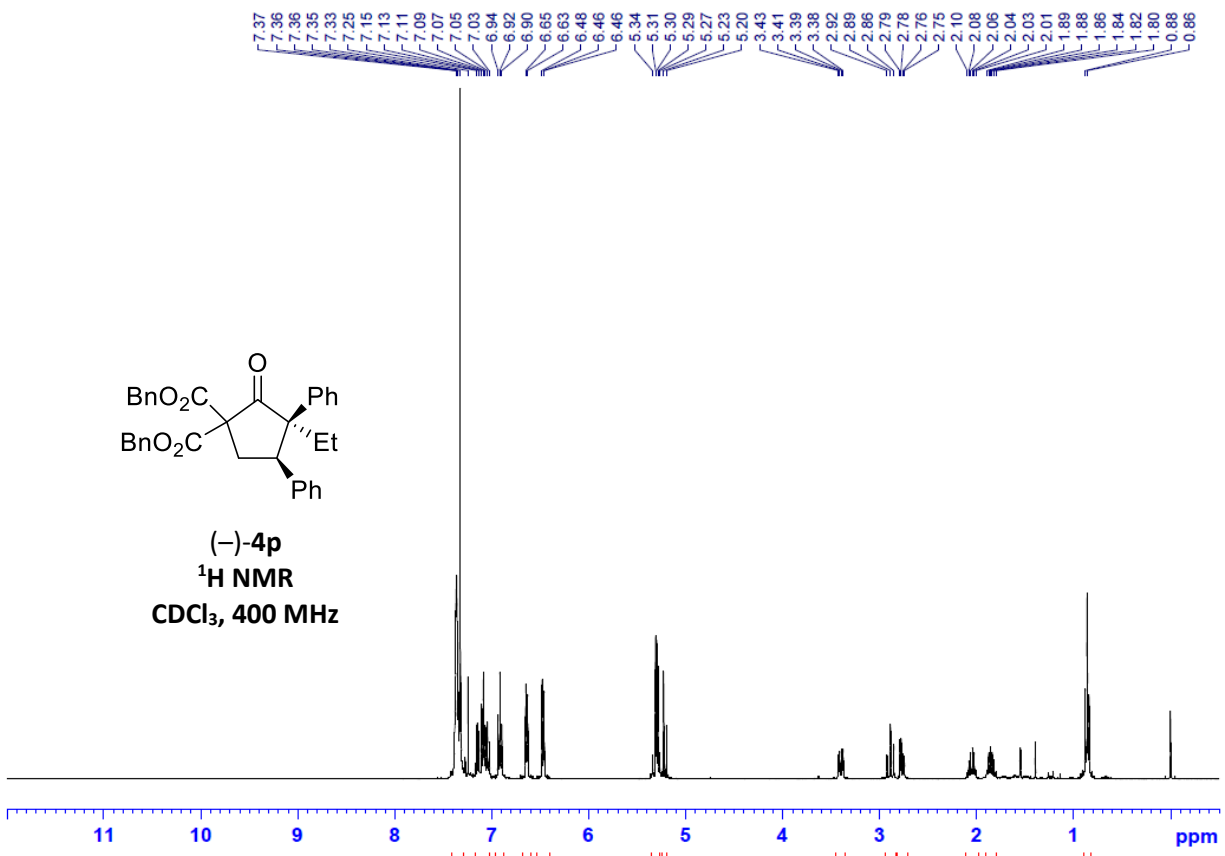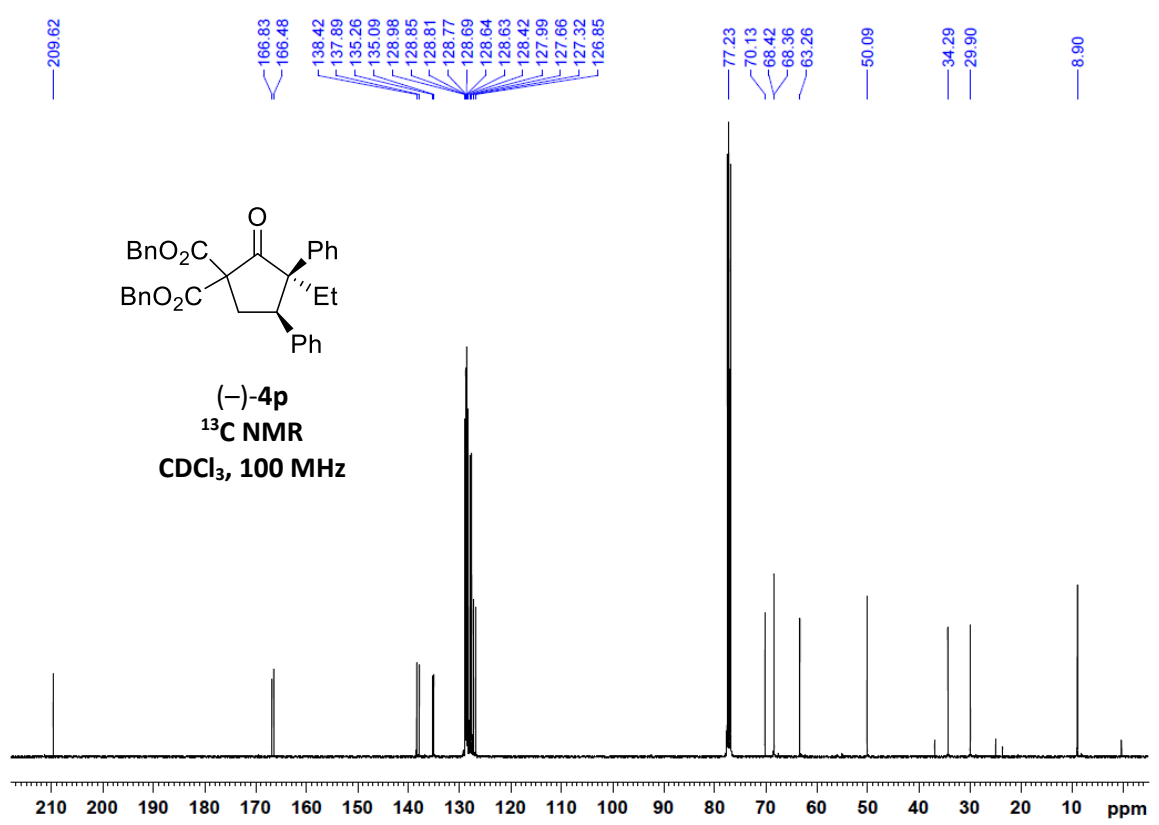

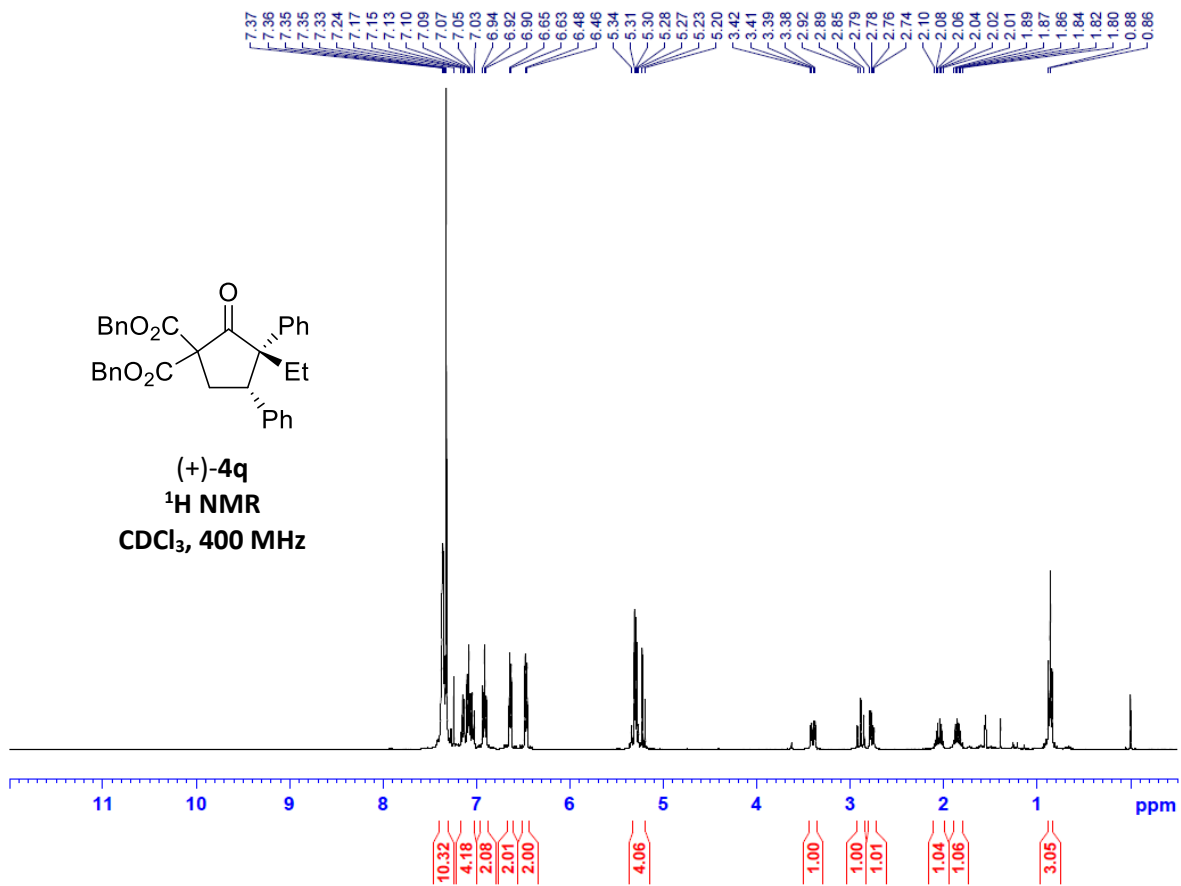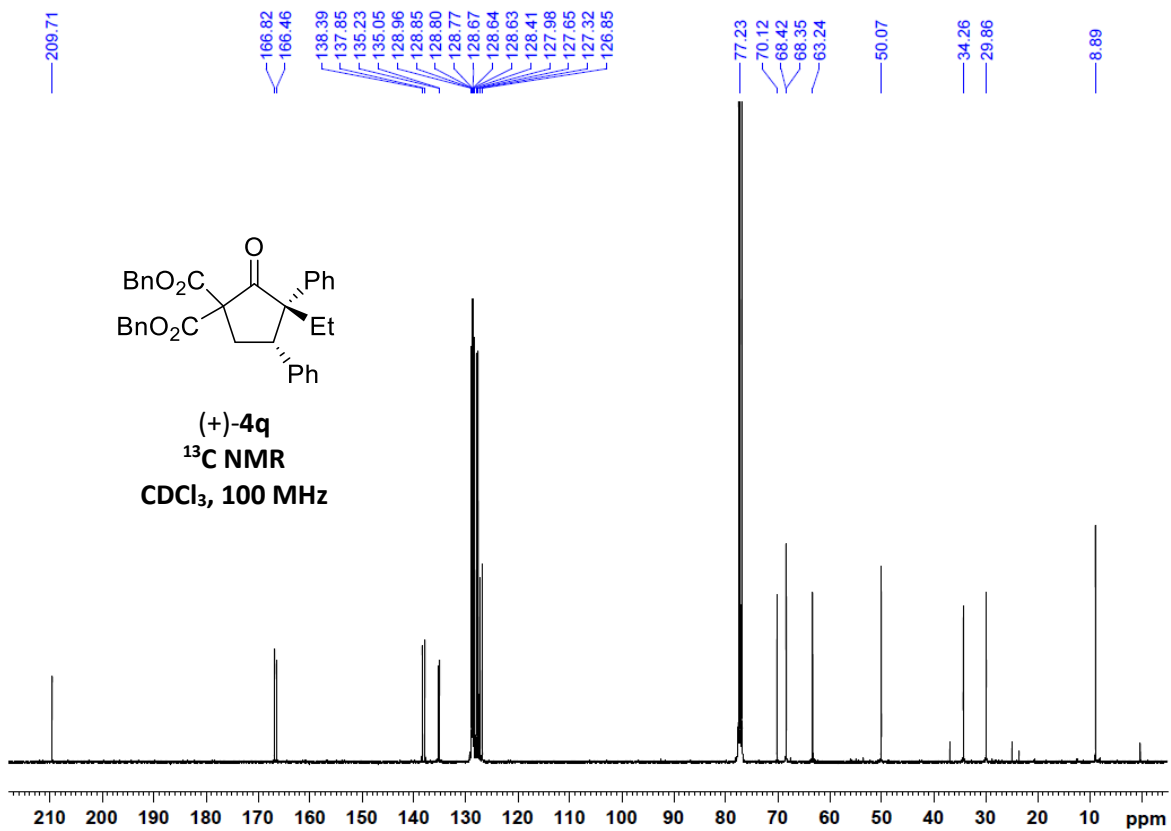

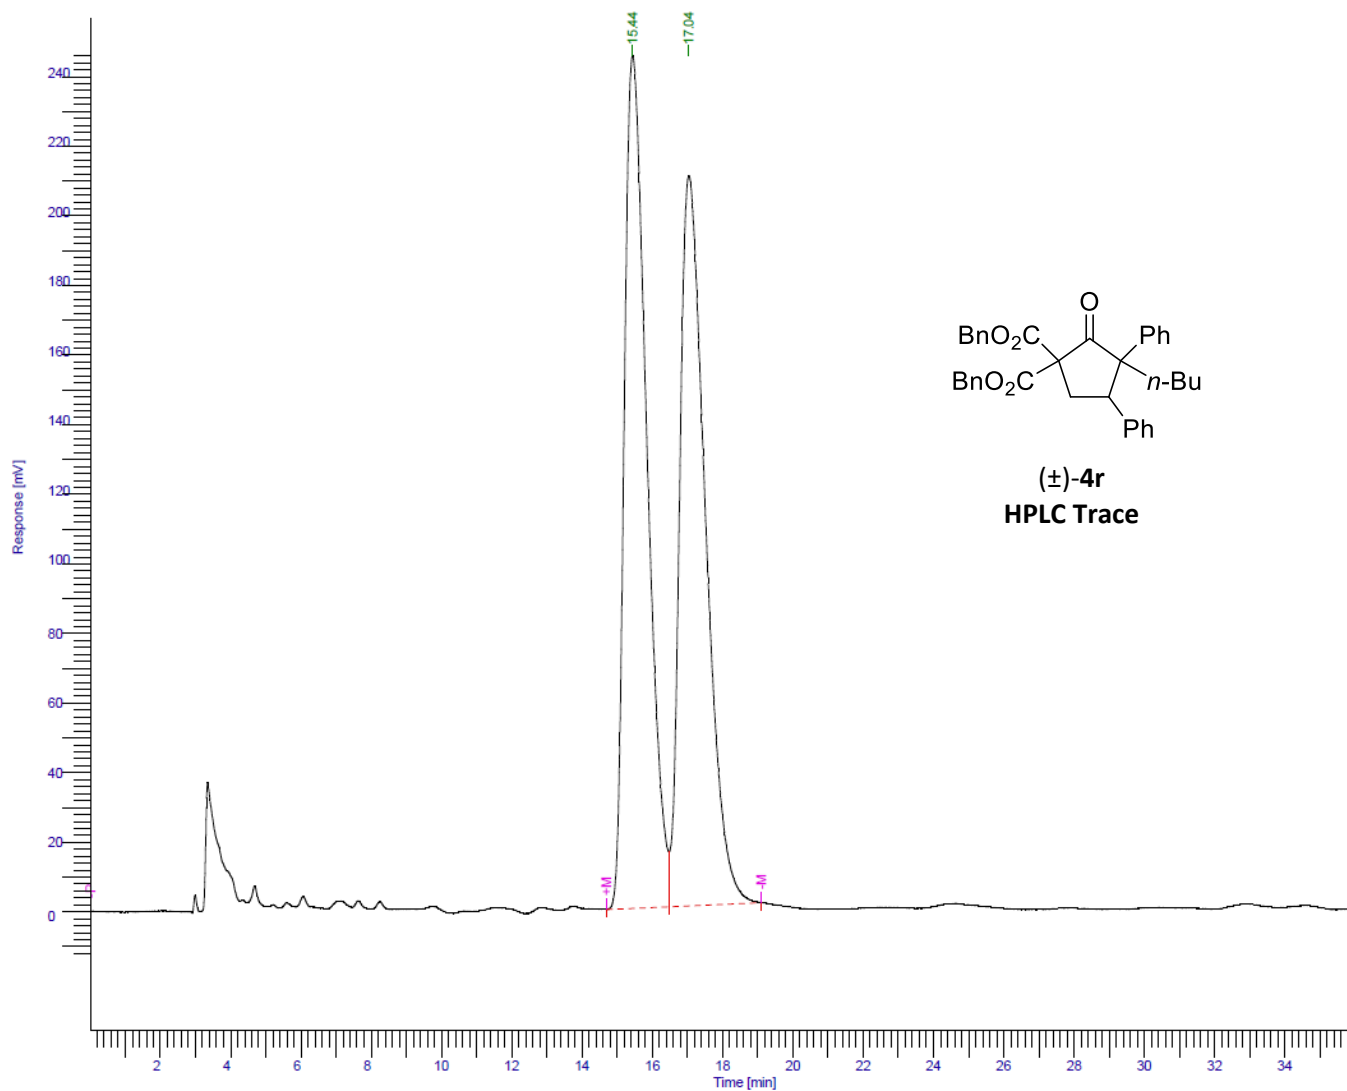

| Peak # | Time [min] | Area [ $\mu\text{V}\cdot\text{s}$ ] | Height [ $\mu\text{V}$ ] | Area [%] | Norm. Area [%] | BL  | Area/Height [s] |
|--------|------------|-------------------------------------|--------------------------|----------|----------------|-----|-----------------|
| 1      | 15.438     | 10964327.66                         | 245057.12                | 50.54    | 50.54          | *BV | 44.7419         |
| 2      | 17.039     | 10730991.86                         | 209876.99                | 49.46    | 49.46          | *VB | 51.1299         |
|        |            | 21695319.52                         | 454934.11                | 100.00   | 100.00         |     |                 |

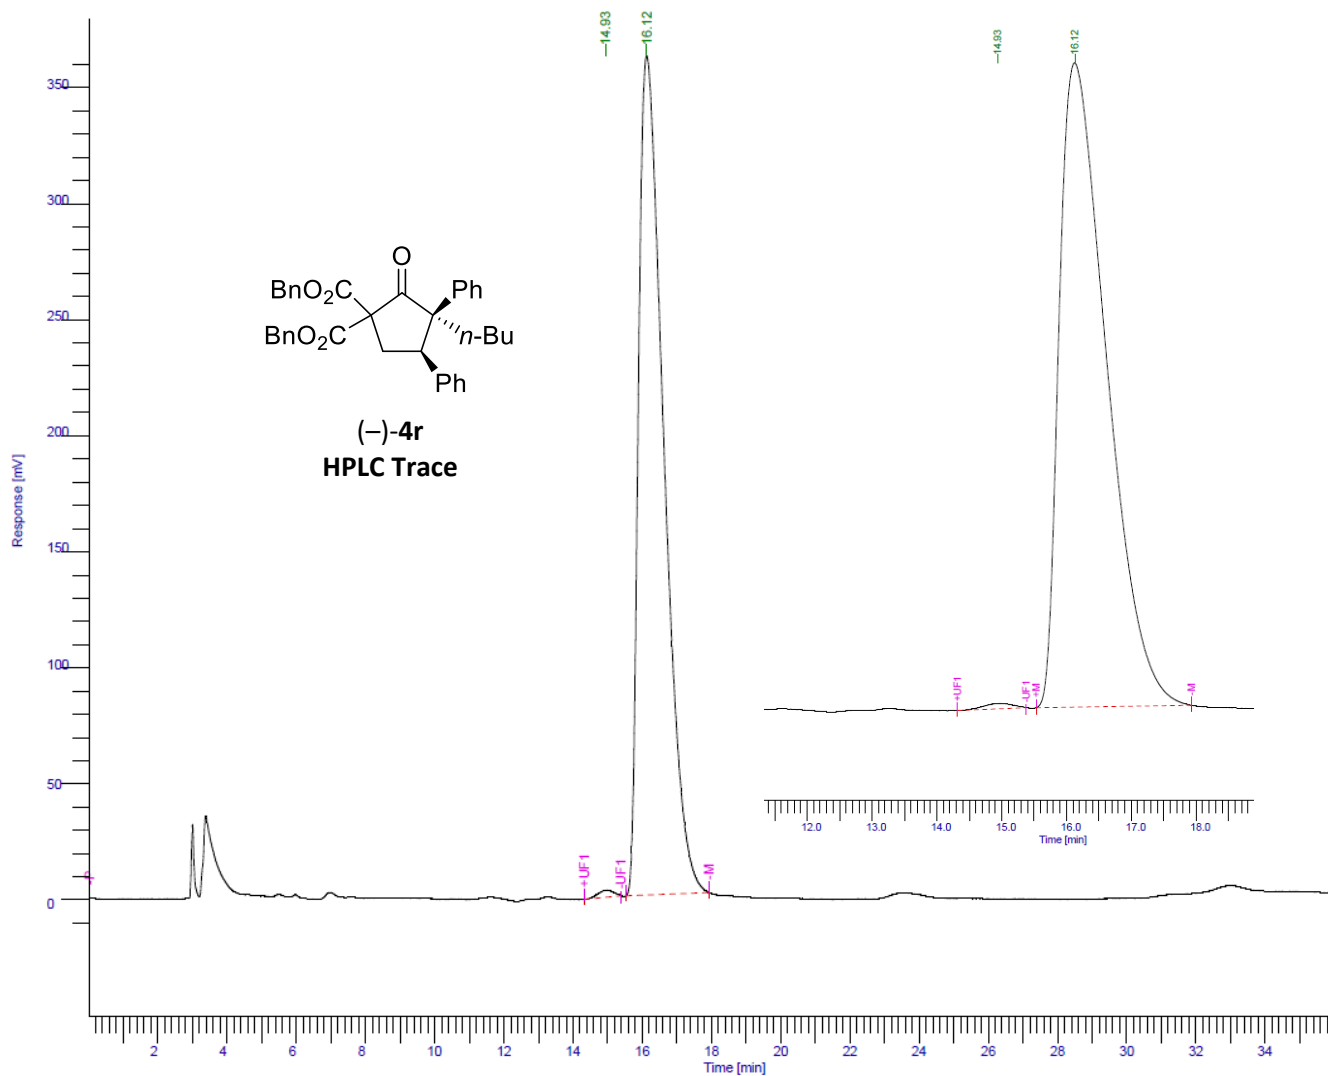

| Peak # | Time [min] | Area [ $\mu\text{V}\cdot\text{s}$ ] | Height [ $\mu\text{V}$ ] | Area [%] | Norm. Area [%] | BL  | Area/Height [s] |
|--------|------------|-------------------------------------|--------------------------|----------|----------------|-----|-----------------|
| 1      | 14.931     | 93511.21                            | 3023.97                  | 0.51     | 0.51           | *MM | 30.9233         |
| 2      | 16.125     | 18344000.77                         | 361621.01                | 99.49    | 99.49          | *BB | 50.7271         |
|        |            | 18437511.98                         | 364644.98                | 100.00   | 100.00         |     |                 |

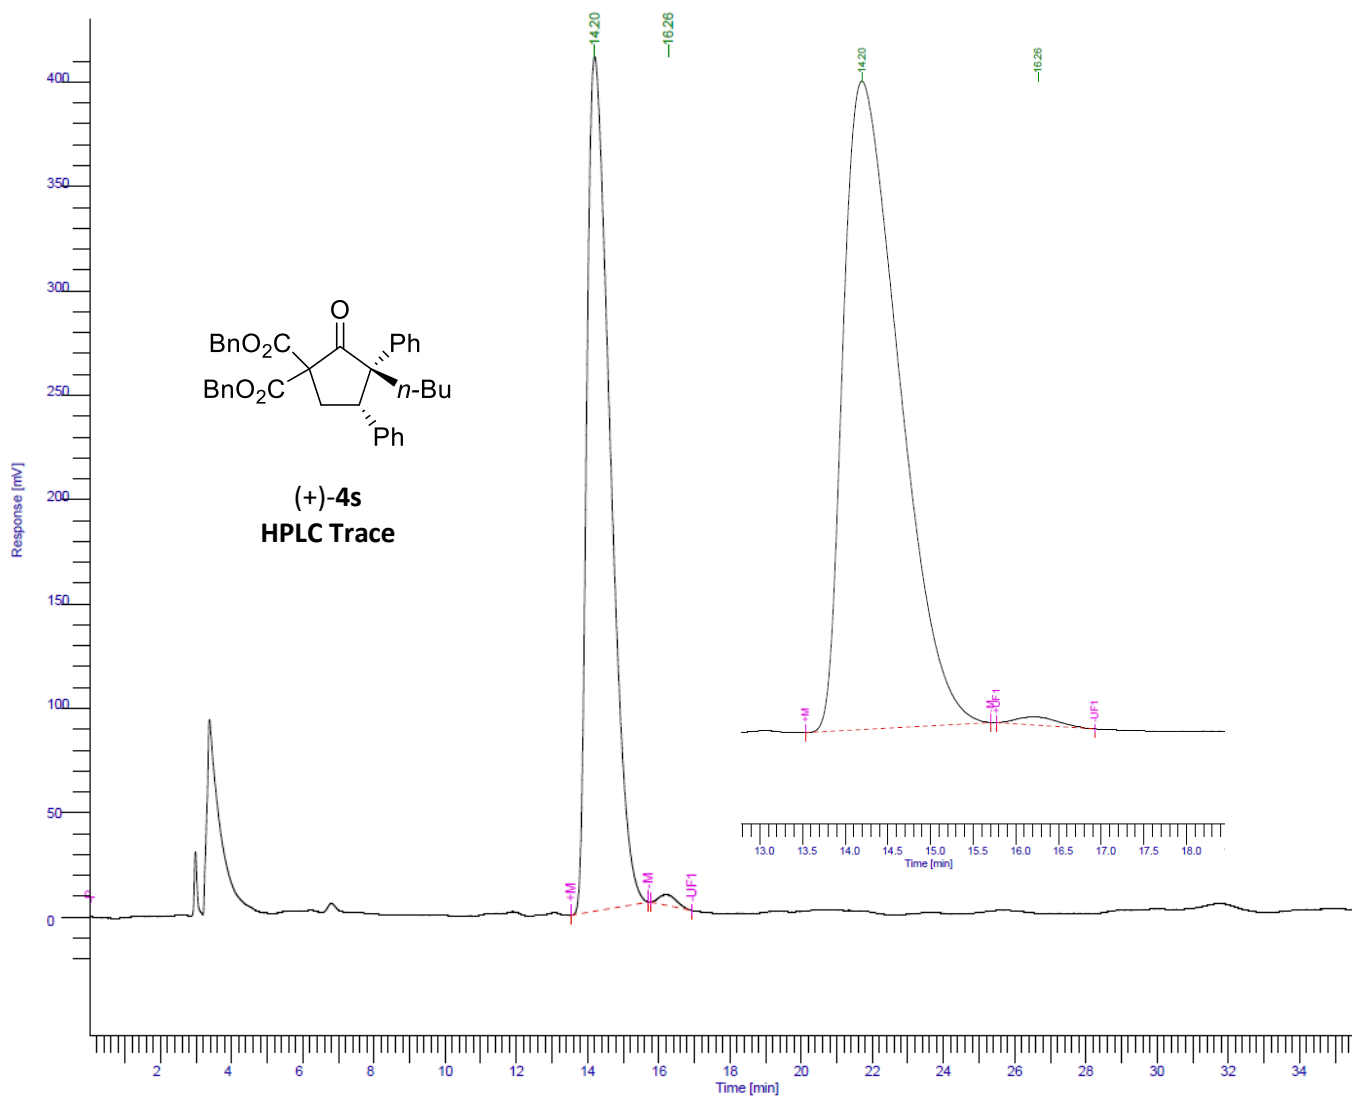

| Peak # | Time [min] | Area [ $\mu\text{V}\cdot\text{s}$ ] | Height [ $\mu\text{V}$ ] | Area [%] | Norm. Area [%] | BL  | Area/Height [s] |
|--------|------------|-------------------------------------|--------------------------|----------|----------------|-----|-----------------|
| 1      | 14.195     | 18607849.50                         | 409338.15                | 99.06    | 99.06          | *BB | 45.4584         |
| 2      | 16.258     | 175692.55                           | 5202.93                  | 0.94     | 0.94           | *MM | 33.7680         |
|        |            | 18783542.05                         | 414541.08                | 100.00   | 100.00         |     |                 |



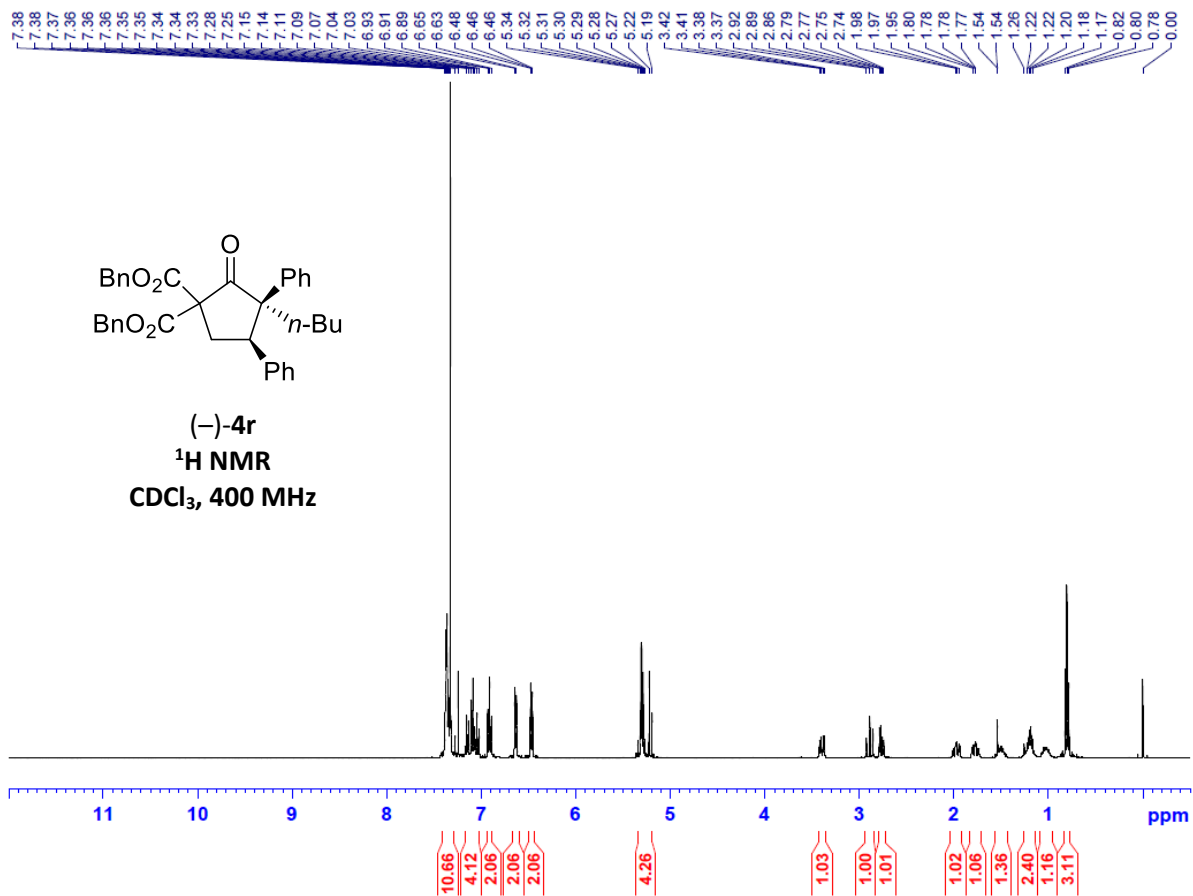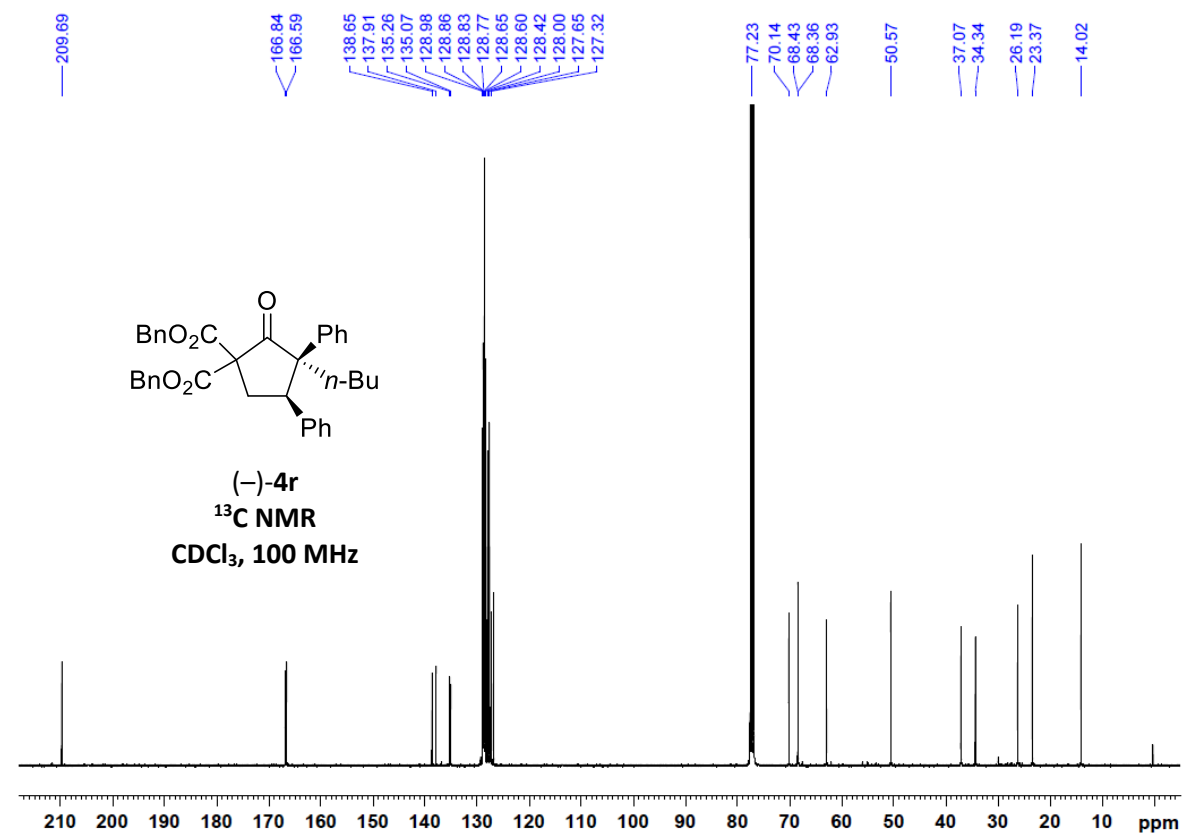

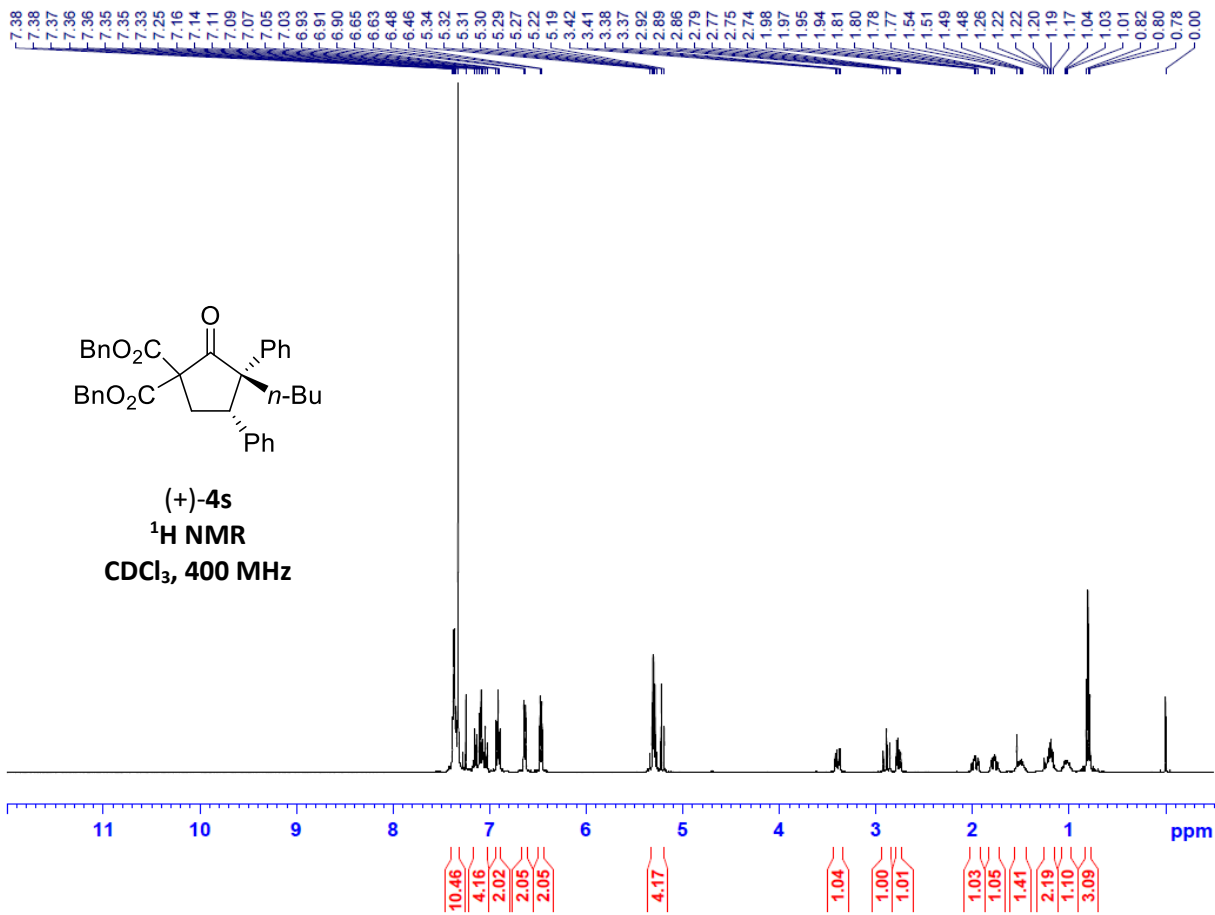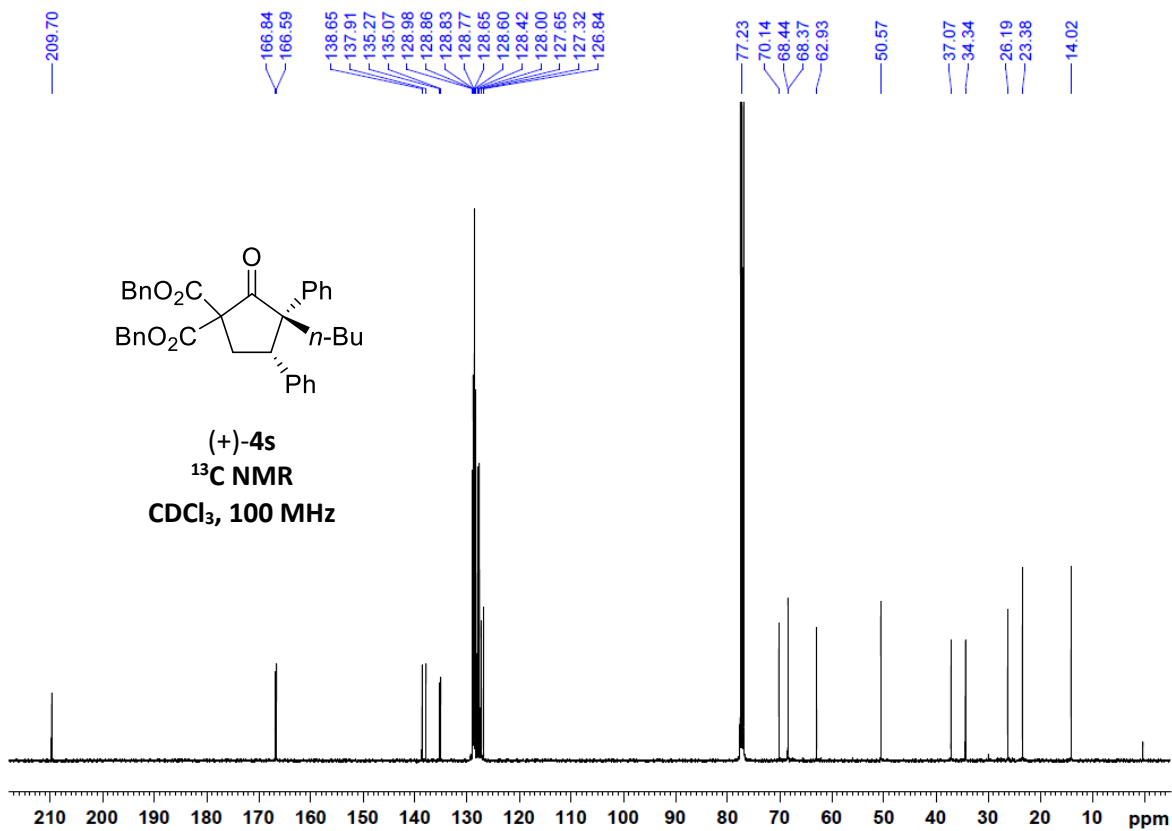

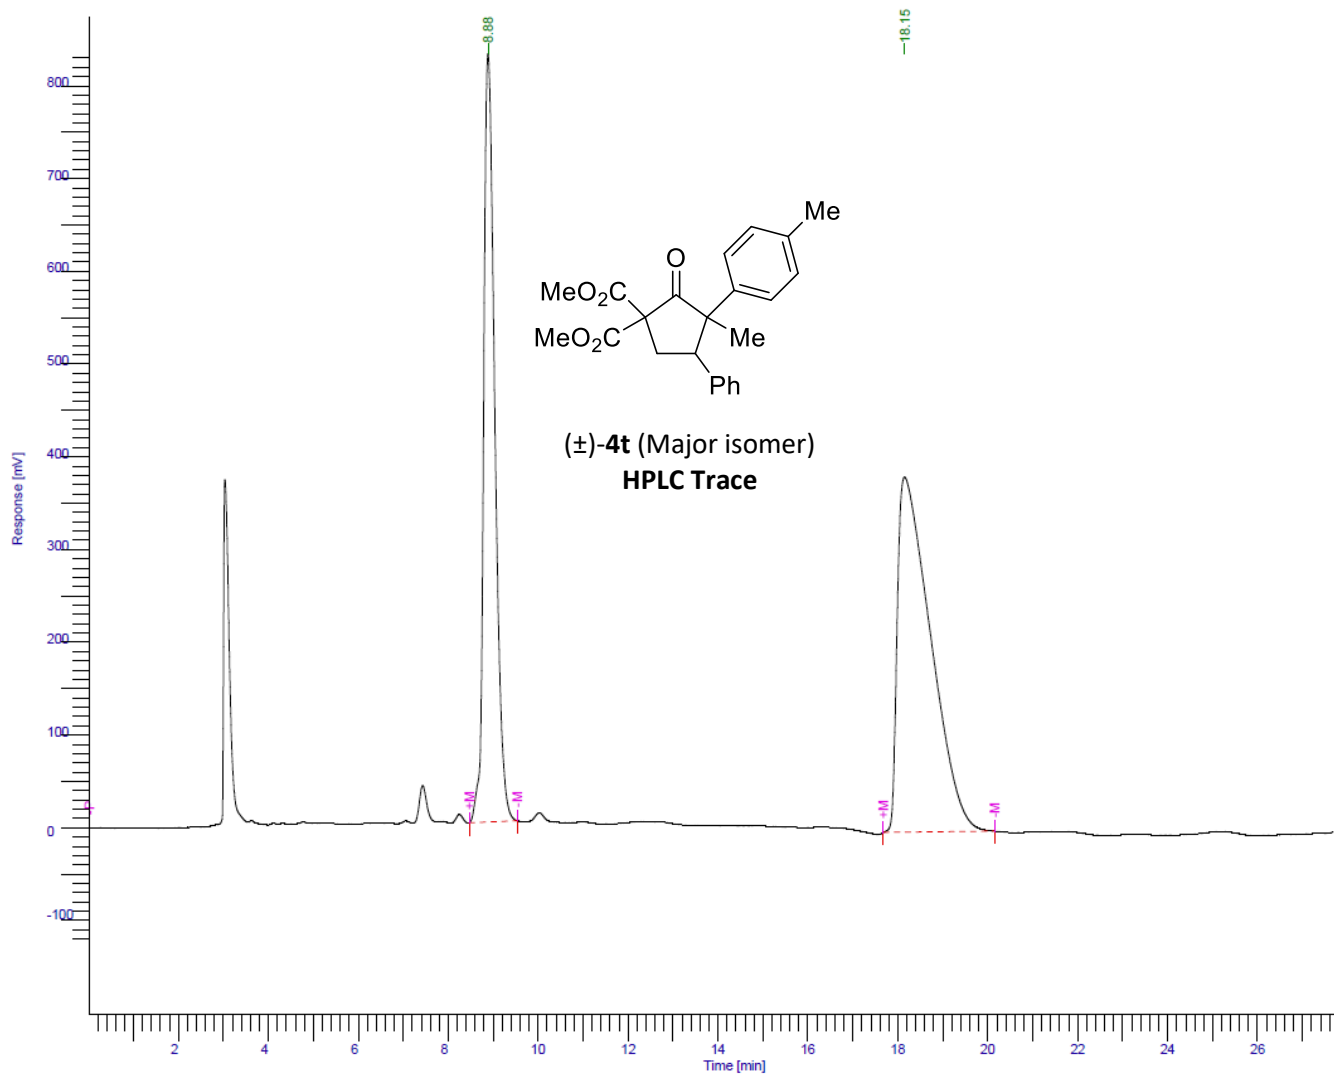

| Peak # | Time [min] | Area [ $\mu\text{V}\cdot\text{s}$ ] | Height [ $\mu\text{V}$ ] | Area [%] | Norm. Area [%] | BL  | Area/Height [s] |
|--------|------------|-------------------------------------|--------------------------|----------|----------------|-----|-----------------|
| 1      | 8.883      | 14322479.16                         | 828458.06                | 42.26    | 42.26          | *BB | 17.2881         |
| 2      | 18.147     | 19572471.34                         | 382773.89                | 57.74    | 57.74          | *BB | 51.1332         |
|        |            | 33894950.50                         | 1.21e+06                 | 100.00   | 100.00         |     |                 |

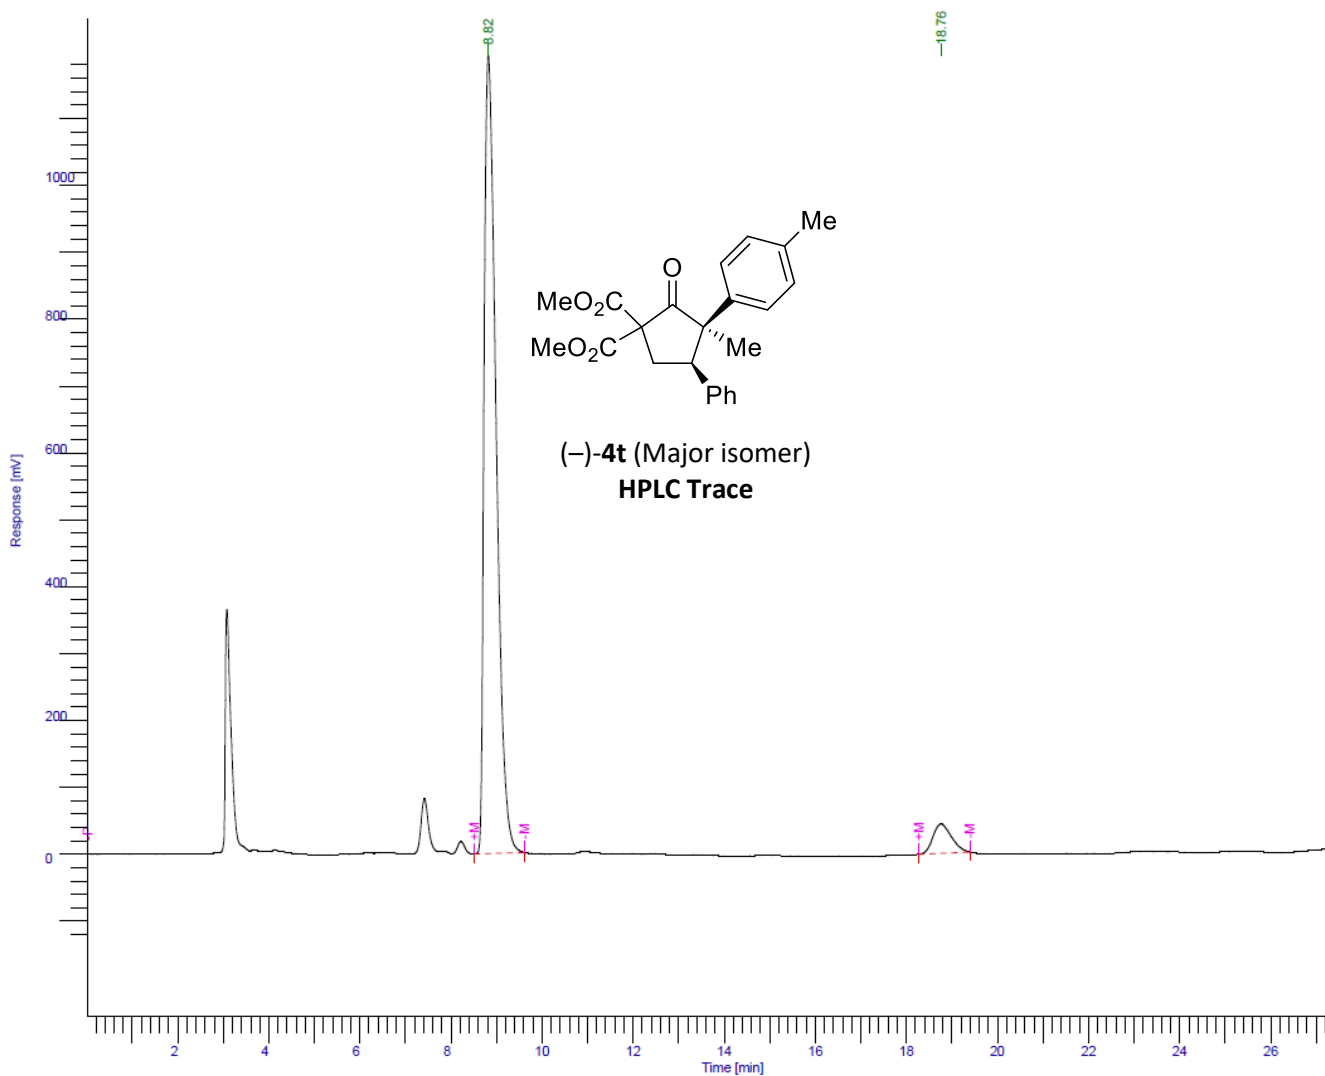

| Peak # | Time [min] | Area [ $\mu\text{V}\cdot\text{s}$ ] | Height [ $\mu\text{V}$ ] | Area [%] | Norm. Area [%] | BL  | Area/Height [s] |
|--------|------------|-------------------------------------|--------------------------|----------|----------------|-----|-----------------|
| 1      | 8.818      | 21888751.01                         | 1.19e+06                 | 94.68    | 94.68          | *BB | 18.3379         |
| 2      | 18.758     | 1230157.69                          | 43591.60                 | 5.32     | 5.32           | *BB | 28.2201         |
|        |            | 23118908.70                         | 1.24e+06                 | 100.00   | 100.00         |     |                 |

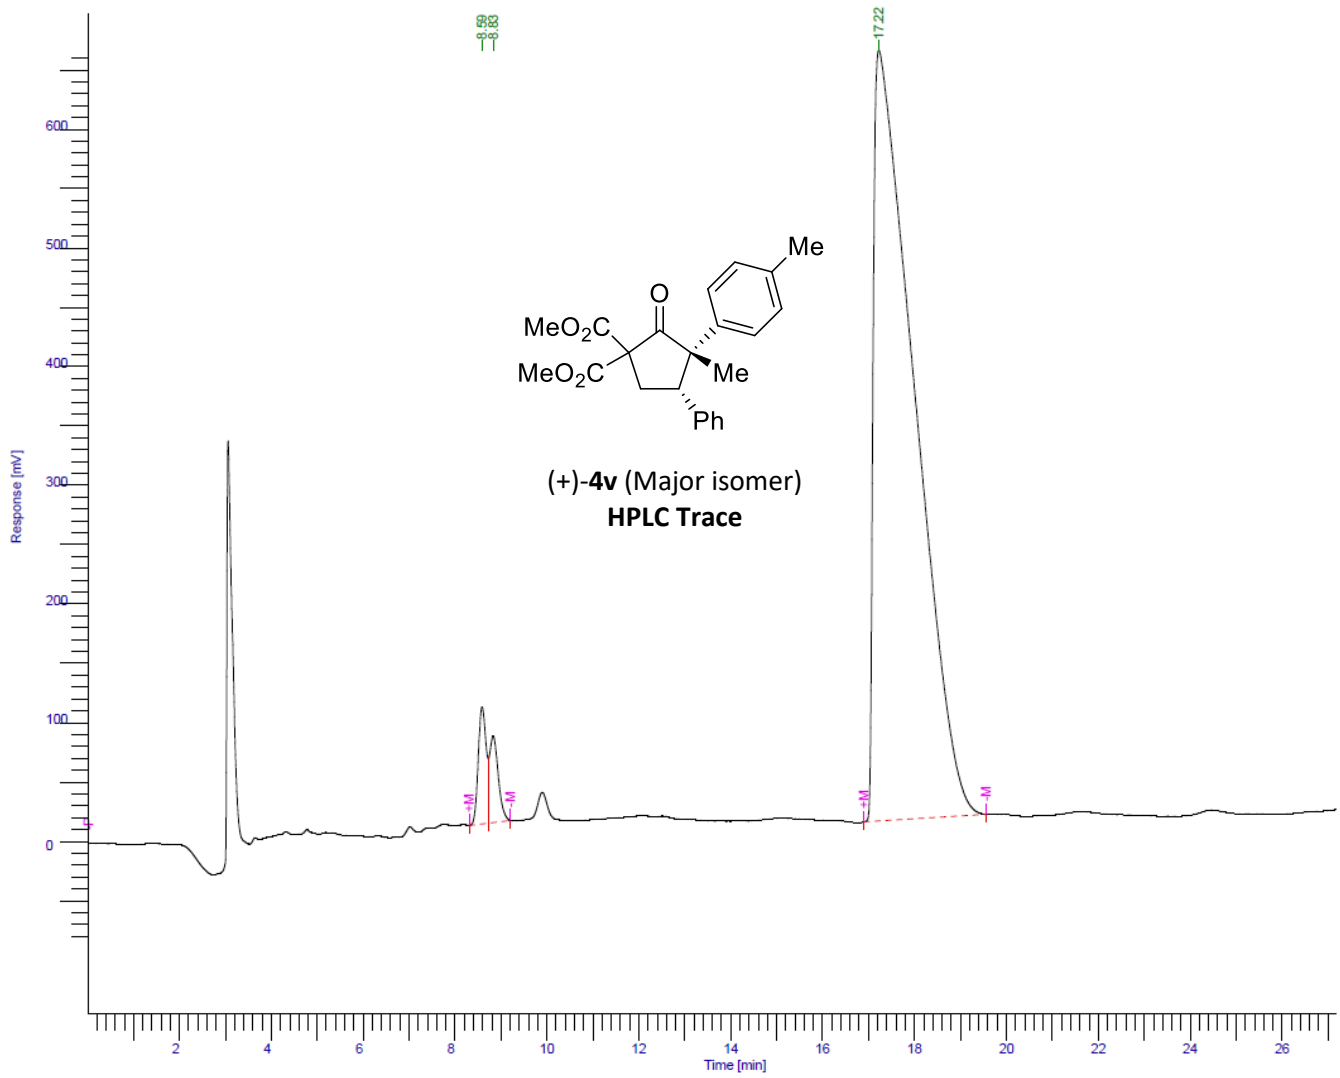

| Peak # | Time [min] | Area [ $\mu\text{V}\cdot\text{s}$ ] | Height [ $\mu\text{V}$ ] | Area [%] | Norm. Area [%] | BL  | Area/Height [s] |
|--------|------------|-------------------------------------|--------------------------|----------|----------------|-----|-----------------|
| 1      | 8.588      | 1184251.19                          | 98528.17                 | 2.81     | 2.81           | *BV | 12.0194         |
| 2      | 8.828      | 980576.11                           | 72790.40                 | 2.33     | 2.33           | *VB | 13.4712         |
| 3      | 17.222     | 39972194.75                         | 649360.76                | 94.86    | 94.86          | *BB | 61.5562         |
|        |            | 42137022.05                         | 820679.32                | 100.00   | 100.00         |     |                 |

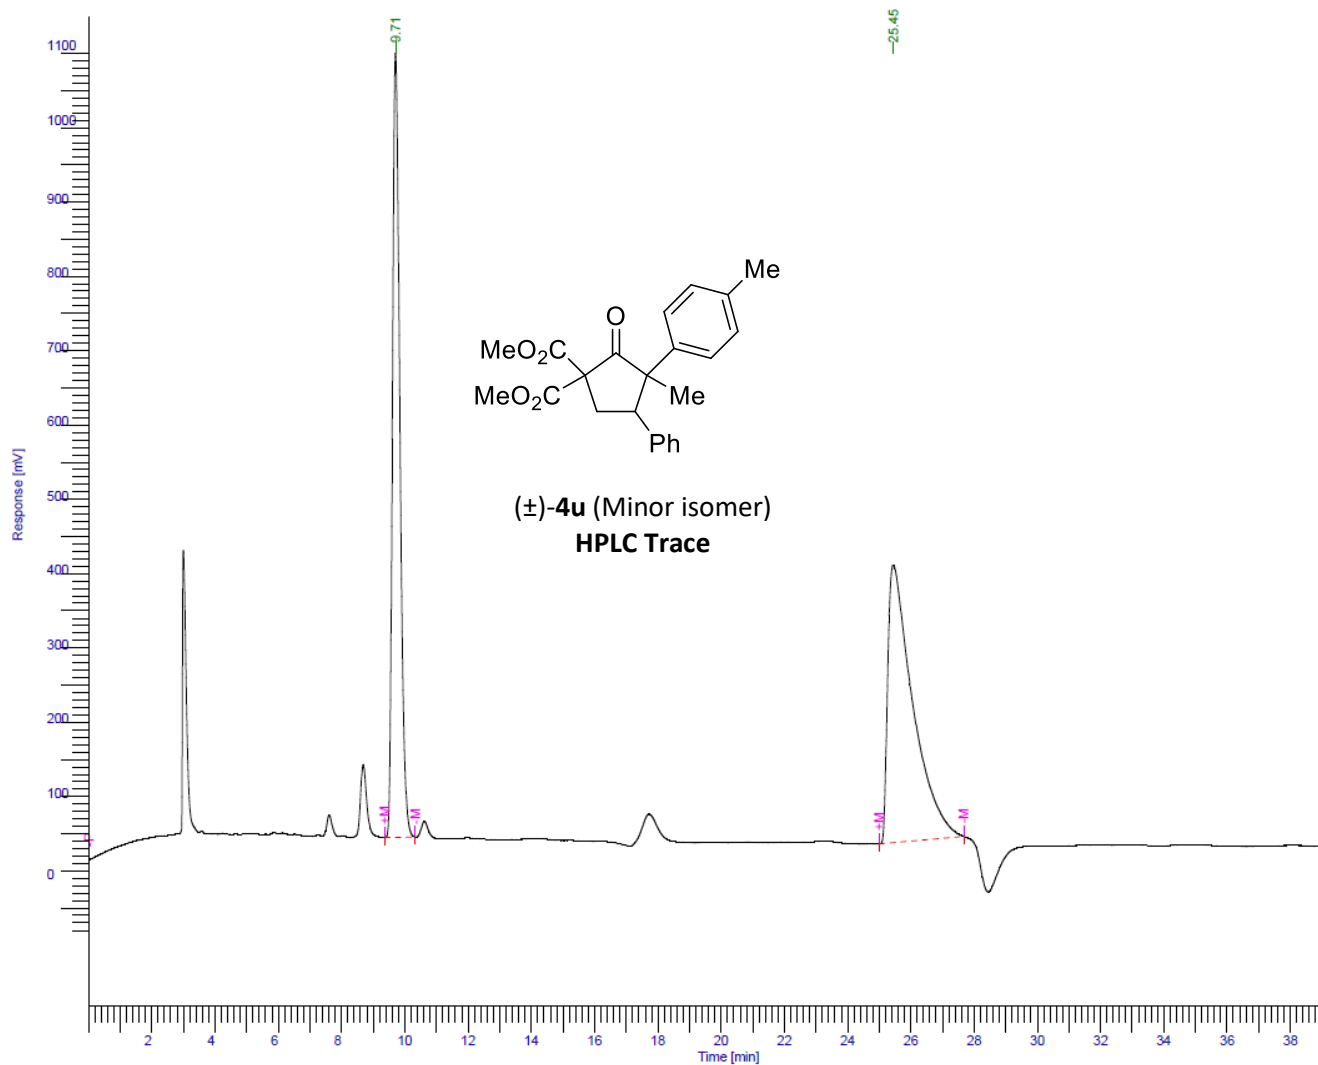

| Peak # | Time [min] | Area [μV·s] | Height [μV] | Area [%] | Norm. Area [%] | BL  | Area/Height [s] |
|--------|------------|-------------|-------------|----------|----------------|-----|-----------------|
| 1      | 9.706      | 17169640.96 | 1.06e+06    | 45.55    | 45.55          | *BB | 16.2644         |
| 2      | 25.447     | 20523936.73 | 373694.76   | 54.45    | 54.45          | *BB | 54.9217         |
|        |            | 37693577.69 | 1.43e+06    | 100.00   | 100.00         |     |                 |

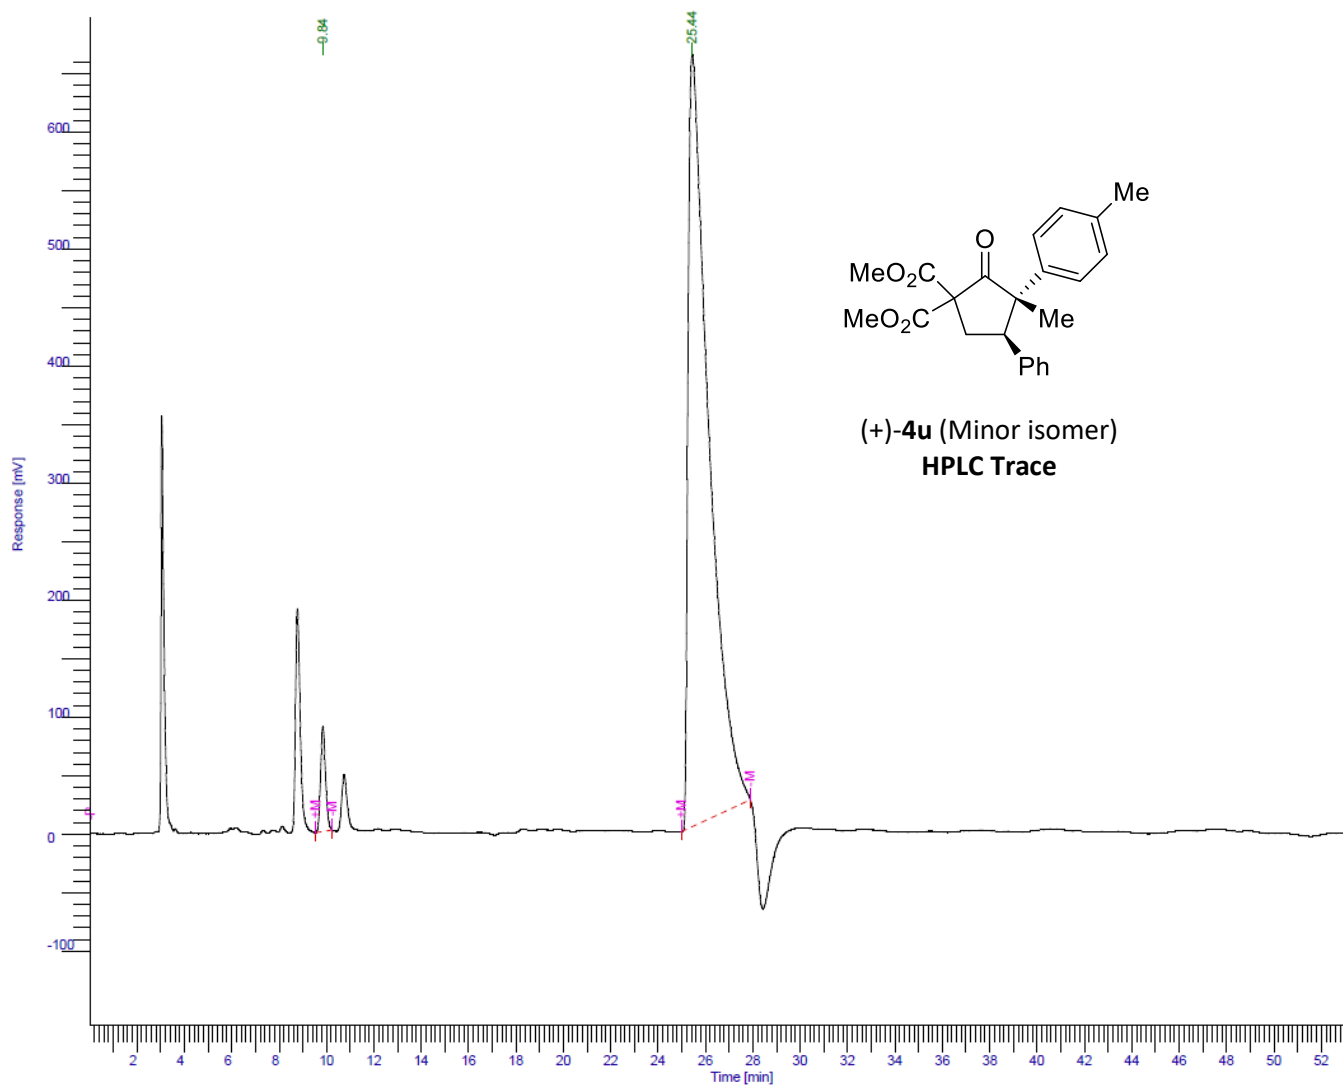

| Peak # | Time [min] | Area [ $\mu\text{V}\cdot\text{s}$ ] | Height [ $\mu\text{V}$ ] | Area [%] | Norm. Area [%] | BL  | Area/Height [s] |
|--------|------------|-------------------------------------|--------------------------|----------|----------------|-----|-----------------|
| 1      | 9.845      | 1298140.78                          | 89973.30                 | 3.14     | 3.14           | *BB | 14.4281         |
| 2      | 25.441     | 40100299.77                         | 659849.34                | 96.86    | 96.86          | *BB | 60.7719         |
|        |            | 41398440.55                         | 749822.65                | 100.00   | 100.00         |     |                 |

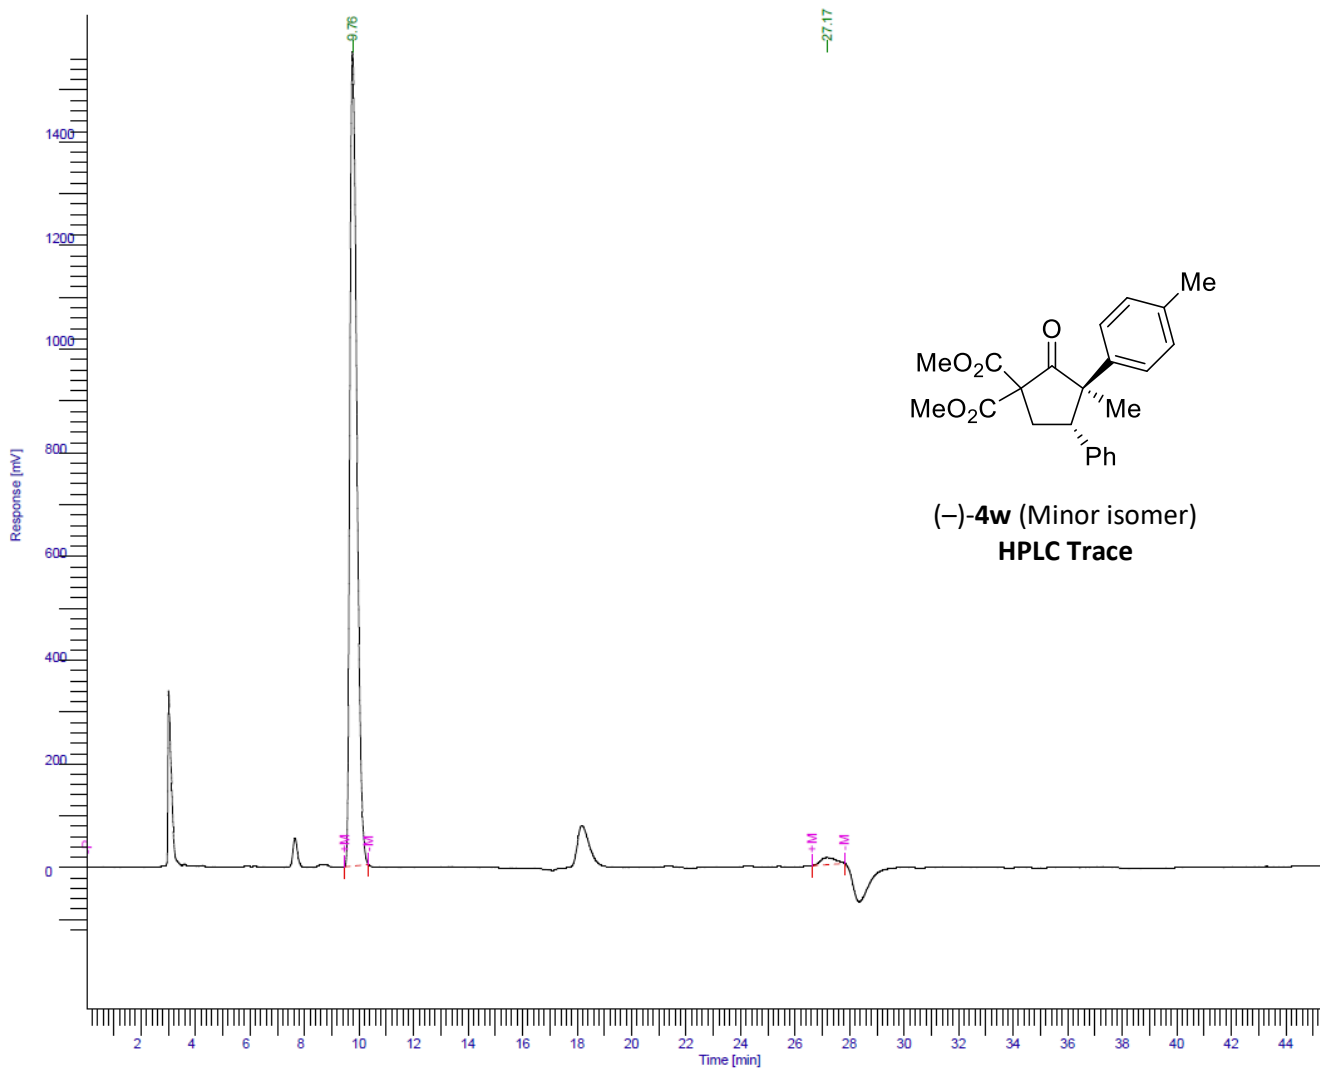

| Peak # | Time [min] | Area [ $\mu\text{V}\cdot\text{s}$ ] | Height [ $\mu\text{V}$ ] | Area [%] | Norm. Area [%] | BL  | Area/Height [s] |
|--------|------------|-------------------------------------|--------------------------|----------|----------------|-----|-----------------|
| 1      | 9.758      | 28052123.39                         | 1.57e+06                 | 98.22    | 98.22          | *BB | 17.8604         |
| 2      | 27.175     | 509531.00                           | 13433.20                 | 1.78     | 1.78           | *BB | 37.9307         |
|        |            | 28561654.39                         | 1.58e+06                 | 100.00   | 100.00         |     |                 |



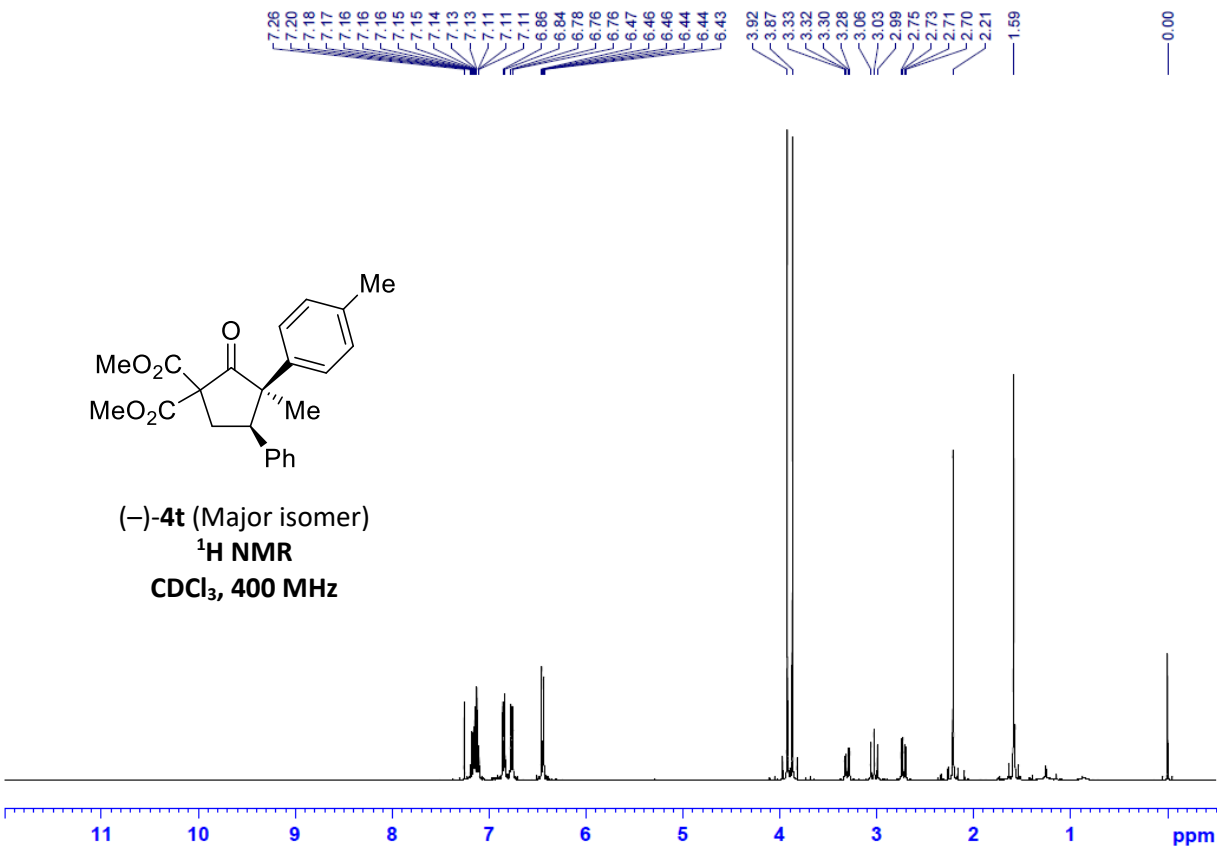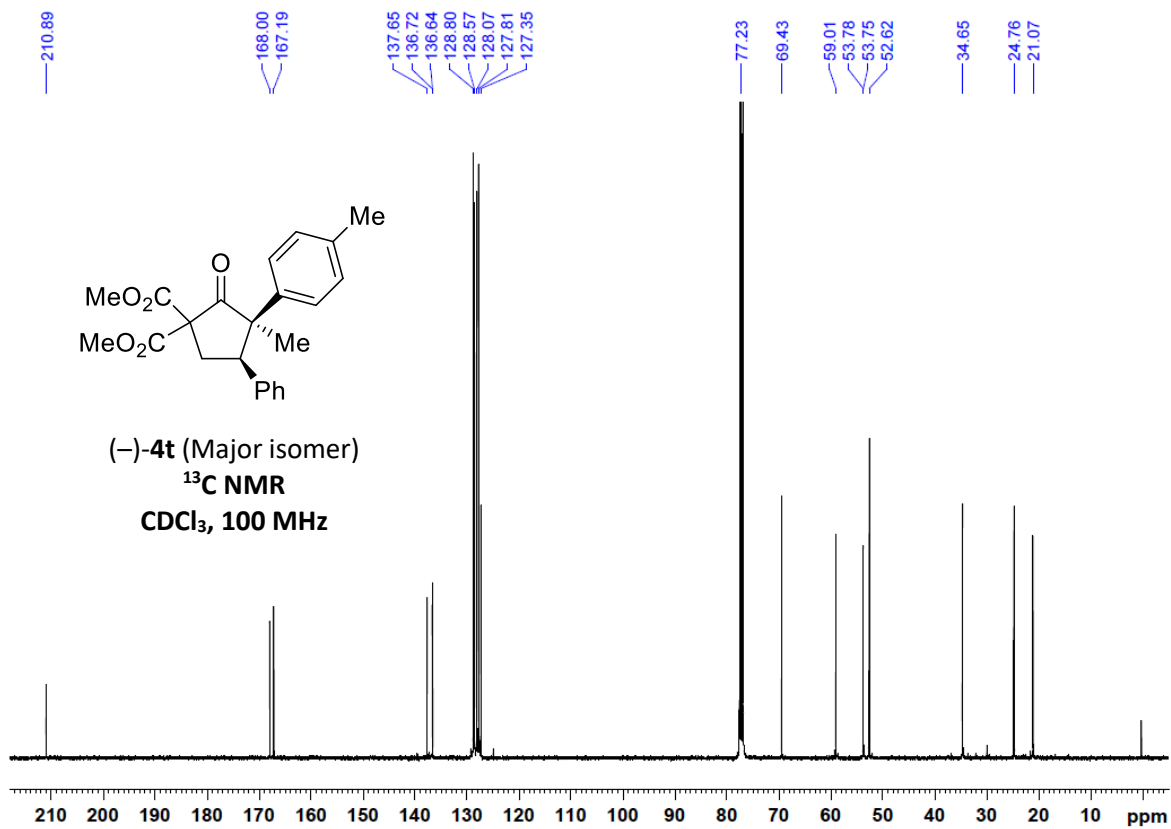

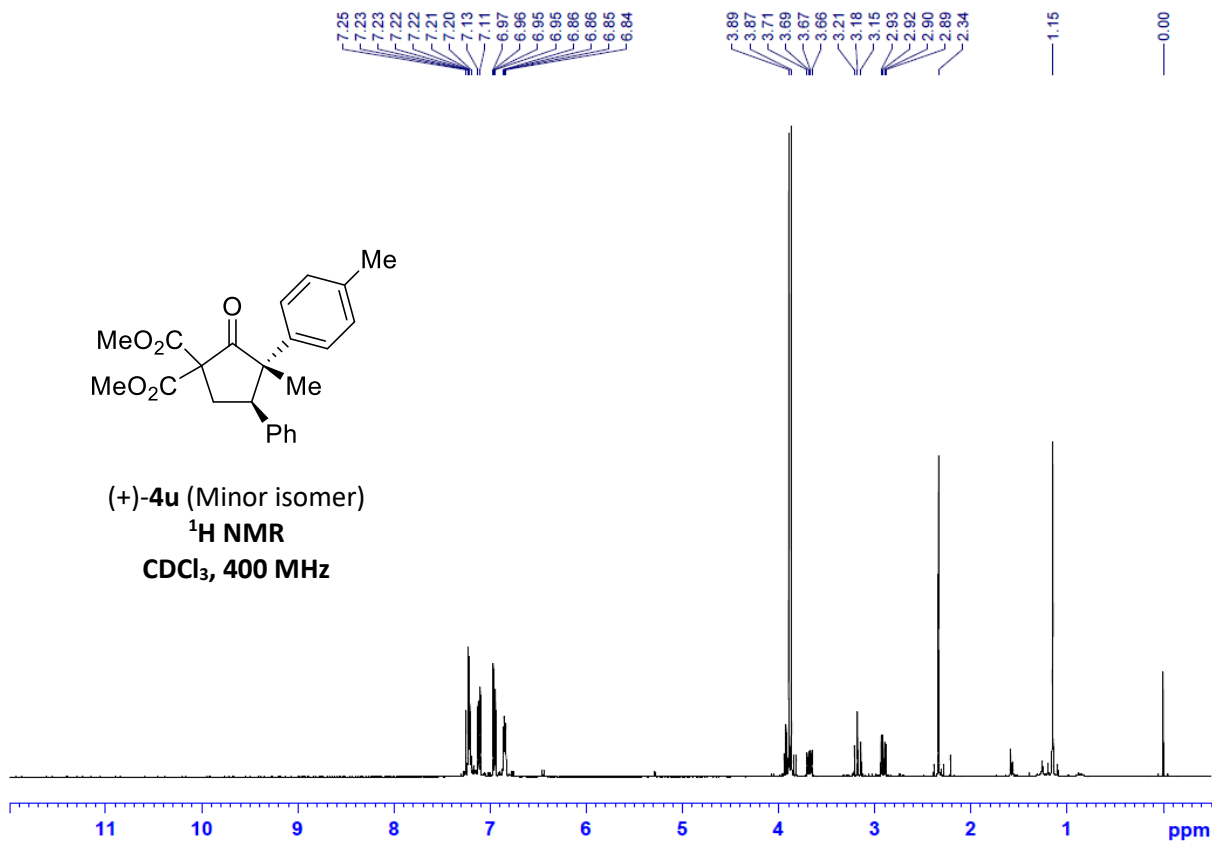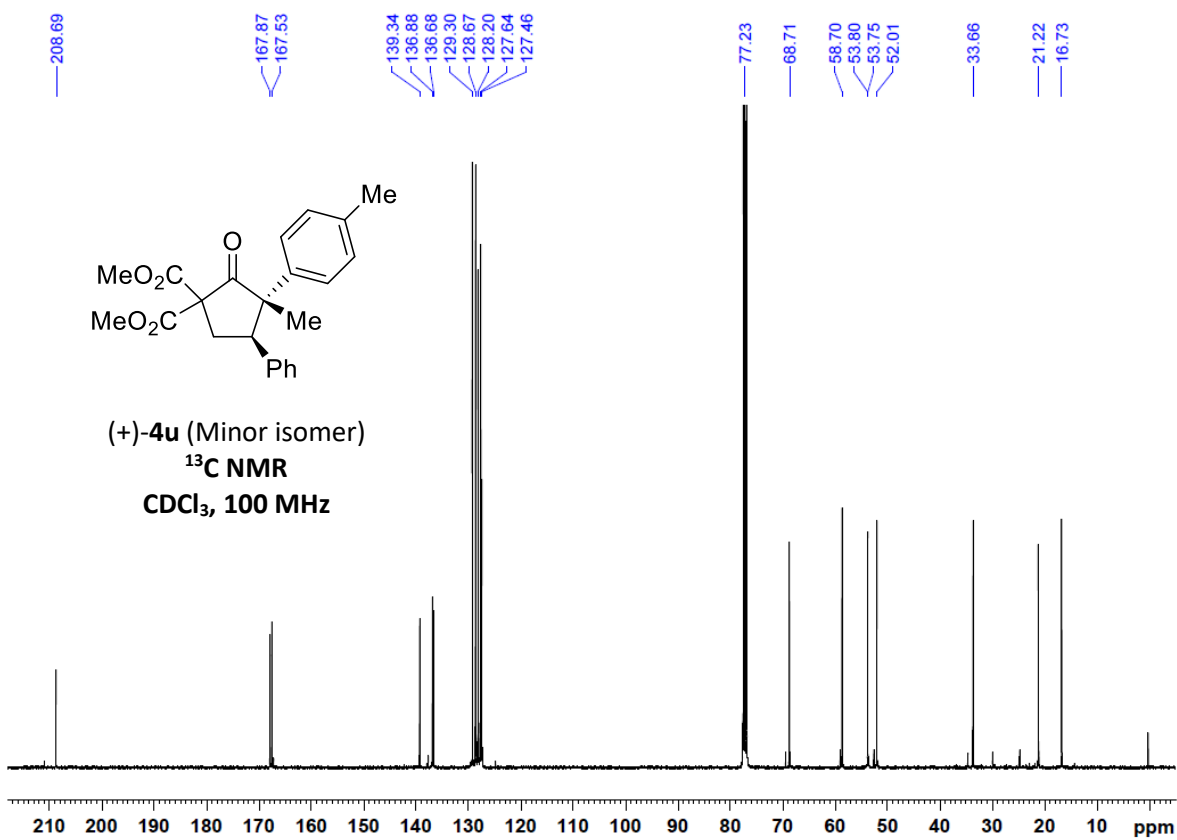

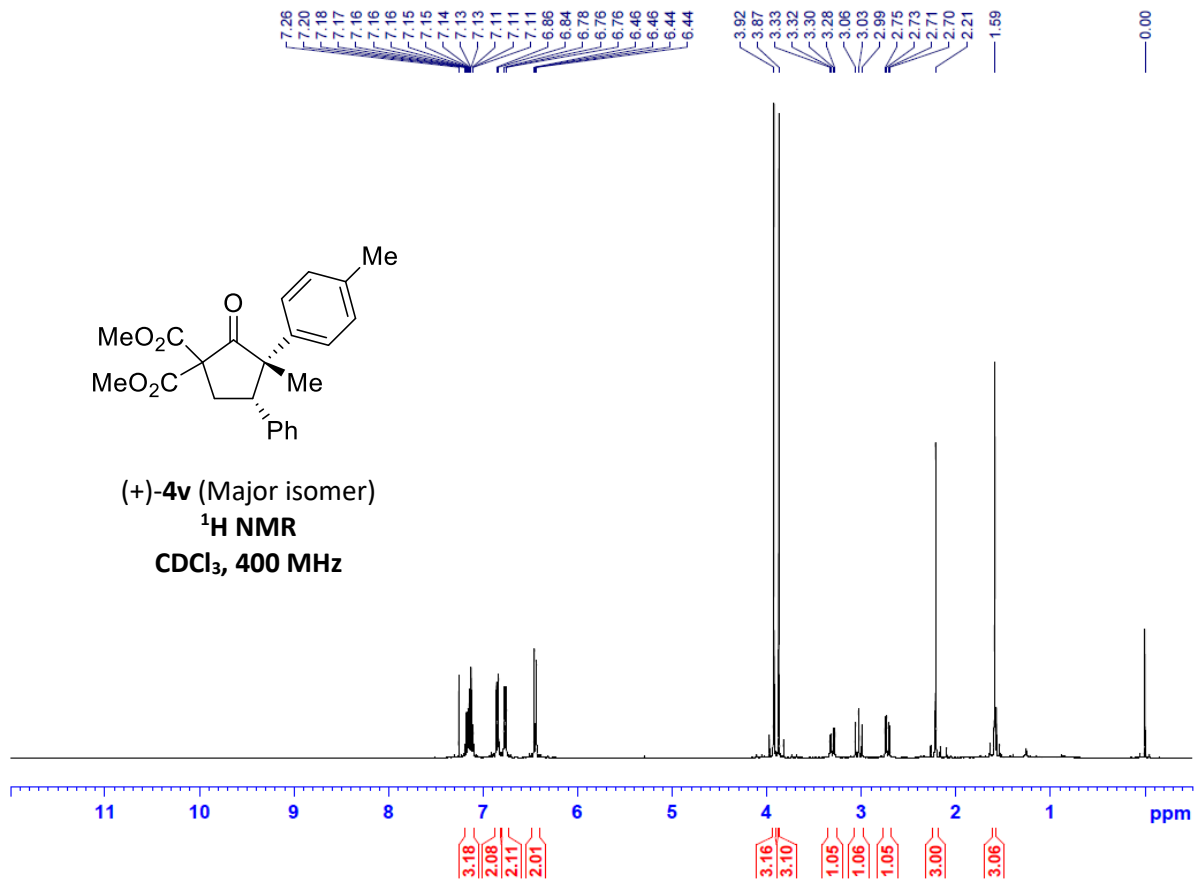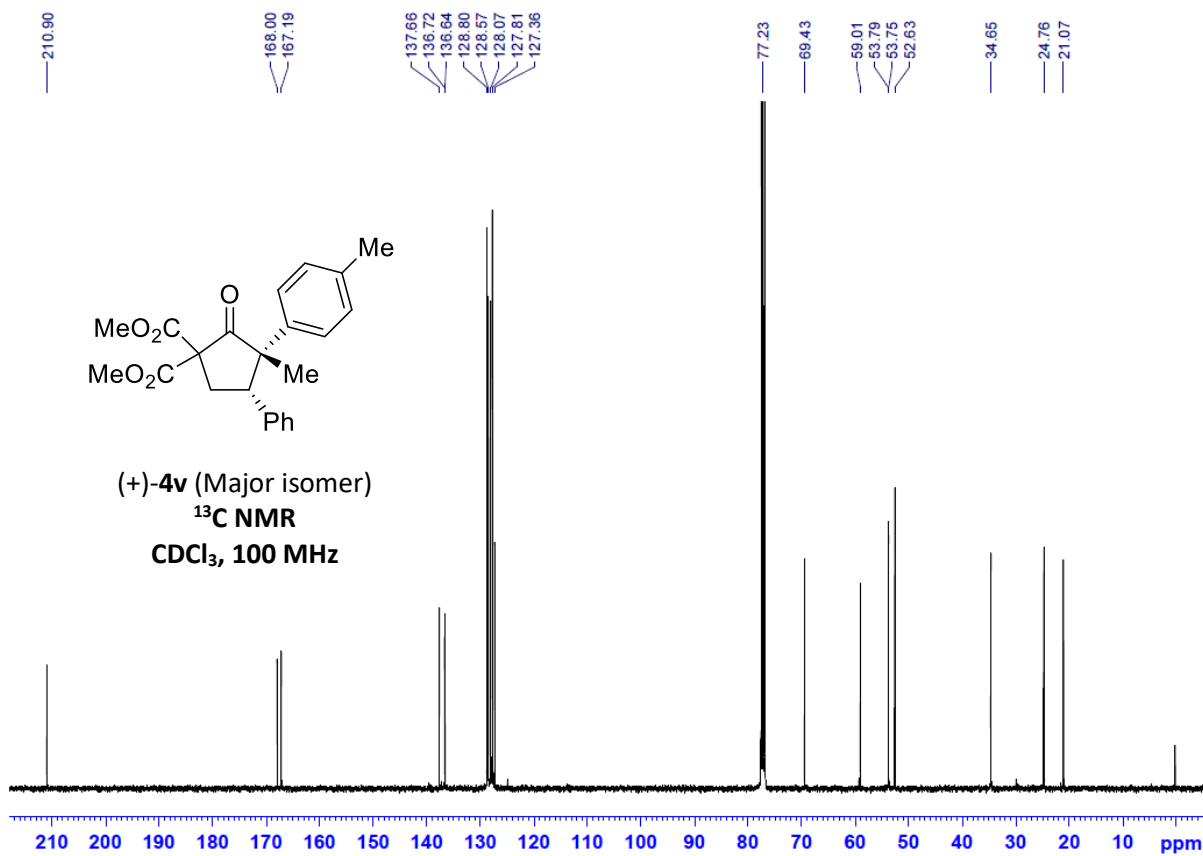

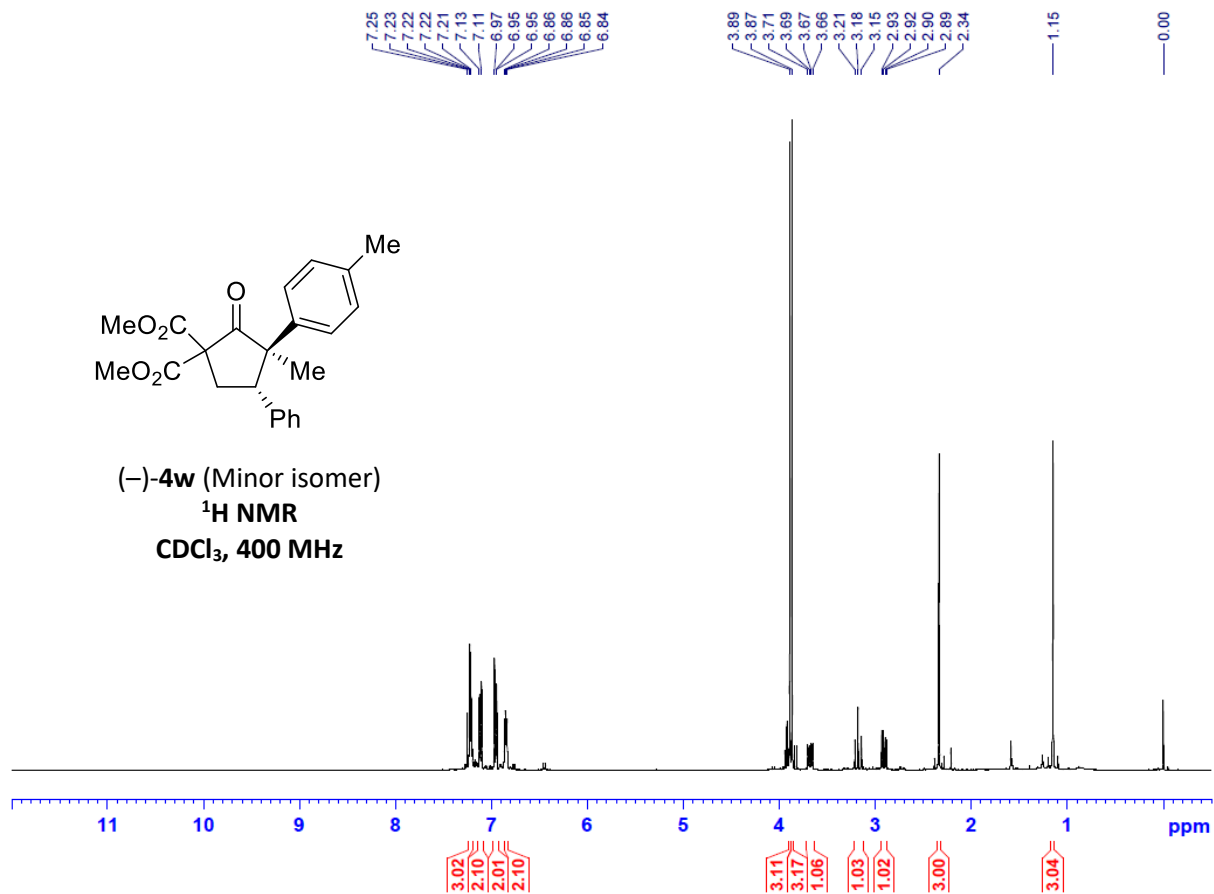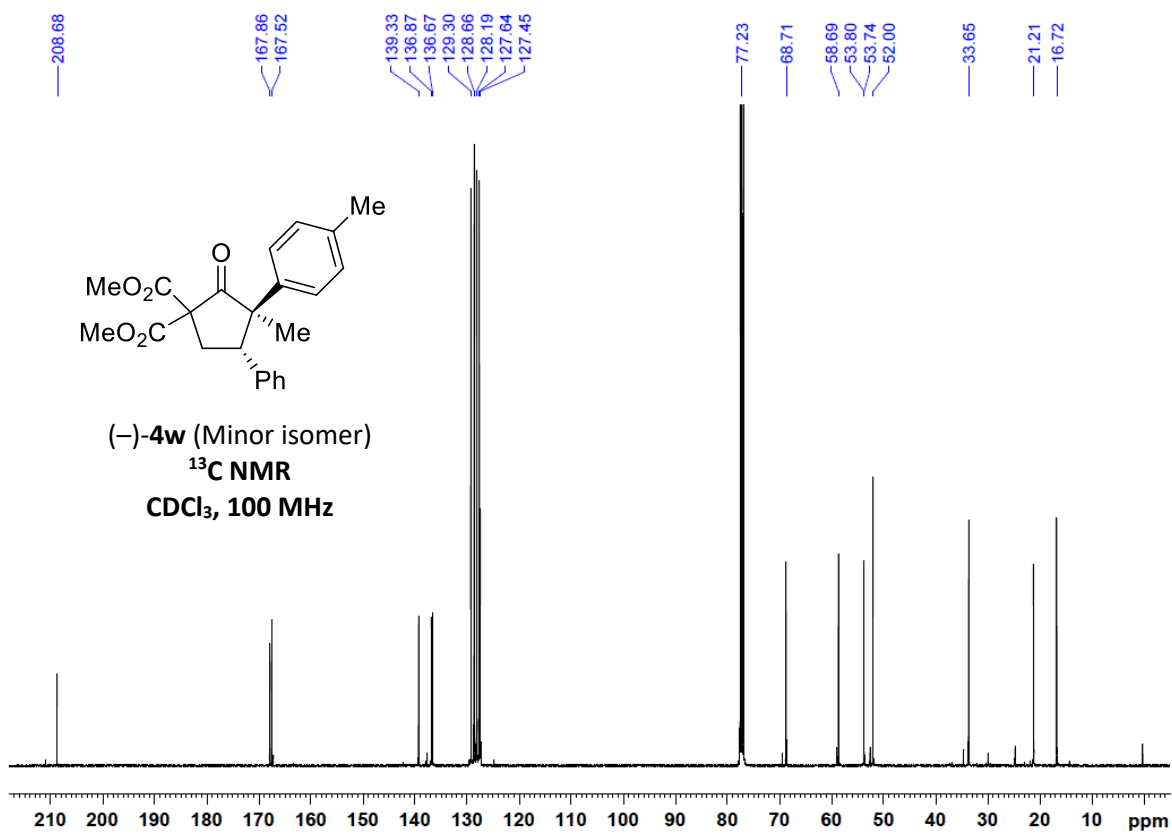

NK1-91-0 ESTER PROTON

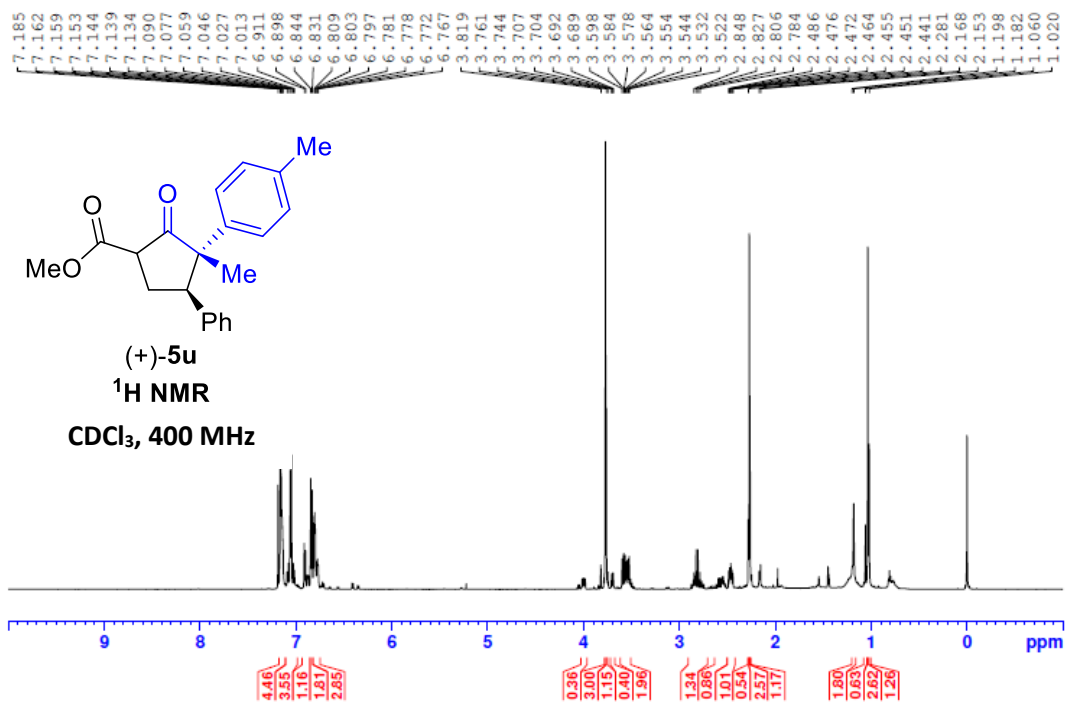

NK1-91-0

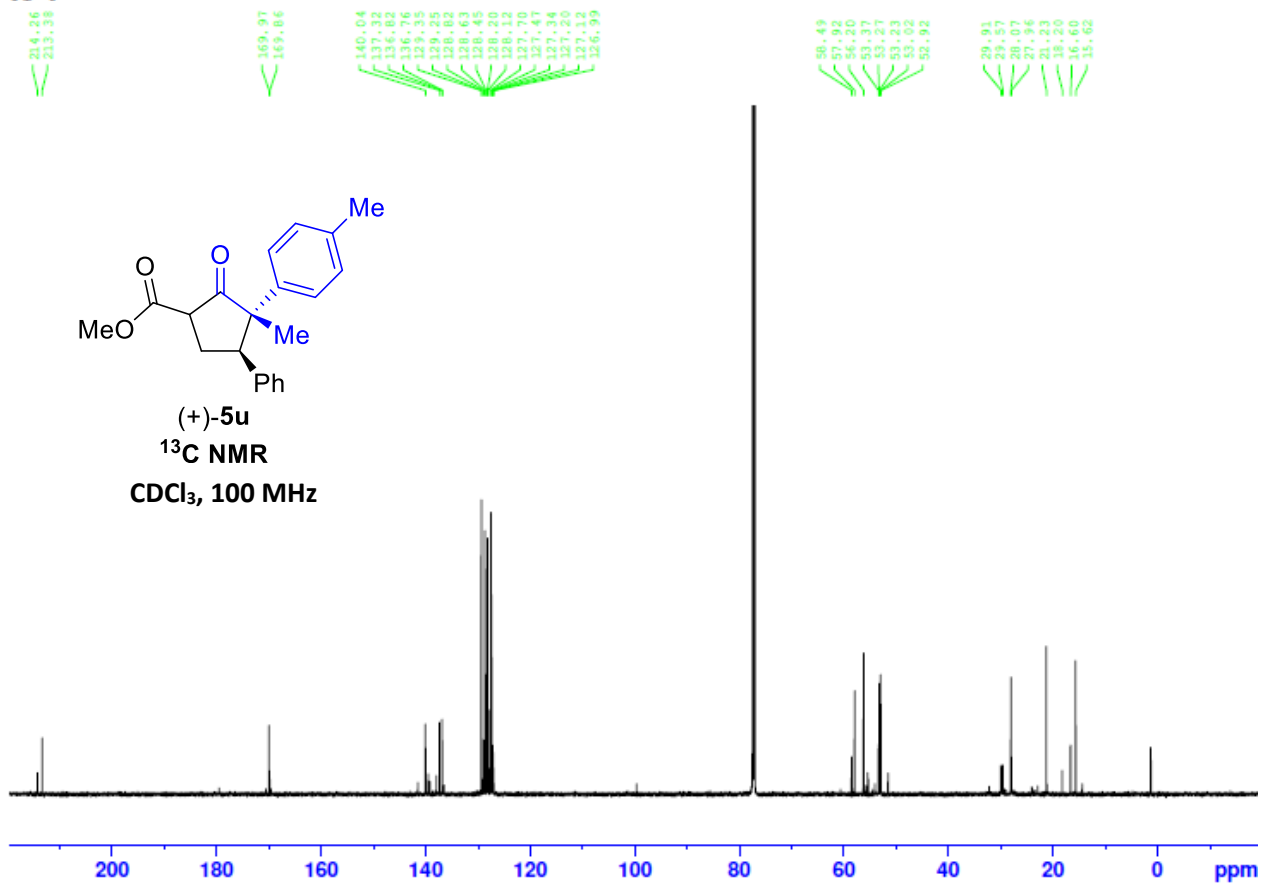

Supplement: c9cc07477e2.pdf [file c9cc07477e2.pdf]
